# Supplementary material for: Convergent changes in muscle metabolism depend on duration of high-altitude ancestry across Andean waterfowl
Source: eLife. 2020 Jul 30;9:e56259. doi: 10.7554/eLife.56259 (PMC7494360; doi:10.7554/eLife.56259)
Supplement: Supplementary file 2. [file elife-56259-supp2.xlsx]

## Sheet: Sheet1
McCracken KG, Bulgarella M, Johnson KP, Kuhner MK, Trucco J, Valqui TH, Wilson RE, Peters JL	2009	Gene flow in the face of countervailing selection: adaptation to high-altitude hypoxia in the βA hemoglobin subunit of yellow-billed pintails in the Andes	https://www.ncbi.nlm.nih.gov/nuccore/	https://www.ncbi.nlm.nih.gov/nuccore/ FJ618397	NCBI GenBank	FJ618397
McCracken KG, Bulgarella M, Johnson KP, Kuhner MK, Trucco J, Valqui TH, Wilson RE, Peters JL	2009	Gene flow in the face of countervailing selection: adaptation to high-altitude hypoxia in the βA hemoglobin subunit of yellow-billed pintails in the Andes	https://www.ncbi.nlm.nih.gov/nuccore/	https://www.ncbi.nlm.nih.gov/nuccore/ FJ618398	NCBI GenBank	FJ618398
McCracken KG, Bulgarella M, Johnson KP, Kuhner MK, Trucco J, Valqui TH, Wilson RE, Peters JL	2009	Gene flow in the face of countervailing selection: adaptation to high-altitude hypoxia in the βA hemoglobin subunit of yellow-billed pintails in the Andes	https://www.ncbi.nlm.nih.gov/nuccore/	https://www.ncbi.nlm.nih.gov/nuccore/ FJ618399	NCBI GenBank	FJ618399
McCracken KG, Bulgarella M, Johnson KP, Kuhner MK, Trucco J, Valqui TH, Wilson RE, Peters JL	2009	Gene flow in the face of countervailing selection: adaptation to high-altitude hypoxia in the βA hemoglobin subunit of yellow-billed pintails in the Andes	https://www.ncbi.nlm.nih.gov/nuccore/	https://www.ncbi.nlm.nih.gov/nuccore/ FJ618400	NCBI GenBank	FJ618400
McCracken KG, Bulgarella M, Johnson KP, Kuhner MK, Trucco J, Valqui TH, Wilson RE, Peters JL	2009	Gene flow in the face of countervailing selection: adaptation to high-altitude hypoxia in the βA hemoglobin subunit of yellow-billed pintails in the Andes	https://www.ncbi.nlm.nih.gov/nuccore/	https://www.ncbi.nlm.nih.gov/nuccore/ FJ618401	NCBI GenBank	FJ618401
McCracken KG, Bulgarella M, Johnson KP, Kuhner MK, Trucco J, Valqui TH, Wilson RE, Peters JL	2009	Gene flow in the face of countervailing selection: adaptation to high-altitude hypoxia in the βA hemoglobin subunit of yellow-billed pintails in the Andes	https://www.ncbi.nlm.nih.gov/nuccore/	https://www.ncbi.nlm.nih.gov/nuccore/ FJ618402	NCBI GenBank	FJ618402
McCracken KG, Bulgarella M, Johnson KP, Kuhner MK, Trucco J, Valqui TH, Wilson RE, Peters JL	2009	Gene flow in the face of countervailing selection: adaptation to high-altitude hypoxia in the βA hemoglobin subunit of yellow-billed pintails in the Andes	https://www.ncbi.nlm.nih.gov/nuccore/	https://www.ncbi.nlm.nih.gov/nuccore/ FJ618403	NCBI GenBank	FJ618403
McCracken KG, Bulgarella M, Johnson KP, Kuhner MK, Trucco J, Valqui TH, Wilson RE, Peters JL	2009	Gene flow in the face of countervailing selection: adaptation to high-altitude hypoxia in the βA hemoglobin subunit of yellow-billed pintails in the Andes	https://www.ncbi.nlm.nih.gov/nuccore/	https://www.ncbi.nlm.nih.gov/nuccore/ FJ618404	NCBI GenBank	FJ618404
McCracken KG, Bulgarella M, Johnson KP, Kuhner MK, Trucco J, Valqui TH, Wilson RE, Peters JL	2009	Gene flow in the face of countervailing selection: adaptation to high-altitude hypoxia in the βA hemoglobin subunit of yellow-billed pintails in the Andes	https://www.ncbi.nlm.nih.gov/nuccore/	https://www.ncbi.nlm.nih.gov/nuccore/ FJ618405	NCBI GenBank	FJ618405
McCracken KG, Bulgarella M, Johnson KP, Kuhner MK, Trucco J, Valqui TH, Wilson RE, Peters JL	2009	Gene flow in the face of countervailing selection: adaptation to high-altitude hypoxia in the βA hemoglobin subunit of yellow-billed pintails in the Andes	https://www.ncbi.nlm.nih.gov/nuccore/	https://www.ncbi.nlm.nih.gov/nuccore/ FJ618406	NCBI GenBank	FJ618406
McCracken KG, Bulgarella M, Johnson KP, Kuhner MK, Trucco J, Valqui TH, Wilson RE, Peters JL	2009	Gene flow in the face of countervailing selection: adaptation to high-altitude hypoxia in the βA hemoglobin subunit of yellow-billed pintails in the Andes	https://www.ncbi.nlm.nih.gov/nuccore/	https://www.ncbi.nlm.nih.gov/nuccore/ FJ618407	NCBI GenBank	FJ618407
McCracken KG, Bulgarella M, Johnson KP, Kuhner MK, Trucco J, Valqui TH, Wilson RE, Peters JL	2009	Gene flow in the face of countervailing selection: adaptation to high-altitude hypoxia in the βA hemoglobin subunit of yellow-billed pintails in the Andes	https://www.ncbi.nlm.nih.gov/nuccore/	https://www.ncbi.nlm.nih.gov/nuccore/ FJ618408	NCBI GenBank	FJ618408
McCracken KG, Bulgarella M, Johnson KP, Kuhner MK, Trucco J, Valqui TH, Wilson RE, Peters JL	2009	Gene flow in the face of countervailing selection: adaptation to high-altitude hypoxia in the βA hemoglobin subunit of yellow-billed pintails in the Andes	https://www.ncbi.nlm.nih.gov/nuccore/	https://www.ncbi.nlm.nih.gov/nuccore/ FJ618409	NCBI GenBank	FJ618409
McCracken KG, Bulgarella M, Johnson KP, Kuhner MK, Trucco J, Valqui TH, Wilson RE, Peters JL	2009	Gene flow in the face of countervailing selection: adaptation to high-altitude hypoxia in the βA hemoglobin subunit of yellow-billed pintails in the Andes	https://www.ncbi.nlm.nih.gov/nuccore/	https://www.ncbi.nlm.nih.gov/nuccore/ FJ618410	NCBI GenBank	FJ618410
McCracken KG, Bulgarella M, Johnson KP, Kuhner MK, Trucco J, Valqui TH, Wilson RE, Peters JL	2009	Gene flow in the face of countervailing selection: adaptation to high-altitude hypoxia in the βA hemoglobin subunit of yellow-billed pintails in the Andes	https://www.ncbi.nlm.nih.gov/nuccore/	https://www.ncbi.nlm.nih.gov/nuccore/ FJ618411	NCBI GenBank	FJ618411
McCracken KG, Bulgarella M, Johnson KP, Kuhner MK, Trucco J, Valqui TH, Wilson RE, Peters JL	2009	Gene flow in the face of countervailing selection: adaptation to high-altitude hypoxia in the βA hemoglobin subunit of yellow-billed pintails in the Andes	https://www.ncbi.nlm.nih.gov/nuccore/	https://www.ncbi.nlm.nih.gov/nuccore/ FJ618412	NCBI GenBank	FJ618412
McCracken KG, Bulgarella M, Johnson KP, Kuhner MK, Trucco J, Valqui TH, Wilson RE, Peters JL	2009	Gene flow in the face of countervailing selection: adaptation to high-altitude hypoxia in the βA hemoglobin subunit of yellow-billed pintails in the Andes	https://www.ncbi.nlm.nih.gov/nuccore/	https://www.ncbi.nlm.nih.gov/nuccore/ FJ618413	NCBI GenBank	FJ618413
McCracken KG, Bulgarella M, Johnson KP, Kuhner MK, Trucco J, Valqui TH, Wilson RE, Peters JL	2009	Gene flow in the face of countervailing selection: adaptation to high-altitude hypoxia in the βA hemoglobin subunit of yellow-billed pintails in the Andes	https://www.ncbi.nlm.nih.gov/nuccore/	https://www.ncbi.nlm.nih.gov/nuccore/ FJ618414	NCBI GenBank	FJ618414
McCracken KG, Bulgarella M, Johnson KP, Kuhner MK, Trucco J, Valqui TH, Wilson RE, Peters JL	2009	Gene flow in the face of countervailing selection: adaptation to high-altitude hypoxia in the βA hemoglobin subunit of yellow-billed pintails in the Andes	https://www.ncbi.nlm.nih.gov/nuccore/	https://www.ncbi.nlm.nih.gov/nuccore/ FJ618415	NCBI GenBank	FJ618415
McCracken KG, Bulgarella M, Johnson KP, Kuhner MK, Trucco J, Valqui TH, Wilson RE, Peters JL	2009	Gene flow in the face of countervailing selection: adaptation to high-altitude hypoxia in the βA hemoglobin subunit of yellow-billed pintails in the Andes	https://www.ncbi.nlm.nih.gov/nuccore/	https://www.ncbi.nlm.nih.gov/nuccore/ FJ618416	NCBI GenBank	FJ618416
McCracken KG, Bulgarella M, Johnson KP, Kuhner MK, Trucco J, Valqui TH, Wilson RE, Peters JL	2009	Gene flow in the face of countervailing selection: adaptation to high-altitude hypoxia in the βA hemoglobin subunit of yellow-billed pintails in the Andes	https://www.ncbi.nlm.nih.gov/nuccore/	https://www.ncbi.nlm.nih.gov/nuccore/ FJ618417	NCBI GenBank	FJ618417
McCracken KG, Bulgarella M, Johnson KP, Kuhner MK, Trucco J, Valqui TH, Wilson RE, Peters JL	2009	Gene flow in the face of countervailing selection: adaptation to high-altitude hypoxia in the βA hemoglobin subunit of yellow-billed pintails in the Andes	https://www.ncbi.nlm.nih.gov/nuccore/	https://www.ncbi.nlm.nih.gov/nuccore/ FJ618418	NCBI GenBank	FJ618418
McCracken KG, Bulgarella M, Johnson KP, Kuhner MK, Trucco J, Valqui TH, Wilson RE, Peters JL	2009	Gene flow in the face of countervailing selection: adaptation to high-altitude hypoxia in the βA hemoglobin subunit of yellow-billed pintails in the Andes	https://www.ncbi.nlm.nih.gov/nuccore/	https://www.ncbi.nlm.nih.gov/nuccore/ FJ618419	NCBI GenBank	FJ618419
McCracken KG, Bulgarella M, Johnson KP, Kuhner MK, Trucco J, Valqui TH, Wilson RE, Peters JL	2009	Gene flow in the face of countervailing selection: adaptation to high-altitude hypoxia in the βA hemoglobin subunit of yellow-billed pintails in the Andes	https://www.ncbi.nlm.nih.gov/nuccore/	https://www.ncbi.nlm.nih.gov/nuccore/ FJ618420	NCBI GenBank	FJ618420
McCracken KG, Bulgarella M, Johnson KP, Kuhner MK, Trucco J, Valqui TH, Wilson RE, Peters JL	2009	Gene flow in the face of countervailing selection: adaptation to high-altitude hypoxia in the βA hemoglobin subunit of yellow-billed pintails in the Andes	https://www.ncbi.nlm.nih.gov/nuccore/	https://www.ncbi.nlm.nih.gov/nuccore/ FJ618421	NCBI GenBank	FJ618421
McCracken KG, Bulgarella M, Johnson KP, Kuhner MK, Trucco J, Valqui TH, Wilson RE, Peters JL	2009	Gene flow in the face of countervailing selection: adaptation to high-altitude hypoxia in the βA hemoglobin subunit of yellow-billed pintails in the Andes	https://www.ncbi.nlm.nih.gov/nuccore/	https://www.ncbi.nlm.nih.gov/nuccore/ FJ618422	NCBI GenBank	FJ618422
McCracken KG, Bulgarella M, Johnson KP, Kuhner MK, Trucco J, Valqui TH, Wilson RE, Peters JL	2009	Gene flow in the face of countervailing selection: adaptation to high-altitude hypoxia in the βA hemoglobin subunit of yellow-billed pintails in the Andes	https://www.ncbi.nlm.nih.gov/nuccore/	https://www.ncbi.nlm.nih.gov/nuccore/ FJ618423	NCBI GenBank	FJ618423
McCracken KG, Bulgarella M, Johnson KP, Kuhner MK, Trucco J, Valqui TH, Wilson RE, Peters JL	2009	Gene flow in the face of countervailing selection: adaptation to high-altitude hypoxia in the βA hemoglobin subunit of yellow-billed pintails in the Andes	https://www.ncbi.nlm.nih.gov/nuccore/	https://www.ncbi.nlm.nih.gov/nuccore/ FJ618424	NCBI GenBank	FJ618424
McCracken KG, Bulgarella M, Johnson KP, Kuhner MK, Trucco J, Valqui TH, Wilson RE, Peters JL	2009	Gene flow in the face of countervailing selection: adaptation to high-altitude hypoxia in the βA hemoglobin subunit of yellow-billed pintails in the Andes	https://www.ncbi.nlm.nih.gov/nuccore/	https://www.ncbi.nlm.nih.gov/nuccore/ FJ618425	NCBI GenBank	FJ618425
McCracken KG, Bulgarella M, Johnson KP, Kuhner MK, Trucco J, Valqui TH, Wilson RE, Peters JL	2009	Gene flow in the face of countervailing selection: adaptation to high-altitude hypoxia in the βA hemoglobin subunit of yellow-billed pintails in the Andes	https://www.ncbi.nlm.nih.gov/nuccore/	https://www.ncbi.nlm.nih.gov/nuccore/ FJ618426	NCBI GenBank	FJ618426
McCracken KG, Bulgarella M, Johnson KP, Kuhner MK, Trucco J, Valqui TH, Wilson RE, Peters JL	2009	Gene flow in the face of countervailing selection: adaptation to high-altitude hypoxia in the βA hemoglobin subunit of yellow-billed pintails in the Andes	https://www.ncbi.nlm.nih.gov/nuccore/	https://www.ncbi.nlm.nih.gov/nuccore/ FJ618427	NCBI GenBank	FJ618427
McCracken KG, Bulgarella M, Johnson KP, Kuhner MK, Trucco J, Valqui TH, Wilson RE, Peters JL	2009	Gene flow in the face of countervailing selection: adaptation to high-altitude hypoxia in the βA hemoglobin subunit of yellow-billed pintails in the Andes	https://www.ncbi.nlm.nih.gov/nuccore/	https://www.ncbi.nlm.nih.gov/nuccore/ FJ618428	NCBI GenBank	FJ618428
McCracken KG, Bulgarella M, Johnson KP, Kuhner MK, Trucco J, Valqui TH, Wilson RE, Peters JL	2009	Gene flow in the face of countervailing selection: adaptation to high-altitude hypoxia in the βA hemoglobin subunit of yellow-billed pintails in the Andes	https://www.ncbi.nlm.nih.gov/nuccore/	https://www.ncbi.nlm.nih.gov/nuccore/ FJ618429	NCBI GenBank	FJ618429
McCracken KG, Bulgarella M, Johnson KP, Kuhner MK, Trucco J, Valqui TH, Wilson RE, Peters JL	2009	Gene flow in the face of countervailing selection: adaptation to high-altitude hypoxia in the βA hemoglobin subunit of yellow-billed pintails in the Andes	https://www.ncbi.nlm.nih.gov/nuccore/	https://www.ncbi.nlm.nih.gov/nuccore/ FJ618430	NCBI GenBank	FJ618430
McCracken KG, Bulgarella M, Johnson KP, Kuhner MK, Trucco J, Valqui TH, Wilson RE, Peters JL	2009	Gene flow in the face of countervailing selection: adaptation to high-altitude hypoxia in the βA hemoglobin subunit of yellow-billed pintails in the Andes	https://www.ncbi.nlm.nih.gov/nuccore/	https://www.ncbi.nlm.nih.gov/nuccore/ FJ618431	NCBI GenBank	FJ618431
McCracken KG, Bulgarella M, Johnson KP, Kuhner MK, Trucco J, Valqui TH, Wilson RE, Peters JL	2009	Gene flow in the face of countervailing selection: adaptation to high-altitude hypoxia in the βA hemoglobin subunit of yellow-billed pintails in the Andes	https://www.ncbi.nlm.nih.gov/nuccore/	https://www.ncbi.nlm.nih.gov/nuccore/ FJ618432	NCBI GenBank	FJ618432
McCracken KG, Bulgarella M, Johnson KP, Kuhner MK, Trucco J, Valqui TH, Wilson RE, Peters JL	2009	Gene flow in the face of countervailing selection: adaptation to high-altitude hypoxia in the βA hemoglobin subunit of yellow-billed pintails in the Andes	https://www.ncbi.nlm.nih.gov/nuccore/	https://www.ncbi.nlm.nih.gov/nuccore/ FJ618433	NCBI GenBank	FJ618433
McCracken KG, Bulgarella M, Johnson KP, Kuhner MK, Trucco J, Valqui TH, Wilson RE, Peters JL	2009	Gene flow in the face of countervailing selection: adaptation to high-altitude hypoxia in the βA hemoglobin subunit of yellow-billed pintails in the Andes	https://www.ncbi.nlm.nih.gov/nuccore/	https://www.ncbi.nlm.nih.gov/nuccore/ FJ618434	NCBI GenBank	FJ618434
McCracken KG, Bulgarella M, Johnson KP, Kuhner MK, Trucco J, Valqui TH, Wilson RE, Peters JL	2009	Gene flow in the face of countervailing selection: adaptation to high-altitude hypoxia in the βA hemoglobin subunit of yellow-billed pintails in the Andes	https://www.ncbi.nlm.nih.gov/nuccore/	https://www.ncbi.nlm.nih.gov/nuccore/ FJ618435	NCBI GenBank	FJ618435
McCracken KG, Bulgarella M, Johnson KP, Kuhner MK, Trucco J, Valqui TH, Wilson RE, Peters JL	2009	Gene flow in the face of countervailing selection: adaptation to high-altitude hypoxia in the βA hemoglobin subunit of yellow-billed pintails in the Andes	https://www.ncbi.nlm.nih.gov/nuccore/	https://www.ncbi.nlm.nih.gov/nuccore/ FJ618436	NCBI GenBank	FJ618436
McCracken KG, Bulgarella M, Johnson KP, Kuhner MK, Trucco J, Valqui TH, Wilson RE, Peters JL	2009	Gene flow in the face of countervailing selection: adaptation to high-altitude hypoxia in the βA hemoglobin subunit of yellow-billed pintails in the Andes	https://www.ncbi.nlm.nih.gov/nuccore/	https://www.ncbi.nlm.nih.gov/nuccore/ FJ618437	NCBI GenBank	FJ618437
McCracken KG, Bulgarella M, Johnson KP, Kuhner MK, Trucco J, Valqui TH, Wilson RE, Peters JL	2009	Gene flow in the face of countervailing selection: adaptation to high-altitude hypoxia in the βA hemoglobin subunit of yellow-billed pintails in the Andes	https://www.ncbi.nlm.nih.gov/nuccore/	https://www.ncbi.nlm.nih.gov/nuccore/ FJ618438	NCBI GenBank	FJ618438
McCracken KG, Bulgarella M, Johnson KP, Kuhner MK, Trucco J, Valqui TH, Wilson RE, Peters JL	2009	Gene flow in the face of countervailing selection: adaptation to high-altitude hypoxia in the βA hemoglobin subunit of yellow-billed pintails in the Andes	https://www.ncbi.nlm.nih.gov/nuccore/	https://www.ncbi.nlm.nih.gov/nuccore/ FJ618439	NCBI GenBank	FJ618439
McCracken KG, Bulgarella M, Johnson KP, Kuhner MK, Trucco J, Valqui TH, Wilson RE, Peters JL	2009	Gene flow in the face of countervailing selection: adaptation to high-altitude hypoxia in the βA hemoglobin subunit of yellow-billed pintails in the Andes	https://www.ncbi.nlm.nih.gov/nuccore/	https://www.ncbi.nlm.nih.gov/nuccore/ FJ618440	NCBI GenBank	FJ618440
McCracken KG, Bulgarella M, Johnson KP, Kuhner MK, Trucco J, Valqui TH, Wilson RE, Peters JL	2009	Gene flow in the face of countervailing selection: adaptation to high-altitude hypoxia in the βA hemoglobin subunit of yellow-billed pintails in the Andes	https://www.ncbi.nlm.nih.gov/nuccore/	https://www.ncbi.nlm.nih.gov/nuccore/ FJ618441	NCBI GenBank	FJ618441
McCracken KG, Bulgarella M, Johnson KP, Kuhner MK, Trucco J, Valqui TH, Wilson RE, Peters JL	2009	Gene flow in the face of countervailing selection: adaptation to high-altitude hypoxia in the βA hemoglobin subunit of yellow-billed pintails in the Andes	https://www.ncbi.nlm.nih.gov/nuccore/	https://www.ncbi.nlm.nih.gov/nuccore/ FJ618442	NCBI GenBank	FJ618442
McCracken KG, Bulgarella M, Johnson KP, Kuhner MK, Trucco J, Valqui TH, Wilson RE, Peters JL	2009	Gene flow in the face of countervailing selection: adaptation to high-altitude hypoxia in the βA hemoglobin subunit of yellow-billed pintails in the Andes	https://www.ncbi.nlm.nih.gov/nuccore/	https://www.ncbi.nlm.nih.gov/nuccore/ FJ618443	NCBI GenBank	FJ618443
McCracken KG, Bulgarella M, Johnson KP, Kuhner MK, Trucco J, Valqui TH, Wilson RE, Peters JL	2009	Gene flow in the face of countervailing selection: adaptation to high-altitude hypoxia in the βA hemoglobin subunit of yellow-billed pintails in the Andes	https://www.ncbi.nlm.nih.gov/nuccore/	https://www.ncbi.nlm.nih.gov/nuccore/ FJ618444	NCBI GenBank	FJ618444
McCracken KG, Bulgarella M, Johnson KP, Kuhner MK, Trucco J, Valqui TH, Wilson RE, Peters JL	2009	Gene flow in the face of countervailing selection: adaptation to high-altitude hypoxia in the βA hemoglobin subunit of yellow-billed pintails in the Andes	https://www.ncbi.nlm.nih.gov/nuccore/	https://www.ncbi.nlm.nih.gov/nuccore/ FJ618445	NCBI GenBank	FJ618445
McCracken KG, Bulgarella M, Johnson KP, Kuhner MK, Trucco J, Valqui TH, Wilson RE, Peters JL	2009	Gene flow in the face of countervailing selection: adaptation to high-altitude hypoxia in the βA hemoglobin subunit of yellow-billed pintails in the Andes	https://www.ncbi.nlm.nih.gov/nuccore/	https://www.ncbi.nlm.nih.gov/nuccore/ FJ618446	NCBI GenBank	FJ618446
McCracken KG, Bulgarella M, Johnson KP, Kuhner MK, Trucco J, Valqui TH, Wilson RE, Peters JL	2009	Gene flow in the face of countervailing selection: adaptation to high-altitude hypoxia in the βA hemoglobin subunit of yellow-billed pintails in the Andes	https://www.ncbi.nlm.nih.gov/nuccore/	https://www.ncbi.nlm.nih.gov/nuccore/ FJ618447	NCBI GenBank	FJ618447
McCracken KG, Bulgarella M, Johnson KP, Kuhner MK, Trucco J, Valqui TH, Wilson RE, Peters JL	2009	Gene flow in the face of countervailing selection: adaptation to high-altitude hypoxia in the βA hemoglobin subunit of yellow-billed pintails in the Andes	https://www.ncbi.nlm.nih.gov/nuccore/	https://www.ncbi.nlm.nih.gov/nuccore/ FJ618448	NCBI GenBank	FJ618448
McCracken KG, Bulgarella M, Johnson KP, Kuhner MK, Trucco J, Valqui TH, Wilson RE, Peters JL	2009	Gene flow in the face of countervailing selection: adaptation to high-altitude hypoxia in the βA hemoglobin subunit of yellow-billed pintails in the Andes	https://www.ncbi.nlm.nih.gov/nuccore/	https://www.ncbi.nlm.nih.gov/nuccore/ FJ618449	NCBI GenBank	FJ618449
McCracken KG, Bulgarella M, Johnson KP, Kuhner MK, Trucco J, Valqui TH, Wilson RE, Peters JL	2009	Gene flow in the face of countervailing selection: adaptation to high-altitude hypoxia in the βA hemoglobin subunit of yellow-billed pintails in the Andes	https://www.ncbi.nlm.nih.gov/nuccore/	https://www.ncbi.nlm.nih.gov/nuccore/ FJ618450	NCBI GenBank	FJ618450
McCracken KG, Bulgarella M, Johnson KP, Kuhner MK, Trucco J, Valqui TH, Wilson RE, Peters JL	2009	Gene flow in the face of countervailing selection: adaptation to high-altitude hypoxia in the βA hemoglobin subunit of yellow-billed pintails in the Andes	https://www.ncbi.nlm.nih.gov/nuccore/	https://www.ncbi.nlm.nih.gov/nuccore/ FJ618451	NCBI GenBank	FJ618451
McCracken KG, Bulgarella M, Johnson KP, Kuhner MK, Trucco J, Valqui TH, Wilson RE, Peters JL	2009	Gene flow in the face of countervailing selection: adaptation to high-altitude hypoxia in the βA hemoglobin subunit of yellow-billed pintails in the Andes	https://www.ncbi.nlm.nih.gov/nuccore/	https://www.ncbi.nlm.nih.gov/nuccore/ FJ618452	NCBI GenBank	FJ618452
McCracken KG, Bulgarella M, Johnson KP, Kuhner MK, Trucco J, Valqui TH, Wilson RE, Peters JL	2009	Gene flow in the face of countervailing selection: adaptation to high-altitude hypoxia in the βA hemoglobin subunit of yellow-billed pintails in the Andes	https://www.ncbi.nlm.nih.gov/nuccore/	https://www.ncbi.nlm.nih.gov/nuccore/ FJ618453	NCBI GenBank	FJ618453
McCracken KG, Bulgarella M, Johnson KP, Kuhner MK, Trucco J, Valqui TH, Wilson RE, Peters JL	2009	Gene flow in the face of countervailing selection: adaptation to high-altitude hypoxia in the βA hemoglobin subunit of yellow-billed pintails in the Andes	https://www.ncbi.nlm.nih.gov/nuccore/	https://www.ncbi.nlm.nih.gov/nuccore/ FJ618454	NCBI GenBank	FJ618454
McCracken KG, Bulgarella M, Johnson KP, Kuhner MK, Trucco J, Valqui TH, Wilson RE, Peters JL	2009	Gene flow in the face of countervailing selection: adaptation to high-altitude hypoxia in the βA hemoglobin subunit of yellow-billed pintails in the Andes	https://www.ncbi.nlm.nih.gov/nuccore/	https://www.ncbi.nlm.nih.gov/nuccore/ FJ618455	NCBI GenBank	FJ618455
McCracken KG, Bulgarella M, Johnson KP, Kuhner MK, Trucco J, Valqui TH, Wilson RE, Peters JL	2009	Gene flow in the face of countervailing selection: adaptation to high-altitude hypoxia in the βA hemoglobin subunit of yellow-billed pintails in the Andes	https://www.ncbi.nlm.nih.gov/nuccore/	https://www.ncbi.nlm.nih.gov/nuccore/ FJ618456	NCBI GenBank	FJ618456
McCracken KG, Bulgarella M, Johnson KP, Kuhner MK, Trucco J, Valqui TH, Wilson RE, Peters JL	2009	Gene flow in the face of countervailing selection: adaptation to high-altitude hypoxia in the βA hemoglobin subunit of yellow-billed pintails in the Andes	https://www.ncbi.nlm.nih.gov/nuccore/	https://www.ncbi.nlm.nih.gov/nuccore/ FJ618457	NCBI GenBank	FJ618457
McCracken KG, Bulgarella M, Johnson KP, Kuhner MK, Trucco J, Valqui TH, Wilson RE, Peters JL	2009	Gene flow in the face of countervailing selection: adaptation to high-altitude hypoxia in the βA hemoglobin subunit of yellow-billed pintails in the Andes	https://www.ncbi.nlm.nih.gov/nuccore/	https://www.ncbi.nlm.nih.gov/nuccore/ FJ618458	NCBI GenBank	FJ618458
McCracken KG, Bulgarella M, Johnson KP, Kuhner MK, Trucco J, Valqui TH, Wilson RE, Peters JL	2009	Gene flow in the face of countervailing selection: adaptation to high-altitude hypoxia in the βA hemoglobin subunit of yellow-billed pintails in the Andes	https://www.ncbi.nlm.nih.gov/nuccore/	https://www.ncbi.nlm.nih.gov/nuccore/ FJ618459	NCBI GenBank	FJ618459
McCracken KG, Bulgarella M, Johnson KP, Kuhner MK, Trucco J, Valqui TH, Wilson RE, Peters JL	2009	Gene flow in the face of countervailing selection: adaptation to high-altitude hypoxia in the βA hemoglobin subunit of yellow-billed pintails in the Andes	https://www.ncbi.nlm.nih.gov/nuccore/	https://www.ncbi.nlm.nih.gov/nuccore/ FJ618460	NCBI GenBank	FJ618460
McCracken KG, Bulgarella M, Johnson KP, Kuhner MK, Trucco J, Valqui TH, Wilson RE, Peters JL	2009	Gene flow in the face of countervailing selection: adaptation to high-altitude hypoxia in the βA hemoglobin subunit of yellow-billed pintails in the Andes	https://www.ncbi.nlm.nih.gov/nuccore/	https://www.ncbi.nlm.nih.gov/nuccore/ FJ618461	NCBI GenBank	FJ618461
McCracken KG, Bulgarella M, Johnson KP, Kuhner MK, Trucco J, Valqui TH, Wilson RE, Peters JL	2009	Gene flow in the face of countervailing selection: adaptation to high-altitude hypoxia in the βA hemoglobin subunit of yellow-billed pintails in the Andes	https://www.ncbi.nlm.nih.gov/nuccore/	https://www.ncbi.nlm.nih.gov/nuccore/ FJ618462	NCBI GenBank	FJ618462
McCracken KG, Bulgarella M, Johnson KP, Kuhner MK, Trucco J, Valqui TH, Wilson RE, Peters JL	2009	Gene flow in the face of countervailing selection: adaptation to high-altitude hypoxia in the βA hemoglobin subunit of yellow-billed pintails in the Andes	https://www.ncbi.nlm.nih.gov/nuccore/	https://www.ncbi.nlm.nih.gov/nuccore/ FJ618463	NCBI GenBank	FJ618463
McCracken KG, Bulgarella M, Johnson KP, Kuhner MK, Trucco J, Valqui TH, Wilson RE, Peters JL	2009	Gene flow in the face of countervailing selection: adaptation to high-altitude hypoxia in the βA hemoglobin subunit of yellow-billed pintails in the Andes	https://www.ncbi.nlm.nih.gov/nuccore/	https://www.ncbi.nlm.nih.gov/nuccore/ FJ618464	NCBI GenBank	FJ618464
McCracken KG, Bulgarella M, Johnson KP, Kuhner MK, Trucco J, Valqui TH, Wilson RE, Peters JL	2009	Gene flow in the face of countervailing selection: adaptation to high-altitude hypoxia in the βA hemoglobin subunit of yellow-billed pintails in the Andes	https://www.ncbi.nlm.nih.gov/nuccore/	https://www.ncbi.nlm.nih.gov/nuccore/ FJ618465	NCBI GenBank	FJ618465
McCracken KG, Bulgarella M, Johnson KP, Kuhner MK, Trucco J, Valqui TH, Wilson RE, Peters JL	2009	Gene flow in the face of countervailing selection: adaptation to high-altitude hypoxia in the βA hemoglobin subunit of yellow-billed pintails in the Andes	https://www.ncbi.nlm.nih.gov/nuccore/	https://www.ncbi.nlm.nih.gov/nuccore/ FJ618466	NCBI GenBank	FJ618466
McCracken KG, Bulgarella M, Johnson KP, Kuhner MK, Trucco J, Valqui TH, Wilson RE, Peters JL	2009	Gene flow in the face of countervailing selection: adaptation to high-altitude hypoxia in the βA hemoglobin subunit of yellow-billed pintails in the Andes	https://www.ncbi.nlm.nih.gov/nuccore/	https://www.ncbi.nlm.nih.gov/nuccore/ FJ618467	NCBI GenBank	FJ618467
McCracken KG, Bulgarella M, Johnson KP, Kuhner MK, Trucco J, Valqui TH, Wilson RE, Peters JL	2009	Gene flow in the face of countervailing selection: adaptation to high-altitude hypoxia in the βA hemoglobin subunit of yellow-billed pintails in the Andes	https://www.ncbi.nlm.nih.gov/nuccore/	https://www.ncbi.nlm.nih.gov/nuccore/ FJ618468	NCBI GenBank	FJ618468
McCracken KG, Bulgarella M, Johnson KP, Kuhner MK, Trucco J, Valqui TH, Wilson RE, Peters JL	2009	Gene flow in the face of countervailing selection: adaptation to high-altitude hypoxia in the βA hemoglobin subunit of yellow-billed pintails in the Andes	https://www.ncbi.nlm.nih.gov/nuccore/	https://www.ncbi.nlm.nih.gov/nuccore/ FJ618469	NCBI GenBank	FJ618469
McCracken KG, Bulgarella M, Johnson KP, Kuhner MK, Trucco J, Valqui TH, Wilson RE, Peters JL	2009	Gene flow in the face of countervailing selection: adaptation to high-altitude hypoxia in the βA hemoglobin subunit of yellow-billed pintails in the Andes	https://www.ncbi.nlm.nih.gov/nuccore/	https://www.ncbi.nlm.nih.gov/nuccore/ FJ618470	NCBI GenBank	FJ618470
McCracken KG, Bulgarella M, Johnson KP, Kuhner MK, Trucco J, Valqui TH, Wilson RE, Peters JL	2009	Gene flow in the face of countervailing selection: adaptation to high-altitude hypoxia in the βA hemoglobin subunit of yellow-billed pintails in the Andes	https://www.ncbi.nlm.nih.gov/nuccore/	https://www.ncbi.nlm.nih.gov/nuccore/ FJ618471	NCBI GenBank	FJ618471
McCracken KG, Bulgarella M, Johnson KP, Kuhner MK, Trucco J, Valqui TH, Wilson RE, Peters JL	2009	Gene flow in the face of countervailing selection: adaptation to high-altitude hypoxia in the βA hemoglobin subunit of yellow-billed pintails in the Andes	https://www.ncbi.nlm.nih.gov/nuccore/	https://www.ncbi.nlm.nih.gov/nuccore/ FJ618472	NCBI GenBank	FJ618472
McCracken KG, Bulgarella M, Johnson KP, Kuhner MK, Trucco J, Valqui TH, Wilson RE, Peters JL	2009	Gene flow in the face of countervailing selection: adaptation to high-altitude hypoxia in the βA hemoglobin subunit of yellow-billed pintails in the Andes	https://www.ncbi.nlm.nih.gov/nuccore/	https://www.ncbi.nlm.nih.gov/nuccore/ FJ618473	NCBI GenBank	FJ618473
McCracken KG, Bulgarella M, Johnson KP, Kuhner MK, Trucco J, Valqui TH, Wilson RE, Peters JL	2009	Gene flow in the face of countervailing selection: adaptation to high-altitude hypoxia in the βA hemoglobin subunit of yellow-billed pintails in the Andes	https://www.ncbi.nlm.nih.gov/nuccore/	https://www.ncbi.nlm.nih.gov/nuccore/ FJ618474	NCBI GenBank	FJ618474
McCracken KG, Bulgarella M, Johnson KP, Kuhner MK, Trucco J, Valqui TH, Wilson RE, Peters JL	2009	Gene flow in the face of countervailing selection: adaptation to high-altitude hypoxia in the βA hemoglobin subunit of yellow-billed pintails in the Andes	https://www.ncbi.nlm.nih.gov/nuccore/	https://www.ncbi.nlm.nih.gov/nuccore/ FJ618475	NCBI GenBank	FJ618475
McCracken KG, Bulgarella M, Johnson KP, Kuhner MK, Trucco J, Valqui TH, Wilson RE, Peters JL	2009	Gene flow in the face of countervailing selection: adaptation to high-altitude hypoxia in the βA hemoglobin subunit of yellow-billed pintails in the Andes	https://www.ncbi.nlm.nih.gov/nuccore/	https://www.ncbi.nlm.nih.gov/nuccore/ FJ618476	NCBI GenBank	FJ618476
McCracken KG, Bulgarella M, Johnson KP, Kuhner MK, Trucco J, Valqui TH, Wilson RE, Peters JL	2009	Gene flow in the face of countervailing selection: adaptation to high-altitude hypoxia in the βA hemoglobin subunit of yellow-billed pintails in the Andes	https://www.ncbi.nlm.nih.gov/nuccore/	https://www.ncbi.nlm.nih.gov/nuccore/ FJ618477	NCBI GenBank	FJ618477
McCracken KG, Bulgarella M, Johnson KP, Kuhner MK, Trucco J, Valqui TH, Wilson RE, Peters JL	2009	Gene flow in the face of countervailing selection: adaptation to high-altitude hypoxia in the βA hemoglobin subunit of yellow-billed pintails in the Andes	https://www.ncbi.nlm.nih.gov/nuccore/	https://www.ncbi.nlm.nih.gov/nuccore/ FJ618478	NCBI GenBank	FJ618478
McCracken KG, Bulgarella M, Johnson KP, Kuhner MK, Trucco J, Valqui TH, Wilson RE, Peters JL	2009	Gene flow in the face of countervailing selection: adaptation to high-altitude hypoxia in the βA hemoglobin subunit of yellow-billed pintails in the Andes	https://www.ncbi.nlm.nih.gov/nuccore/	https://www.ncbi.nlm.nih.gov/nuccore/ FJ618479	NCBI GenBank	FJ618479
McCracken KG, Bulgarella M, Johnson KP, Kuhner MK, Trucco J, Valqui TH, Wilson RE, Peters JL	2009	Gene flow in the face of countervailing selection: adaptation to high-altitude hypoxia in the βA hemoglobin subunit of yellow-billed pintails in the Andes	https://www.ncbi.nlm.nih.gov/nuccore/	https://www.ncbi.nlm.nih.gov/nuccore/ FJ618480	NCBI GenBank	FJ618480
McCracken KG, Bulgarella M, Johnson KP, Kuhner MK, Trucco J, Valqui TH, Wilson RE, Peters JL	2009	Gene flow in the face of countervailing selection: adaptation to high-altitude hypoxia in the βA hemoglobin subunit of yellow-billed pintails in the Andes	https://www.ncbi.nlm.nih.gov/nuccore/	https://www.ncbi.nlm.nih.gov/nuccore/ FJ618481	NCBI GenBank	FJ618481
McCracken KG, Bulgarella M, Johnson KP, Kuhner MK, Trucco J, Valqui TH, Wilson RE, Peters JL	2009	Gene flow in the face of countervailing selection: adaptation to high-altitude hypoxia in the βA hemoglobin subunit of yellow-billed pintails in the Andes	https://www.ncbi.nlm.nih.gov/nuccore/	https://www.ncbi.nlm.nih.gov/nuccore/ FJ618482	NCBI GenBank	FJ618482
McCracken KG, Bulgarella M, Johnson KP, Kuhner MK, Trucco J, Valqui TH, Wilson RE, Peters JL	2009	Gene flow in the face of countervailing selection: adaptation to high-altitude hypoxia in the βA hemoglobin subunit of yellow-billed pintails in the Andes	https://www.ncbi.nlm.nih.gov/nuccore/	https://www.ncbi.nlm.nih.gov/nuccore/ FJ618483	NCBI GenBank	FJ618483
McCracken KG, Bulgarella M, Johnson KP, Kuhner MK, Trucco J, Valqui TH, Wilson RE, Peters JL	2009	Gene flow in the face of countervailing selection: adaptation to high-altitude hypoxia in the βA hemoglobin subunit of yellow-billed pintails in the Andes	https://www.ncbi.nlm.nih.gov/nuccore/	https://www.ncbi.nlm.nih.gov/nuccore/ FJ618484	NCBI GenBank	FJ618484
McCracken KG, Bulgarella M, Johnson KP, Kuhner MK, Trucco J, Valqui TH, Wilson RE, Peters JL	2009	Gene flow in the face of countervailing selection: adaptation to high-altitude hypoxia in the βA hemoglobin subunit of yellow-billed pintails in the Andes	https://www.ncbi.nlm.nih.gov/nuccore/	https://www.ncbi.nlm.nih.gov/nuccore/ FJ618485	NCBI GenBank	FJ618485
McCracken KG, Bulgarella M, Johnson KP, Kuhner MK, Trucco J, Valqui TH, Wilson RE, Peters JL	2009	Gene flow in the face of countervailing selection: adaptation to high-altitude hypoxia in the βA hemoglobin subunit of yellow-billed pintails in the Andes	https://www.ncbi.nlm.nih.gov/nuccore/	https://www.ncbi.nlm.nih.gov/nuccore/ FJ618486	NCBI GenBank	FJ618486
McCracken KG, Bulgarella M, Johnson KP, Kuhner MK, Trucco J, Valqui TH, Wilson RE, Peters JL	2009	Gene flow in the face of countervailing selection: adaptation to high-altitude hypoxia in the βA hemoglobin subunit of yellow-billed pintails in the Andes	https://www.ncbi.nlm.nih.gov/nuccore/	https://www.ncbi.nlm.nih.gov/nuccore/ FJ618487	NCBI GenBank	FJ618487
McCracken KG, Bulgarella M, Johnson KP, Kuhner MK, Trucco J, Valqui TH, Wilson RE, Peters JL	2009	Gene flow in the face of countervailing selection: adaptation to high-altitude hypoxia in the βA hemoglobin subunit of yellow-billed pintails in the Andes	https://www.ncbi.nlm.nih.gov/nuccore/	https://www.ncbi.nlm.nih.gov/nuccore/ FJ618488	NCBI GenBank	FJ618488
McCracken KG, Bulgarella M, Johnson KP, Kuhner MK, Trucco J, Valqui TH, Wilson RE, Peters JL	2009	Gene flow in the face of countervailing selection: adaptation to high-altitude hypoxia in the βA hemoglobin subunit of yellow-billed pintails in the Andes	https://www.ncbi.nlm.nih.gov/nuccore/	https://www.ncbi.nlm.nih.gov/nuccore/ FJ618489	NCBI GenBank	FJ618489
McCracken KG, Bulgarella M, Johnson KP, Kuhner MK, Trucco J, Valqui TH, Wilson RE, Peters JL	2009	Gene flow in the face of countervailing selection: adaptation to high-altitude hypoxia in the βA hemoglobin subunit of yellow-billed pintails in the Andes	https://www.ncbi.nlm.nih.gov/nuccore/	https://www.ncbi.nlm.nih.gov/nuccore/ FJ618490	NCBI GenBank	FJ618490
McCracken KG, Bulgarella M, Johnson KP, Kuhner MK, Trucco J, Valqui TH, Wilson RE, Peters JL	2009	Gene flow in the face of countervailing selection: adaptation to high-altitude hypoxia in the βA hemoglobin subunit of yellow-billed pintails in the Andes	https://www.ncbi.nlm.nih.gov/nuccore/	https://www.ncbi.nlm.nih.gov/nuccore/ FJ618491	NCBI GenBank	FJ618491
McCracken KG, Bulgarella M, Johnson KP, Kuhner MK, Trucco J, Valqui TH, Wilson RE, Peters JL	2009	Gene flow in the face of countervailing selection: adaptation to high-altitude hypoxia in the βA hemoglobin subunit of yellow-billed pintails in the Andes	https://www.ncbi.nlm.nih.gov/nuccore/	https://www.ncbi.nlm.nih.gov/nuccore/ FJ618492	NCBI GenBank	FJ618492
McCracken KG, Bulgarella M, Johnson KP, Kuhner MK, Trucco J, Valqui TH, Wilson RE, Peters JL	2009	Gene flow in the face of countervailing selection: adaptation to high-altitude hypoxia in the βA hemoglobin subunit of yellow-billed pintails in the Andes	https://www.ncbi.nlm.nih.gov/nuccore/	https://www.ncbi.nlm.nih.gov/nuccore/ FJ618493	NCBI GenBank	FJ618493
McCracken KG, Bulgarella M, Johnson KP, Kuhner MK, Trucco J, Valqui TH, Wilson RE, Peters JL	2009	Gene flow in the face of countervailing selection: adaptation to high-altitude hypoxia in the βA hemoglobin subunit of yellow-billed pintails in the Andes	https://www.ncbi.nlm.nih.gov/nuccore/	https://www.ncbi.nlm.nih.gov/nuccore/ FJ618494	NCBI GenBank	FJ618494
McCracken KG, Bulgarella M, Johnson KP, Kuhner MK, Trucco J, Valqui TH, Wilson RE, Peters JL	2009	Gene flow in the face of countervailing selection: adaptation to high-altitude hypoxia in the βA hemoglobin subunit of yellow-billed pintails in the Andes	https://www.ncbi.nlm.nih.gov/nuccore/	https://www.ncbi.nlm.nih.gov/nuccore/ FJ618495	NCBI GenBank	FJ618495
McCracken KG, Bulgarella M, Johnson KP, Kuhner MK, Trucco J, Valqui TH, Wilson RE, Peters JL	2009	Gene flow in the face of countervailing selection: adaptation to high-altitude hypoxia in the βA hemoglobin subunit of yellow-billed pintails in the Andes	https://www.ncbi.nlm.nih.gov/nuccore/	https://www.ncbi.nlm.nih.gov/nuccore/ FJ618496	NCBI GenBank	FJ618496
McCracken KG, Bulgarella M, Johnson KP, Kuhner MK, Trucco J, Valqui TH, Wilson RE, Peters JL	2009	Gene flow in the face of countervailing selection: adaptation to high-altitude hypoxia in the βA hemoglobin subunit of yellow-billed pintails in the Andes	https://www.ncbi.nlm.nih.gov/nuccore/	https://www.ncbi.nlm.nih.gov/nuccore/ FJ618497	NCBI GenBank	FJ618497
McCracken KG, Bulgarella M, Johnson KP, Kuhner MK, Trucco J, Valqui TH, Wilson RE, Peters JL	2009	Gene flow in the face of countervailing selection: adaptation to high-altitude hypoxia in the βA hemoglobin subunit of yellow-billed pintails in the Andes	https://www.ncbi.nlm.nih.gov/nuccore/	https://www.ncbi.nlm.nih.gov/nuccore/ FJ618498	NCBI GenBank	FJ618498
McCracken KG, Bulgarella M, Johnson KP, Kuhner MK, Trucco J, Valqui TH, Wilson RE, Peters JL	2009	Gene flow in the face of countervailing selection: adaptation to high-altitude hypoxia in the βA hemoglobin subunit of yellow-billed pintails in the Andes	https://www.ncbi.nlm.nih.gov/nuccore/	https://www.ncbi.nlm.nih.gov/nuccore/ FJ618499	NCBI GenBank	FJ618499
McCracken KG, Bulgarella M, Johnson KP, Kuhner MK, Trucco J, Valqui TH, Wilson RE, Peters JL	2009	Gene flow in the face of countervailing selection: adaptation to high-altitude hypoxia in the βA hemoglobin subunit of yellow-billed pintails in the Andes	https://www.ncbi.nlm.nih.gov/nuccore/	https://www.ncbi.nlm.nih.gov/nuccore/ FJ618500	NCBI GenBank	FJ618500
McCracken KG, Bulgarella M, Johnson KP, Kuhner MK, Trucco J, Valqui TH, Wilson RE, Peters JL	2009	Gene flow in the face of countervailing selection: adaptation to high-altitude hypoxia in the βA hemoglobin subunit of yellow-billed pintails in the Andes	https://www.ncbi.nlm.nih.gov/nuccore/	https://www.ncbi.nlm.nih.gov/nuccore/ FJ618501	NCBI GenBank	FJ618501
McCracken KG, Bulgarella M, Johnson KP, Kuhner MK, Trucco J, Valqui TH, Wilson RE, Peters JL	2009	Gene flow in the face of countervailing selection: adaptation to high-altitude hypoxia in the βA hemoglobin subunit of yellow-billed pintails in the Andes	https://www.ncbi.nlm.nih.gov/nuccore/	https://www.ncbi.nlm.nih.gov/nuccore/ FJ618502	NCBI GenBank	FJ618502
McCracken KG, Bulgarella M, Johnson KP, Kuhner MK, Trucco J, Valqui TH, Wilson RE, Peters JL	2009	Gene flow in the face of countervailing selection: adaptation to high-altitude hypoxia in the βA hemoglobin subunit of yellow-billed pintails in the Andes	https://www.ncbi.nlm.nih.gov/nuccore/	https://www.ncbi.nlm.nih.gov/nuccore/ FJ618503	NCBI GenBank	FJ618503
McCracken KG, Bulgarella M, Johnson KP, Kuhner MK, Trucco J, Valqui TH, Wilson RE, Peters JL	2009	Gene flow in the face of countervailing selection: adaptation to high-altitude hypoxia in the βA hemoglobin subunit of yellow-billed pintails in the Andes	https://www.ncbi.nlm.nih.gov/nuccore/	https://www.ncbi.nlm.nih.gov/nuccore/ FJ618504	NCBI GenBank	FJ618504
McCracken KG, Bulgarella M, Johnson KP, Kuhner MK, Trucco J, Valqui TH, Wilson RE, Peters JL	2009	Gene flow in the face of countervailing selection: adaptation to high-altitude hypoxia in the βA hemoglobin subunit of yellow-billed pintails in the Andes	https://www.ncbi.nlm.nih.gov/nuccore/	https://www.ncbi.nlm.nih.gov/nuccore/ FJ618505	NCBI GenBank	FJ618505
McCracken KG, Bulgarella M, Johnson KP, Kuhner MK, Trucco J, Valqui TH, Wilson RE, Peters JL	2009	Gene flow in the face of countervailing selection: adaptation to high-altitude hypoxia in the βA hemoglobin subunit of yellow-billed pintails in the Andes	https://www.ncbi.nlm.nih.gov/nuccore/	https://www.ncbi.nlm.nih.gov/nuccore/ FJ618506	NCBI GenBank	FJ618506
McCracken KG, Bulgarella M, Johnson KP, Kuhner MK, Trucco J, Valqui TH, Wilson RE, Peters JL	2009	Gene flow in the face of countervailing selection: adaptation to high-altitude hypoxia in the βA hemoglobin subunit of yellow-billed pintails in the Andes	https://www.ncbi.nlm.nih.gov/nuccore/	https://www.ncbi.nlm.nih.gov/nuccore/ FJ618507	NCBI GenBank	FJ618507
McCracken KG, Bulgarella M, Johnson KP, Kuhner MK, Trucco J, Valqui TH, Wilson RE, Peters JL	2009	Gene flow in the face of countervailing selection: adaptation to high-altitude hypoxia in the βA hemoglobin subunit of yellow-billed pintails in the Andes	https://www.ncbi.nlm.nih.gov/nuccore/	https://www.ncbi.nlm.nih.gov/nuccore/ FJ618508	NCBI GenBank	FJ618508
McCracken KG, Bulgarella M, Johnson KP, Kuhner MK, Trucco J, Valqui TH, Wilson RE, Peters JL	2009	Gene flow in the face of countervailing selection: adaptation to high-altitude hypoxia in the βA hemoglobin subunit of yellow-billed pintails in the Andes	https://www.ncbi.nlm.nih.gov/nuccore/	https://www.ncbi.nlm.nih.gov/nuccore/ FJ618509	NCBI GenBank	FJ618509
McCracken KG, Bulgarella M, Johnson KP, Kuhner MK, Trucco J, Valqui TH, Wilson RE, Peters JL	2009	Gene flow in the face of countervailing selection: adaptation to high-altitude hypoxia in the βA hemoglobin subunit of yellow-billed pintails in the Andes	https://www.ncbi.nlm.nih.gov/nuccore/	https://www.ncbi.nlm.nih.gov/nuccore/ FJ618510	NCBI GenBank	FJ618510
McCracken KG, Bulgarella M, Johnson KP, Kuhner MK, Trucco J, Valqui TH, Wilson RE, Peters JL	2009	Gene flow in the face of countervailing selection: adaptation to high-altitude hypoxia in the βA hemoglobin subunit of yellow-billed pintails in the Andes	https://www.ncbi.nlm.nih.gov/nuccore/	https://www.ncbi.nlm.nih.gov/nuccore/ FJ618511	NCBI GenBank	FJ618511
McCracken KG, Bulgarella M, Johnson KP, Kuhner MK, Trucco J, Valqui TH, Wilson RE, Peters JL	2009	Gene flow in the face of countervailing selection: adaptation to high-altitude hypoxia in the βA hemoglobin subunit of yellow-billed pintails in the Andes	https://www.ncbi.nlm.nih.gov/nuccore/	https://www.ncbi.nlm.nih.gov/nuccore/ FJ618512	NCBI GenBank	FJ618512
Wilson RE, Peters JL, McCracken KG	2013	Genetic and phenotypic divergence between low‐and high‐altitude populations of two recently diverged cinnamon teal subspecies	https://www.ncbi.nlm.nih.gov/nuccore/	https://www.ncbi.nlm.nih.gov/nuccore/ JF914653	NCBI GenBank	JF914653
Wilson RE, Peters JL, McCracken KG	2013	Genetic and phenotypic divergence between low‐and high‐altitude populations of two recently diverged cinnamon teal subspecies	https://www.ncbi.nlm.nih.gov/nuccore/	https://www.ncbi.nlm.nih.gov/nuccore/ JF914654	NCBI GenBank	JF914654
Wilson RE, Peters JL, McCracken KG	2013	Genetic and phenotypic divergence between low‐and high‐altitude populations of two recently diverged cinnamon teal subspecies	https://www.ncbi.nlm.nih.gov/nuccore/	https://www.ncbi.nlm.nih.gov/nuccore/ JF914655	NCBI GenBank	JF914655
Wilson RE, Peters JL, McCracken KG	2013	Genetic and phenotypic divergence between low‐and high‐altitude populations of two recently diverged cinnamon teal subspecies	https://www.ncbi.nlm.nih.gov/nuccore/	https://www.ncbi.nlm.nih.gov/nuccore/ JF914656	NCBI GenBank	JF914656
Wilson RE, Peters JL, McCracken KG	2013	Genetic and phenotypic divergence between low‐and high‐altitude populations of two recently diverged cinnamon teal subspecies	https://www.ncbi.nlm.nih.gov/nuccore/	https://www.ncbi.nlm.nih.gov/nuccore/ JF914657	NCBI GenBank	JF914657
Wilson RE, Peters JL, McCracken KG	2013	Genetic and phenotypic divergence between low‐and high‐altitude populations of two recently diverged cinnamon teal subspecies	https://www.ncbi.nlm.nih.gov/nuccore/	https://www.ncbi.nlm.nih.gov/nuccore/ JF914658	NCBI GenBank	JF914658
Wilson RE, Peters JL, McCracken KG	2013	Genetic and phenotypic divergence between low‐and high‐altitude populations of two recently diverged cinnamon teal subspecies	https://www.ncbi.nlm.nih.gov/nuccore/	https://www.ncbi.nlm.nih.gov/nuccore/ JF914659	NCBI GenBank	JF914659
Wilson RE, Peters JL, McCracken KG	2013	Genetic and phenotypic divergence between low‐and high‐altitude populations of two recently diverged cinnamon teal subspecies	https://www.ncbi.nlm.nih.gov/nuccore/	https://www.ncbi.nlm.nih.gov/nuccore/ JF914660	NCBI GenBank	JF914660
Wilson RE, Peters JL, McCracken KG	2013	Genetic and phenotypic divergence between low‐and high‐altitude populations of two recently diverged cinnamon teal subspecies	https://www.ncbi.nlm.nih.gov/nuccore/	https://www.ncbi.nlm.nih.gov/nuccore/ JF914661	NCBI GenBank	JF914661
Wilson RE, Peters JL, McCracken KG	2013	Genetic and phenotypic divergence between low‐and high‐altitude populations of two recently diverged cinnamon teal subspecies	https://www.ncbi.nlm.nih.gov/nuccore/	https://www.ncbi.nlm.nih.gov/nuccore/ JF914662	NCBI GenBank	JF914662
Wilson RE, Peters JL, McCracken KG	2013	Genetic and phenotypic divergence between low‐and high‐altitude populations of two recently diverged cinnamon teal subspecies	https://www.ncbi.nlm.nih.gov/nuccore/	https://www.ncbi.nlm.nih.gov/nuccore/ JF914663	NCBI GenBank	JF914663
Wilson RE, Peters JL, McCracken KG	2013	Genetic and phenotypic divergence between low‐and high‐altitude populations of two recently diverged cinnamon teal subspecies	https://www.ncbi.nlm.nih.gov/nuccore/	https://www.ncbi.nlm.nih.gov/nuccore/ JF914664	NCBI GenBank	JF914664
Wilson RE, Peters JL, McCracken KG	2013	Genetic and phenotypic divergence between low‐and high‐altitude populations of two recently diverged cinnamon teal subspecies	https://www.ncbi.nlm.nih.gov/nuccore/	https://www.ncbi.nlm.nih.gov/nuccore/ JF914665	NCBI GenBank	JF914665
Wilson RE, Peters JL, McCracken KG	2013	Genetic and phenotypic divergence between low‐and high‐altitude populations of two recently diverged cinnamon teal subspecies	https://www.ncbi.nlm.nih.gov/nuccore/	https://www.ncbi.nlm.nih.gov/nuccore/ JF914666	NCBI GenBank	JF914666
Wilson RE, Peters JL, McCracken KG	2013	Genetic and phenotypic divergence between low‐and high‐altitude populations of two recently diverged cinnamon teal subspecies	https://www.ncbi.nlm.nih.gov/nuccore/	https://www.ncbi.nlm.nih.gov/nuccore/ JF914667	NCBI GenBank	JF914667
Wilson RE, Peters JL, McCracken KG	2013	Genetic and phenotypic divergence between low‐and high‐altitude populations of two recently diverged cinnamon teal subspecies	https://www.ncbi.nlm.nih.gov/nuccore/	https://www.ncbi.nlm.nih.gov/nuccore/ JF914668	NCBI GenBank	JF914668
Wilson RE, Peters JL, McCracken KG	2013	Genetic and phenotypic divergence between low‐and high‐altitude populations of two recently diverged cinnamon teal subspecies	https://www.ncbi.nlm.nih.gov/nuccore/	https://www.ncbi.nlm.nih.gov/nuccore/ JF914669	NCBI GenBank	JF914669
Wilson RE, Peters JL, McCracken KG	2013	Genetic and phenotypic divergence between low‐and high‐altitude populations of two recently diverged cinnamon teal subspecies	https://www.ncbi.nlm.nih.gov/nuccore/	https://www.ncbi.nlm.nih.gov/nuccore/ JF914670	NCBI GenBank	JF914670
Wilson RE, Peters JL, McCracken KG	2013	Genetic and phenotypic divergence between low‐and high‐altitude populations of two recently diverged cinnamon teal subspecies	https://www.ncbi.nlm.nih.gov/nuccore/	https://www.ncbi.nlm.nih.gov/nuccore/ JF914671	NCBI GenBank	JF914671
Wilson RE, Peters JL, McCracken KG	2013	Genetic and phenotypic divergence between low‐and high‐altitude populations of two recently diverged cinnamon teal subspecies	https://www.ncbi.nlm.nih.gov/nuccore/	https://www.ncbi.nlm.nih.gov/nuccore/ JF914672	NCBI GenBank	JF914672
Wilson RE, Peters JL, McCracken KG	2013	Genetic and phenotypic divergence between low‐and high‐altitude populations of two recently diverged cinnamon teal subspecies	https://www.ncbi.nlm.nih.gov/nuccore/	https://www.ncbi.nlm.nih.gov/nuccore/ JF914673	NCBI GenBank	JF914673
Wilson RE, Peters JL, McCracken KG	2013	Genetic and phenotypic divergence between low‐and high‐altitude populations of two recently diverged cinnamon teal subspecies	https://www.ncbi.nlm.nih.gov/nuccore/	https://www.ncbi.nlm.nih.gov/nuccore/ JF914674	NCBI GenBank	JF914674
Wilson RE, Peters JL, McCracken KG	2013	Genetic and phenotypic divergence between low‐and high‐altitude populations of two recently diverged cinnamon teal subspecies	https://www.ncbi.nlm.nih.gov/nuccore/	https://www.ncbi.nlm.nih.gov/nuccore/ JF914675	NCBI GenBank	JF914675
Wilson RE, Peters JL, McCracken KG	2013	Genetic and phenotypic divergence between low‐and high‐altitude populations of two recently diverged cinnamon teal subspecies	https://www.ncbi.nlm.nih.gov/nuccore/	https://www.ncbi.nlm.nih.gov/nuccore/ JF914676	NCBI GenBank	JF914676
Wilson RE, Peters JL, McCracken KG	2013	Genetic and phenotypic divergence between low‐and high‐altitude populations of two recently diverged cinnamon teal subspecies	https://www.ncbi.nlm.nih.gov/nuccore/	https://www.ncbi.nlm.nih.gov/nuccore/ JF914677	NCBI GenBank	JF914677
Wilson RE, Peters JL, McCracken KG	2013	Genetic and phenotypic divergence between low‐and high‐altitude populations of two recently diverged cinnamon teal subspecies	https://www.ncbi.nlm.nih.gov/nuccore/	https://www.ncbi.nlm.nih.gov/nuccore/ JF914678	NCBI GenBank	JF914678
Wilson RE, Peters JL, McCracken KG	2013	Genetic and phenotypic divergence between low‐and high‐altitude populations of two recently diverged cinnamon teal subspecies	https://www.ncbi.nlm.nih.gov/nuccore/	https://www.ncbi.nlm.nih.gov/nuccore/ JF914679	NCBI GenBank	JF914679
Wilson RE, Peters JL, McCracken KG	2013	Genetic and phenotypic divergence between low‐and high‐altitude populations of two recently diverged cinnamon teal subspecies	https://www.ncbi.nlm.nih.gov/nuccore/	https://www.ncbi.nlm.nih.gov/nuccore/ JF914680	NCBI GenBank	JF914680
Wilson RE, Peters JL, McCracken KG	2013	Genetic and phenotypic divergence between low‐and high‐altitude populations of two recently diverged cinnamon teal subspecies	https://www.ncbi.nlm.nih.gov/nuccore/	https://www.ncbi.nlm.nih.gov/nuccore/ JF914681	NCBI GenBank	JF914681
Wilson RE, Peters JL, McCracken KG	2013	Genetic and phenotypic divergence between low‐and high‐altitude populations of two recently diverged cinnamon teal subspecies	https://www.ncbi.nlm.nih.gov/nuccore/	https://www.ncbi.nlm.nih.gov/nuccore/ JF914682	NCBI GenBank	JF914682
Wilson RE, Peters JL, McCracken KG	2013	Genetic and phenotypic divergence between low‐and high‐altitude populations of two recently diverged cinnamon teal subspecies	https://www.ncbi.nlm.nih.gov/nuccore/	https://www.ncbi.nlm.nih.gov/nuccore/ JF914683	NCBI GenBank	JF914683
Wilson RE, Peters JL, McCracken KG	2013	Genetic and phenotypic divergence between low‐and high‐altitude populations of two recently diverged cinnamon teal subspecies	https://www.ncbi.nlm.nih.gov/nuccore/	https://www.ncbi.nlm.nih.gov/nuccore/ JF914684	NCBI GenBank	JF914684
Wilson RE, Peters JL, McCracken KG	2013	Genetic and phenotypic divergence between low‐and high‐altitude populations of two recently diverged cinnamon teal subspecies	https://www.ncbi.nlm.nih.gov/nuccore/	https://www.ncbi.nlm.nih.gov/nuccore/ JF914685	NCBI GenBank	JF914685
Wilson RE, Peters JL, McCracken KG	2013	Genetic and phenotypic divergence between low‐and high‐altitude populations of two recently diverged cinnamon teal subspecies	https://www.ncbi.nlm.nih.gov/nuccore/	https://www.ncbi.nlm.nih.gov/nuccore/ JF914686	NCBI GenBank	JF914686
Wilson RE, Peters JL, McCracken KG	2013	Genetic and phenotypic divergence between low‐and high‐altitude populations of two recently diverged cinnamon teal subspecies	https://www.ncbi.nlm.nih.gov/nuccore/	https://www.ncbi.nlm.nih.gov/nuccore/ JF914687	NCBI GenBank	JF914687
Wilson RE, Peters JL, McCracken KG	2013	Genetic and phenotypic divergence between low‐and high‐altitude populations of two recently diverged cinnamon teal subspecies	https://www.ncbi.nlm.nih.gov/nuccore/	https://www.ncbi.nlm.nih.gov/nuccore/ JF914688	NCBI GenBank	JF914688
Wilson RE, Peters JL, McCracken KG	2013	Genetic and phenotypic divergence between low‐and high‐altitude populations of two recently diverged cinnamon teal subspecies	https://www.ncbi.nlm.nih.gov/nuccore/	https://www.ncbi.nlm.nih.gov/nuccore/ JF914689	NCBI GenBank	JF914689
Wilson RE, Peters JL, McCracken KG	2013	Genetic and phenotypic divergence between low‐and high‐altitude populations of two recently diverged cinnamon teal subspecies	https://www.ncbi.nlm.nih.gov/nuccore/	https://www.ncbi.nlm.nih.gov/nuccore/ JF914690	NCBI GenBank	JF914690
Wilson RE, Peters JL, McCracken KG	2013	Genetic and phenotypic divergence between low‐and high‐altitude populations of two recently diverged cinnamon teal subspecies	https://www.ncbi.nlm.nih.gov/nuccore/	https://www.ncbi.nlm.nih.gov/nuccore/ JF914691	NCBI GenBank	JF914691
Wilson RE, Peters JL, McCracken KG	2013	Genetic and phenotypic divergence between low‐and high‐altitude populations of two recently diverged cinnamon teal subspecies	https://www.ncbi.nlm.nih.gov/nuccore/	https://www.ncbi.nlm.nih.gov/nuccore/ JF914692	NCBI GenBank	JF914692
Wilson RE, Peters JL, McCracken KG	2013	Genetic and phenotypic divergence between low‐and high‐altitude populations of two recently diverged cinnamon teal subspecies	https://www.ncbi.nlm.nih.gov/nuccore/	https://www.ncbi.nlm.nih.gov/nuccore/ JF914693	NCBI GenBank	JF914693
Wilson RE, Peters JL, McCracken KG	2013	Genetic and phenotypic divergence between low‐and high‐altitude populations of two recently diverged cinnamon teal subspecies	https://www.ncbi.nlm.nih.gov/nuccore/	https://www.ncbi.nlm.nih.gov/nuccore/ JF914694	NCBI GenBank	JF914694
Wilson RE, Peters JL, McCracken KG	2013	Genetic and phenotypic divergence between low‐and high‐altitude populations of two recently diverged cinnamon teal subspecies	https://www.ncbi.nlm.nih.gov/nuccore/	https://www.ncbi.nlm.nih.gov/nuccore/ JF914695	NCBI GenBank	JF914695
Wilson RE, Peters JL, McCracken KG	2013	Genetic and phenotypic divergence between low‐and high‐altitude populations of two recently diverged cinnamon teal subspecies	https://www.ncbi.nlm.nih.gov/nuccore/	https://www.ncbi.nlm.nih.gov/nuccore/ JF914696	NCBI GenBank	JF914696
Wilson RE, Peters JL, McCracken KG	2013	Genetic and phenotypic divergence between low‐and high‐altitude populations of two recently diverged cinnamon teal subspecies	https://www.ncbi.nlm.nih.gov/nuccore/	https://www.ncbi.nlm.nih.gov/nuccore/ JF914697	NCBI GenBank	JF914697
Wilson RE, Peters JL, McCracken KG	2013	Genetic and phenotypic divergence between low‐and high‐altitude populations of two recently diverged cinnamon teal subspecies	https://www.ncbi.nlm.nih.gov/nuccore/	https://www.ncbi.nlm.nih.gov/nuccore/ JF914698	NCBI GenBank	JF914698
Wilson RE, Peters JL, McCracken KG	2013	Genetic and phenotypic divergence between low‐and high‐altitude populations of two recently diverged cinnamon teal subspecies	https://www.ncbi.nlm.nih.gov/nuccore/	https://www.ncbi.nlm.nih.gov/nuccore/ JF914699	NCBI GenBank	JF914699
Wilson RE, Peters JL, McCracken KG	2013	Genetic and phenotypic divergence between low‐and high‐altitude populations of two recently diverged cinnamon teal subspecies	https://www.ncbi.nlm.nih.gov/nuccore/	https://www.ncbi.nlm.nih.gov/nuccore/ JF914700	NCBI GenBank	JF914700
Wilson RE, Peters JL, McCracken KG	2013	Genetic and phenotypic divergence between low‐and high‐altitude populations of two recently diverged cinnamon teal subspecies	https://www.ncbi.nlm.nih.gov/nuccore/	https://www.ncbi.nlm.nih.gov/nuccore/ JF914701	NCBI GenBank	JF914701
Wilson RE, Peters JL, McCracken KG	2013	Genetic and phenotypic divergence between low‐and high‐altitude populations of two recently diverged cinnamon teal subspecies	https://www.ncbi.nlm.nih.gov/nuccore/	https://www.ncbi.nlm.nih.gov/nuccore/ JF914702	NCBI GenBank	JF914702
Wilson RE, Peters JL, McCracken KG	2013	Genetic and phenotypic divergence between low‐and high‐altitude populations of two recently diverged cinnamon teal subspecies	https://www.ncbi.nlm.nih.gov/nuccore/	https://www.ncbi.nlm.nih.gov/nuccore/ JF914703	NCBI GenBank	JF914703
Wilson RE, Peters JL, McCracken KG	2013	Genetic and phenotypic divergence between low‐and high‐altitude populations of two recently diverged cinnamon teal subspecies	https://www.ncbi.nlm.nih.gov/nuccore/	https://www.ncbi.nlm.nih.gov/nuccore/ JF914704	NCBI GenBank	JF914704
Wilson RE, Peters JL, McCracken KG	2013	Genetic and phenotypic divergence between low‐and high‐altitude populations of two recently diverged cinnamon teal subspecies	https://www.ncbi.nlm.nih.gov/nuccore/	https://www.ncbi.nlm.nih.gov/nuccore/ JF914705	NCBI GenBank	JF914705
Wilson RE, Peters JL, McCracken KG	2013	Genetic and phenotypic divergence between low‐and high‐altitude populations of two recently diverged cinnamon teal subspecies	https://www.ncbi.nlm.nih.gov/nuccore/	https://www.ncbi.nlm.nih.gov/nuccore/ JF914706	NCBI GenBank	JF914706
Wilson RE, Peters JL, McCracken KG	2013	Genetic and phenotypic divergence between low‐and high‐altitude populations of two recently diverged cinnamon teal subspecies	https://www.ncbi.nlm.nih.gov/nuccore/	https://www.ncbi.nlm.nih.gov/nuccore/ JF914707	NCBI GenBank	JF914707
Wilson RE, Peters JL, McCracken KG	2013	Genetic and phenotypic divergence between low‐and high‐altitude populations of two recently diverged cinnamon teal subspecies	https://www.ncbi.nlm.nih.gov/nuccore/	https://www.ncbi.nlm.nih.gov/nuccore/ JF914708	NCBI GenBank	JF914708
Wilson RE, Peters JL, McCracken KG	2013	Genetic and phenotypic divergence between low‐and high‐altitude populations of two recently diverged cinnamon teal subspecies	https://www.ncbi.nlm.nih.gov/nuccore/	https://www.ncbi.nlm.nih.gov/nuccore/ JF914709	NCBI GenBank	JF914709
Wilson RE, Peters JL, McCracken KG	2013	Genetic and phenotypic divergence between low‐and high‐altitude populations of two recently diverged cinnamon teal subspecies	https://www.ncbi.nlm.nih.gov/nuccore/	https://www.ncbi.nlm.nih.gov/nuccore/ JF914710	NCBI GenBank	JF914710
Wilson RE, Peters JL, McCracken KG	2013	Genetic and phenotypic divergence between low‐and high‐altitude populations of two recently diverged cinnamon teal subspecies	https://www.ncbi.nlm.nih.gov/nuccore/	https://www.ncbi.nlm.nih.gov/nuccore/ JF914711	NCBI GenBank	JF914711
Wilson RE, Peters JL, McCracken KG	2013	Genetic and phenotypic divergence between low‐and high‐altitude populations of two recently diverged cinnamon teal subspecies	https://www.ncbi.nlm.nih.gov/nuccore/	https://www.ncbi.nlm.nih.gov/nuccore/ JF914712	NCBI GenBank	JF914712
Wilson RE, Peters JL, McCracken KG	2013	Genetic and phenotypic divergence between low‐and high‐altitude populations of two recently diverged cinnamon teal subspecies	https://www.ncbi.nlm.nih.gov/nuccore/	https://www.ncbi.nlm.nih.gov/nuccore/ JF914713	NCBI GenBank	JF914713
Wilson RE, Peters JL, McCracken KG	2013	Genetic and phenotypic divergence between low‐and high‐altitude populations of two recently diverged cinnamon teal subspecies	https://www.ncbi.nlm.nih.gov/nuccore/	https://www.ncbi.nlm.nih.gov/nuccore/ JF914714	NCBI GenBank	JF914714
Wilson RE, Peters JL, McCracken KG	2013	Genetic and phenotypic divergence between low‐and high‐altitude populations of two recently diverged cinnamon teal subspecies	https://www.ncbi.nlm.nih.gov/nuccore/	https://www.ncbi.nlm.nih.gov/nuccore/ JF914715	NCBI GenBank	JF914715
Wilson RE, Peters JL, McCracken KG	2013	Genetic and phenotypic divergence between low‐and high‐altitude populations of two recently diverged cinnamon teal subspecies	https://www.ncbi.nlm.nih.gov/nuccore/	https://www.ncbi.nlm.nih.gov/nuccore/ JF914716	NCBI GenBank	JF914716
Wilson RE, Peters JL, McCracken KG	2013	Genetic and phenotypic divergence between low‐and high‐altitude populations of two recently diverged cinnamon teal subspecies	https://www.ncbi.nlm.nih.gov/nuccore/	https://www.ncbi.nlm.nih.gov/nuccore/ JF914717	NCBI GenBank	JF914717
Wilson RE, Peters JL, McCracken KG	2013	Genetic and phenotypic divergence between low‐and high‐altitude populations of two recently diverged cinnamon teal subspecies	https://www.ncbi.nlm.nih.gov/nuccore/	https://www.ncbi.nlm.nih.gov/nuccore/ JF914718	NCBI GenBank	JF914718
Wilson RE, Peters JL, McCracken KG	2013	Genetic and phenotypic divergence between low‐and high‐altitude populations of two recently diverged cinnamon teal subspecies	https://www.ncbi.nlm.nih.gov/nuccore/	https://www.ncbi.nlm.nih.gov/nuccore/ JF914719	NCBI GenBank	JF914719
Wilson RE, Peters JL, McCracken KG	2013	Genetic and phenotypic divergence between low‐and high‐altitude populations of two recently diverged cinnamon teal subspecies	https://www.ncbi.nlm.nih.gov/nuccore/	https://www.ncbi.nlm.nih.gov/nuccore/ JF914720	NCBI GenBank	JF914720
Wilson RE, Peters JL, McCracken KG	2013	Genetic and phenotypic divergence between low‐and high‐altitude populations of two recently diverged cinnamon teal subspecies	https://www.ncbi.nlm.nih.gov/nuccore/	https://www.ncbi.nlm.nih.gov/nuccore/ JF914721	NCBI GenBank	JF914721
Wilson RE, Peters JL, McCracken KG	2013	Genetic and phenotypic divergence between low‐and high‐altitude populations of two recently diverged cinnamon teal subspecies	https://www.ncbi.nlm.nih.gov/nuccore/	https://www.ncbi.nlm.nih.gov/nuccore/ JF914722	NCBI GenBank	JF914722
Wilson RE, Peters JL, McCracken KG	2013	Genetic and phenotypic divergence between low‐and high‐altitude populations of two recently diverged cinnamon teal subspecies	https://www.ncbi.nlm.nih.gov/nuccore/	https://www.ncbi.nlm.nih.gov/nuccore/ JF914723	NCBI GenBank	JF914723
Wilson RE, Peters JL, McCracken KG	2013	Genetic and phenotypic divergence between low‐and high‐altitude populations of two recently diverged cinnamon teal subspecies	https://www.ncbi.nlm.nih.gov/nuccore/	https://www.ncbi.nlm.nih.gov/nuccore/ JF914724	NCBI GenBank	JF914724
Wilson RE, Peters JL, McCracken KG	2013	Genetic and phenotypic divergence between low‐and high‐altitude populations of two recently diverged cinnamon teal subspecies	https://www.ncbi.nlm.nih.gov/nuccore/	https://www.ncbi.nlm.nih.gov/nuccore/ JF914725	NCBI GenBank	JF914725
Wilson RE, Peters JL, McCracken KG	2013	Genetic and phenotypic divergence between low‐and high‐altitude populations of two recently diverged cinnamon teal subspecies	https://www.ncbi.nlm.nih.gov/nuccore/	https://www.ncbi.nlm.nih.gov/nuccore/ JF914726	NCBI GenBank	JF914726
Wilson RE, Peters JL, McCracken KG	2013	Genetic and phenotypic divergence between low‐and high‐altitude populations of two recently diverged cinnamon teal subspecies	https://www.ncbi.nlm.nih.gov/nuccore/	https://www.ncbi.nlm.nih.gov/nuccore/ JF914727	NCBI GenBank	JF914727
Wilson RE, Peters JL, McCracken KG	2013	Genetic and phenotypic divergence between low‐and high‐altitude populations of two recently diverged cinnamon teal subspecies	https://www.ncbi.nlm.nih.gov/nuccore/	https://www.ncbi.nlm.nih.gov/nuccore/ JF914728	NCBI GenBank	JF914728
Wilson RE, Peters JL, McCracken KG	2013	Genetic and phenotypic divergence between low‐and high‐altitude populations of two recently diverged cinnamon teal subspecies	https://www.ncbi.nlm.nih.gov/nuccore/	https://www.ncbi.nlm.nih.gov/nuccore/ JF914729	NCBI GenBank	JF914729
Wilson RE, Peters JL, McCracken KG	2013	Genetic and phenotypic divergence between low‐and high‐altitude populations of two recently diverged cinnamon teal subspecies	https://www.ncbi.nlm.nih.gov/nuccore/	https://www.ncbi.nlm.nih.gov/nuccore/ JF914730	NCBI GenBank	JF914730
Wilson RE, Peters JL, McCracken KG	2013	Genetic and phenotypic divergence between low‐and high‐altitude populations of two recently diverged cinnamon teal subspecies	https://www.ncbi.nlm.nih.gov/nuccore/	https://www.ncbi.nlm.nih.gov/nuccore/ JF914731	NCBI GenBank	JF914731
Wilson RE, Peters JL, McCracken KG	2013	Genetic and phenotypic divergence between low‐and high‐altitude populations of two recently diverged cinnamon teal subspecies	https://www.ncbi.nlm.nih.gov/nuccore/	https://www.ncbi.nlm.nih.gov/nuccore/ JF914732	NCBI GenBank	JF914732
Wilson RE, Peters JL, McCracken KG	2013	Genetic and phenotypic divergence between low‐and high‐altitude populations of two recently diverged cinnamon teal subspecies	https://www.ncbi.nlm.nih.gov/nuccore/	https://www.ncbi.nlm.nih.gov/nuccore/ JF914733	NCBI GenBank	JF914733
Wilson RE, Peters JL, McCracken KG	2013	Genetic and phenotypic divergence between low‐and high‐altitude populations of two recently diverged cinnamon teal subspecies	https://www.ncbi.nlm.nih.gov/nuccore/	https://www.ncbi.nlm.nih.gov/nuccore/ JF914734	NCBI GenBank	JF914734
Wilson RE, Peters JL, McCracken KG	2013	Genetic and phenotypic divergence between low‐and high‐altitude populations of two recently diverged cinnamon teal subspecies	https://www.ncbi.nlm.nih.gov/nuccore/	https://www.ncbi.nlm.nih.gov/nuccore/ JF914735	NCBI GenBank	JF914735
Wilson RE, Peters JL, McCracken KG	2013	Genetic and phenotypic divergence between low‐and high‐altitude populations of two recently diverged cinnamon teal subspecies	https://www.ncbi.nlm.nih.gov/nuccore/	https://www.ncbi.nlm.nih.gov/nuccore/ JF914736	NCBI GenBank	JF914736
Wilson RE, Peters JL, McCracken KG	2013	Genetic and phenotypic divergence between low‐and high‐altitude populations of two recently diverged cinnamon teal subspecies	https://www.ncbi.nlm.nih.gov/nuccore/	https://www.ncbi.nlm.nih.gov/nuccore/ JF914737	NCBI GenBank	JF914737
Wilson RE, Peters JL, McCracken KG	2013	Genetic and phenotypic divergence between low‐and high‐altitude populations of two recently diverged cinnamon teal subspecies	https://www.ncbi.nlm.nih.gov/nuccore/	https://www.ncbi.nlm.nih.gov/nuccore/ JF914738	NCBI GenBank	JF914738
Wilson RE, Peters JL, McCracken KG	2013	Genetic and phenotypic divergence between low‐and high‐altitude populations of two recently diverged cinnamon teal subspecies	https://www.ncbi.nlm.nih.gov/nuccore/	https://www.ncbi.nlm.nih.gov/nuccore/ JF914739	NCBI GenBank	JF914739
Wilson RE, Peters JL, McCracken KG	2013	Genetic and phenotypic divergence between low‐and high‐altitude populations of two recently diverged cinnamon teal subspecies	https://www.ncbi.nlm.nih.gov/nuccore/	https://www.ncbi.nlm.nih.gov/nuccore/ JF914740	NCBI GenBank	JF914740
Wilson RE, Peters JL, McCracken KG	2013	Genetic and phenotypic divergence between low‐and high‐altitude populations of two recently diverged cinnamon teal subspecies	https://www.ncbi.nlm.nih.gov/nuccore/	https://www.ncbi.nlm.nih.gov/nuccore/ JF914741	NCBI GenBank	JF914741
Wilson RE, Peters JL, McCracken KG	2013	Genetic and phenotypic divergence between low‐and high‐altitude populations of two recently diverged cinnamon teal subspecies	https://www.ncbi.nlm.nih.gov/nuccore/	https://www.ncbi.nlm.nih.gov/nuccore/ JF914742	NCBI GenBank	JF914742
Wilson RE, Peters JL, McCracken KG	2013	Genetic and phenotypic divergence between low‐and high‐altitude populations of two recently diverged cinnamon teal subspecies	https://www.ncbi.nlm.nih.gov/nuccore/	https://www.ncbi.nlm.nih.gov/nuccore/ JF914743	NCBI GenBank	JF914743
Wilson RE, Peters JL, McCracken KG	2013	Genetic and phenotypic divergence between low‐and high‐altitude populations of two recently diverged cinnamon teal subspecies	https://www.ncbi.nlm.nih.gov/nuccore/	https://www.ncbi.nlm.nih.gov/nuccore/ JF914744	NCBI GenBank	JF914744
Wilson RE, Peters JL, McCracken KG	2013	Genetic and phenotypic divergence between low‐and high‐altitude populations of two recently diverged cinnamon teal subspecies	https://www.ncbi.nlm.nih.gov/nuccore/	https://www.ncbi.nlm.nih.gov/nuccore/ JF914745	NCBI GenBank	JF914745
Wilson RE, Peters JL, McCracken KG	2013	Genetic and phenotypic divergence between low‐and high‐altitude populations of two recently diverged cinnamon teal subspecies	https://www.ncbi.nlm.nih.gov/nuccore/	https://www.ncbi.nlm.nih.gov/nuccore/ JF914746	NCBI GenBank	JF914746
Wilson RE, Peters JL, McCracken KG	2013	Genetic and phenotypic divergence between low‐and high‐altitude populations of two recently diverged cinnamon teal subspecies	https://www.ncbi.nlm.nih.gov/nuccore/	https://www.ncbi.nlm.nih.gov/nuccore/ JF914747	NCBI GenBank	JF914747
Wilson RE, Peters JL, McCracken KG	2013	Genetic and phenotypic divergence between low‐and high‐altitude populations of two recently diverged cinnamon teal subspecies	https://www.ncbi.nlm.nih.gov/nuccore/	https://www.ncbi.nlm.nih.gov/nuccore/ JF914748	NCBI GenBank	JF914748
Wilson RE, Peters JL, McCracken KG	2013	Genetic and phenotypic divergence between low‐and high‐altitude populations of two recently diverged cinnamon teal subspecies	https://www.ncbi.nlm.nih.gov/nuccore/	https://www.ncbi.nlm.nih.gov/nuccore/ JF914749	NCBI GenBank	JF914749
Wilson RE, Peters JL, McCracken KG	2013	Genetic and phenotypic divergence between low‐and high‐altitude populations of two recently diverged cinnamon teal subspecies	https://www.ncbi.nlm.nih.gov/nuccore/	https://www.ncbi.nlm.nih.gov/nuccore/ JF914750	NCBI GenBank	JF914750
Wilson RE, Peters JL, McCracken KG	2013	Genetic and phenotypic divergence between low‐and high‐altitude populations of two recently diverged cinnamon teal subspecies	https://www.ncbi.nlm.nih.gov/nuccore/	https://www.ncbi.nlm.nih.gov/nuccore/ JF914751	NCBI GenBank	JF914751
Wilson RE, Peters JL, McCracken KG	2013	Genetic and phenotypic divergence between low‐and high‐altitude populations of two recently diverged cinnamon teal subspecies	https://www.ncbi.nlm.nih.gov/nuccore/	https://www.ncbi.nlm.nih.gov/nuccore/ JF914752	NCBI GenBank	JF914752
Wilson RE, Peters JL, McCracken KG	2013	Genetic and phenotypic divergence between low‐and high‐altitude populations of two recently diverged cinnamon teal subspecies	https://www.ncbi.nlm.nih.gov/nuccore/	https://www.ncbi.nlm.nih.gov/nuccore/ JF914753	NCBI GenBank	JF914753
Wilson RE, Peters JL, McCracken KG	2013	Genetic and phenotypic divergence between low‐and high‐altitude populations of two recently diverged cinnamon teal subspecies	https://www.ncbi.nlm.nih.gov/nuccore/	https://www.ncbi.nlm.nih.gov/nuccore/ JF914754	NCBI GenBank	JF914754
Wilson RE, Peters JL, McCracken KG	2013	Stepwise colonization of the Andes by Ruddy Ducks and the evolution of novel β‐globin variants	https://www.ncbi.nlm.nih.gov/nuccore/	https://www.ncbi.nlm.nih.gov/nuccore/ AY747742	NCBI GenBank	AY747742
Wilson RE, Peters JL, McCracken KG	2013	Stepwise colonization of the Andes by Ruddy Ducks and the evolution of novel β‐globin variants	https://www.ncbi.nlm.nih.gov/nuccore/	https://www.ncbi.nlm.nih.gov/nuccore/ AY747743	NCBI GenBank	AY747743
Wilson RE, Peters JL, McCracken KG	2013	Stepwise colonization of the Andes by Ruddy Ducks and the evolution of novel β‐globin variants	https://www.ncbi.nlm.nih.gov/nuccore/	https://www.ncbi.nlm.nih.gov/nuccore/ AY747744	NCBI GenBank	AY747744
Wilson RE, Peters JL, McCracken KG	2013	Stepwise colonization of the Andes by Ruddy Ducks and the evolution of novel β‐globin variants	https://www.ncbi.nlm.nih.gov/nuccore/	https://www.ncbi.nlm.nih.gov/nuccore/ AY747745	NCBI GenBank	AY747745
Wilson RE, Peters JL, McCracken KG	2013	Stepwise colonization of the Andes by Ruddy Ducks and the evolution of novel β‐globin variants	https://www.ncbi.nlm.nih.gov/nuccore/	https://www.ncbi.nlm.nih.gov/nuccore/ AY747746	NCBI GenBank	AY747746
Wilson RE, Peters JL, McCracken KG	2013	Stepwise colonization of the Andes by Ruddy Ducks and the evolution of novel β‐globin variants	https://www.ncbi.nlm.nih.gov/nuccore/	https://www.ncbi.nlm.nih.gov/nuccore/ AY747747	NCBI GenBank	AY747747
Wilson RE, Peters JL, McCracken KG	2013	Stepwise colonization of the Andes by Ruddy Ducks and the evolution of novel β‐globin variants	https://www.ncbi.nlm.nih.gov/nuccore/	https://www.ncbi.nlm.nih.gov/nuccore/ AY747748	NCBI GenBank	AY747748
Wilson RE, Peters JL, McCracken KG	2013	Stepwise colonization of the Andes by Ruddy Ducks and the evolution of novel β‐globin variants	https://www.ncbi.nlm.nih.gov/nuccore/	https://www.ncbi.nlm.nih.gov/nuccore/ AY747749	NCBI GenBank	AY747749
Wilson RE, Peters JL, McCracken KG	2013	Stepwise colonization of the Andes by Ruddy Ducks and the evolution of novel β‐globin variants	https://www.ncbi.nlm.nih.gov/nuccore/	https://www.ncbi.nlm.nih.gov/nuccore/ AY747750	NCBI GenBank	AY747750
Wilson RE, Peters JL, McCracken KG	2013	Stepwise colonization of the Andes by Ruddy Ducks and the evolution of novel β‐globin variants	https://www.ncbi.nlm.nih.gov/nuccore/	https://www.ncbi.nlm.nih.gov/nuccore/ AY747751	NCBI GenBank	AY747751
Wilson RE, Peters JL, McCracken KG	2013	Stepwise colonization of the Andes by Ruddy Ducks and the evolution of novel β‐globin variants	https://www.ncbi.nlm.nih.gov/nuccore/	https://www.ncbi.nlm.nih.gov/nuccore/ AY747756	NCBI GenBank	AY747756
Wilson RE, Peters JL, McCracken KG	2013	Stepwise colonization of the Andes by Ruddy Ducks and the evolution of novel β‐globin variants	https://www.ncbi.nlm.nih.gov/nuccore/	https://www.ncbi.nlm.nih.gov/nuccore/ AY747757	NCBI GenBank	AY747757
Wilson RE, Peters JL, McCracken KG	2013	Stepwise colonization of the Andes by Ruddy Ducks and the evolution of novel β‐globin variants	https://www.ncbi.nlm.nih.gov/nuccore/	https://www.ncbi.nlm.nih.gov/nuccore/ AY747758	NCBI GenBank	AY747758
Wilson RE, Peters JL, McCracken KG	2013	Stepwise colonization of the Andes by Ruddy Ducks and the evolution of novel β‐globin variants	https://www.ncbi.nlm.nih.gov/nuccore/	https://www.ncbi.nlm.nih.gov/nuccore/ AY747759	NCBI GenBank	AY747759
Wilson RE, Peters JL, McCracken KG	2013	Stepwise colonization of the Andes by Ruddy Ducks and the evolution of novel β‐globin variants	https://www.ncbi.nlm.nih.gov/nuccore/	https://www.ncbi.nlm.nih.gov/nuccore/ AY747760	NCBI GenBank	AY747760
Wilson RE, Peters JL, McCracken KG	2013	Stepwise colonization of the Andes by Ruddy Ducks and the evolution of novel β‐globin variants	https://www.ncbi.nlm.nih.gov/nuccore/	https://www.ncbi.nlm.nih.gov/nuccore/ AY747761	NCBI GenBank	AY747761
Wilson RE, Peters JL, McCracken KG	2013	Stepwise colonization of the Andes by Ruddy Ducks and the evolution of novel β‐globin variants	https://www.ncbi.nlm.nih.gov/nuccore/	https://www.ncbi.nlm.nih.gov/nuccore/ AY747762	NCBI GenBank	AY747762
Wilson RE, Peters JL, McCracken KG	2013	Stepwise colonization of the Andes by Ruddy Ducks and the evolution of novel β‐globin variants	https://www.ncbi.nlm.nih.gov/nuccore/	https://www.ncbi.nlm.nih.gov/nuccore/ AY747763	NCBI GenBank	AY747763
Wilson RE, Peters JL, McCracken KG	2013	Stepwise colonization of the Andes by Ruddy Ducks and the evolution of novel β‐globin variants	https://www.ncbi.nlm.nih.gov/nuccore/	https://www.ncbi.nlm.nih.gov/nuccore/ AY747764	NCBI GenBank	AY747764
Wilson RE, Peters JL, McCracken KG	2013	Stepwise colonization of the Andes by Ruddy Ducks and the evolution of novel β‐globin variants	https://www.ncbi.nlm.nih.gov/nuccore/	https://www.ncbi.nlm.nih.gov/nuccore/ AY747765	NCBI GenBank	AY747765
Wilson RE, Peters JL, McCracken KG	2013	Stepwise colonization of the Andes by Ruddy Ducks and the evolution of novel β‐globin variants	https://www.ncbi.nlm.nih.gov/nuccore/	https://www.ncbi.nlm.nih.gov/nuccore/ AY747766	NCBI GenBank	AY747766
Wilson RE, Peters JL, McCracken KG	2013	Stepwise colonization of the Andes by Ruddy Ducks and the evolution of novel β‐globin variants	https://www.ncbi.nlm.nih.gov/nuccore/	https://www.ncbi.nlm.nih.gov/nuccore/ AY747767	NCBI GenBank	AY747767
Wilson RE, Peters JL, McCracken KG	2013	Stepwise colonization of the Andes by Ruddy Ducks and the evolution of novel β‐globin variants	https://www.ncbi.nlm.nih.gov/nuccore/	https://www.ncbi.nlm.nih.gov/nuccore/ AY747768	NCBI GenBank	AY747768
Wilson RE, Peters JL, McCracken KG	2013	Stepwise colonization of the Andes by Ruddy Ducks and the evolution of novel β‐globin variants	https://www.ncbi.nlm.nih.gov/nuccore/	https://www.ncbi.nlm.nih.gov/nuccore/ AY747769	NCBI GenBank	AY747769
Wilson RE, Peters JL, McCracken KG	2013	Stepwise colonization of the Andes by Ruddy Ducks and the evolution of novel β‐globin variants	https://www.ncbi.nlm.nih.gov/nuccore/	https://www.ncbi.nlm.nih.gov/nuccore/ AY747770	NCBI GenBank	AY747770
Wilson RE, Peters JL, McCracken KG	2013	Stepwise colonization of the Andes by Ruddy Ducks and the evolution of novel β‐globin variants	https://www.ncbi.nlm.nih.gov/nuccore/	https://www.ncbi.nlm.nih.gov/nuccore/ AY747771	NCBI GenBank	AY747771
Wilson RE, Peters JL, McCracken KG	2013	Stepwise colonization of the Andes by Ruddy Ducks and the evolution of novel β‐globin variants	https://www.ncbi.nlm.nih.gov/nuccore/	https://www.ncbi.nlm.nih.gov/nuccore/ AY747772	NCBI GenBank	AY747772
Wilson RE, Peters JL, McCracken KG	2013	Stepwise colonization of the Andes by Ruddy Ducks and the evolution of novel β‐globin variants	https://www.ncbi.nlm.nih.gov/nuccore/	https://www.ncbi.nlm.nih.gov/nuccore/ AY747773	NCBI GenBank	AY747773
Wilson RE, Peters JL, McCracken KG	2013	Stepwise colonization of the Andes by Ruddy Ducks and the evolution of novel β‐globin variants	https://www.ncbi.nlm.nih.gov/nuccore/	https://www.ncbi.nlm.nih.gov/nuccore/ AY747774	NCBI GenBank	AY747774
Wilson RE, Peters JL, McCracken KG	2013	Stepwise colonization of the Andes by Ruddy Ducks and the evolution of novel β‐globin variants	https://www.ncbi.nlm.nih.gov/nuccore/	https://www.ncbi.nlm.nih.gov/nuccore/ AY747775	NCBI GenBank	AY747775
Wilson RE, Peters JL, McCracken KG	2013	Stepwise colonization of the Andes by Ruddy Ducks and the evolution of novel β‐globin variants	https://www.ncbi.nlm.nih.gov/nuccore/	https://www.ncbi.nlm.nih.gov/nuccore/ AY747776	NCBI GenBank	AY747776
Wilson RE, Peters JL, McCracken KG	2013	Stepwise colonization of the Andes by Ruddy Ducks and the evolution of novel β‐globin variants	https://www.ncbi.nlm.nih.gov/nuccore/	https://www.ncbi.nlm.nih.gov/nuccore/ AY747777	NCBI GenBank	AY747777
Wilson RE, Peters JL, McCracken KG	2013	Stepwise colonization of the Andes by Ruddy Ducks and the evolution of novel β‐globin variants	https://www.ncbi.nlm.nih.gov/nuccore/	https://www.ncbi.nlm.nih.gov/nuccore/ AY747778	NCBI GenBank	AY747778
Wilson RE, Peters JL, McCracken KG	2013	Stepwise colonization of the Andes by Ruddy Ducks and the evolution of novel β‐globin variants	https://www.ncbi.nlm.nih.gov/nuccore/	https://www.ncbi.nlm.nih.gov/nuccore/ AM084943	NCBI GenBank	AM084943
Wilson RE, Peters JL, McCracken KG	2013	Stepwise colonization of the Andes by Ruddy Ducks and the evolution of novel β‐globin variants	https://www.ncbi.nlm.nih.gov/nuccore/	https://www.ncbi.nlm.nih.gov/nuccore/ AM084944	NCBI GenBank	AM084944
Wilson RE, Peters JL, McCracken KG	2013	Stepwise colonization of the Andes by Ruddy Ducks and the evolution of novel β‐globin variants	https://www.ncbi.nlm.nih.gov/nuccore/	https://www.ncbi.nlm.nih.gov/nuccore/ AM084945	NCBI GenBank	AM084945
Wilson RE, Peters JL, McCracken KG	2013	Stepwise colonization of the Andes by Ruddy Ducks and the evolution of novel β‐globin variants	https://www.ncbi.nlm.nih.gov/nuccore/	https://www.ncbi.nlm.nih.gov/nuccore/ AM084946	NCBI GenBank	AM084946
Wilson RE, Peters JL, McCracken KG	2013	Stepwise colonization of the Andes by Ruddy Ducks and the evolution of novel β‐globin variants	https://www.ncbi.nlm.nih.gov/nuccore/	https://www.ncbi.nlm.nih.gov/nuccore/ AM084947	NCBI GenBank	AM084947
Wilson RE, Peters JL, McCracken KG	2013	Stepwise colonization of the Andes by Ruddy Ducks and the evolution of novel β‐globin variants	https://www.ncbi.nlm.nih.gov/nuccore/	https://www.ncbi.nlm.nih.gov/nuccore/ AM084948	NCBI GenBank	AM084948
Wilson RE, Peters JL, McCracken KG	2013	Stepwise colonization of the Andes by Ruddy Ducks and the evolution of novel β‐globin variants	https://www.ncbi.nlm.nih.gov/nuccore/	https://www.ncbi.nlm.nih.gov/nuccore/ AM084949	NCBI GenBank	AM084949
Wilson RE, Peters JL, McCracken KG	2013	Stepwise colonization of the Andes by Ruddy Ducks and the evolution of novel β‐globin variants	https://www.ncbi.nlm.nih.gov/nuccore/	https://www.ncbi.nlm.nih.gov/nuccore/ AM084950	NCBI GenBank	AM084950
Wilson RE, Peters JL, McCracken KG	2013	Stepwise colonization of the Andes by Ruddy Ducks and the evolution of novel β‐globin variants	https://www.ncbi.nlm.nih.gov/nuccore/	https://www.ncbi.nlm.nih.gov/nuccore/ AM084951	NCBI GenBank	AM084951
Wilson RE, Peters JL, McCracken KG	2013	Stepwise colonization of the Andes by Ruddy Ducks and the evolution of novel β‐globin variants	https://www.ncbi.nlm.nih.gov/nuccore/	https://www.ncbi.nlm.nih.gov/nuccore/ AM084952	NCBI GenBank	AM084952
Wilson RE, Peters JL, McCracken KG	2013	Stepwise colonization of the Andes by Ruddy Ducks and the evolution of novel β‐globin variants	https://www.ncbi.nlm.nih.gov/nuccore/	https://www.ncbi.nlm.nih.gov/nuccore/ AM084953	NCBI GenBank	AM084953
Wilson RE, Peters JL, McCracken KG	2013	Stepwise colonization of the Andes by Ruddy Ducks and the evolution of novel β‐globin variants	https://www.ncbi.nlm.nih.gov/nuccore/	https://www.ncbi.nlm.nih.gov/nuccore/ AM084954	NCBI GenBank	AM084954
Wilson RE, Peters JL, McCracken KG	2013	Stepwise colonization of the Andes by Ruddy Ducks and the evolution of novel β‐globin variants	https://www.ncbi.nlm.nih.gov/nuccore/	https://www.ncbi.nlm.nih.gov/nuccore/ AM084955	NCBI GenBank	AM084955
Wilson RE, Peters JL, McCracken KG	2013	Stepwise colonization of the Andes by Ruddy Ducks and the evolution of novel β‐globin variants	https://www.ncbi.nlm.nih.gov/nuccore/	https://www.ncbi.nlm.nih.gov/nuccore/ AM084956	NCBI GenBank	AM084956
Wilson RE, Peters JL, McCracken KG	2013	Stepwise colonization of the Andes by Ruddy Ducks and the evolution of novel β‐globin variants	https://www.ncbi.nlm.nih.gov/nuccore/	https://www.ncbi.nlm.nih.gov/nuccore/ AM084957	NCBI GenBank	AM084957
Wilson RE, Peters JL, McCracken KG	2013	Stepwise colonization of the Andes by Ruddy Ducks and the evolution of novel β‐globin variants	https://www.ncbi.nlm.nih.gov/nuccore/	https://www.ncbi.nlm.nih.gov/nuccore/ AM084958	NCBI GenBank	AM084958
Wilson RE, Peters JL, McCracken KG	2013	Stepwise colonization of the Andes by Ruddy Ducks and the evolution of novel β‐globin variants	https://www.ncbi.nlm.nih.gov/nuccore/	https://www.ncbi.nlm.nih.gov/nuccore/ AM084959	NCBI GenBank	AM084959
Wilson RE, Peters JL, McCracken KG	2013	Stepwise colonization of the Andes by Ruddy Ducks and the evolution of novel β‐globin variants	https://www.ncbi.nlm.nih.gov/nuccore/	https://www.ncbi.nlm.nih.gov/nuccore/ AM084960	NCBI GenBank	AM084960
Wilson RE, Peters JL, McCracken KG	2013	Stepwise colonization of the Andes by Ruddy Ducks and the evolution of novel β‐globin variants	https://www.ncbi.nlm.nih.gov/nuccore/	https://www.ncbi.nlm.nih.gov/nuccore/ AM084961	NCBI GenBank	AM084961
Wilson RE, Peters JL, McCracken KG	2013	Stepwise colonization of the Andes by Ruddy Ducks and the evolution of novel β‐globin variants	https://www.ncbi.nlm.nih.gov/nuccore/	https://www.ncbi.nlm.nih.gov/nuccore/ AM084962	NCBI GenBank	AM084962
Wilson RE, Peters JL, McCracken KG	2013	Stepwise colonization of the Andes by Ruddy Ducks and the evolution of novel β‐globin variants	https://www.ncbi.nlm.nih.gov/nuccore/	https://www.ncbi.nlm.nih.gov/nuccore/ AM084963	NCBI GenBank	AM084963
Wilson RE, Peters JL, McCracken KG	2013	Stepwise colonization of the Andes by Ruddy Ducks and the evolution of novel β‐globin variants	https://www.ncbi.nlm.nih.gov/nuccore/	https://www.ncbi.nlm.nih.gov/nuccore/ AM084964	NCBI GenBank	AM084964
Wilson RE, Peters JL, McCracken KG	2013	Stepwise colonization of the Andes by Ruddy Ducks and the evolution of novel β‐globin variants	https://www.ncbi.nlm.nih.gov/nuccore/	https://www.ncbi.nlm.nih.gov/nuccore/ AM084965	NCBI GenBank	AM084965
Wilson RE, Peters JL, McCracken KG	2013	Stepwise colonization of the Andes by Ruddy Ducks and the evolution of novel β‐globin variants	https://www.ncbi.nlm.nih.gov/nuccore/	https://www.ncbi.nlm.nih.gov/nuccore/ AM084966	NCBI GenBank	AM084966
Wilson RE, Peters JL, McCracken KG	2013	Stepwise colonization of the Andes by Ruddy Ducks and the evolution of novel β‐globin variants	https://www.ncbi.nlm.nih.gov/nuccore/	https://www.ncbi.nlm.nih.gov/nuccore/ AM084967	NCBI GenBank	AM084967
Wilson RE, Peters JL, McCracken KG	2013	Stepwise colonization of the Andes by Ruddy Ducks and the evolution of novel β‐globin variants	https://www.ncbi.nlm.nih.gov/nuccore/	https://www.ncbi.nlm.nih.gov/nuccore/ AM084968	NCBI GenBank	AM084968
Wilson RE, Peters JL, McCracken KG	2013	Stepwise colonization of the Andes by Ruddy Ducks and the evolution of novel β‐globin variants	https://www.ncbi.nlm.nih.gov/nuccore/	https://www.ncbi.nlm.nih.gov/nuccore/ AM084969	NCBI GenBank	AM084969
Wilson RE, Peters JL, McCracken KG	2013	Stepwise colonization of the Andes by Ruddy Ducks and the evolution of novel β‐globin variants	https://www.ncbi.nlm.nih.gov/nuccore/	https://www.ncbi.nlm.nih.gov/nuccore/ AM084970	NCBI GenBank	AM084970
Wilson RE, Peters JL, McCracken KG	2013	Stepwise colonization of the Andes by Ruddy Ducks and the evolution of novel β‐globin variants	https://www.ncbi.nlm.nih.gov/nuccore/	https://www.ncbi.nlm.nih.gov/nuccore/ AM084971	NCBI GenBank	AM084971
Wilson RE, Peters JL, McCracken KG	2013	Stepwise colonization of the Andes by Ruddy Ducks and the evolution of novel β‐globin variants	https://www.ncbi.nlm.nih.gov/nuccore/	https://www.ncbi.nlm.nih.gov/nuccore/ AM084972	NCBI GenBank	AM084972
Wilson RE, Peters JL, McCracken KG	2013	Stepwise colonization of the Andes by Ruddy Ducks and the evolution of novel β‐globin variants	https://www.ncbi.nlm.nih.gov/nuccore/	https://www.ncbi.nlm.nih.gov/nuccore/ AM084973	NCBI GenBank	AM084973
Wilson RE, Peters JL, McCracken KG	2013	Stepwise colonization of the Andes by Ruddy Ducks and the evolution of novel β‐globin variants	https://www.ncbi.nlm.nih.gov/nuccore/	https://www.ncbi.nlm.nih.gov/nuccore/ AM084974	NCBI GenBank	AM084974
Wilson RE, Peters JL, McCracken KG	2013	Stepwise colonization of the Andes by Ruddy Ducks and the evolution of novel β‐globin variants	https://www.ncbi.nlm.nih.gov/nuccore/	https://www.ncbi.nlm.nih.gov/nuccore/ AM084975	NCBI GenBank	AM084975
Wilson RE, Peters JL, McCracken KG	2013	Stepwise colonization of the Andes by Ruddy Ducks and the evolution of novel β‐globin variants	https://www.ncbi.nlm.nih.gov/nuccore/	https://www.ncbi.nlm.nih.gov/nuccore/ AM084976	NCBI GenBank	AM084976
Wilson RE, Peters JL, McCracken KG	2013	Stepwise colonization of the Andes by Ruddy Ducks and the evolution of novel β‐globin variants	https://www.ncbi.nlm.nih.gov/nuccore/	https://www.ncbi.nlm.nih.gov/nuccore/ AM084977	NCBI GenBank	AM084977
Wilson RE, Peters JL, McCracken KG	2013	Stepwise colonization of the Andes by Ruddy Ducks and the evolution of novel β‐globin variants	https://www.ncbi.nlm.nih.gov/nuccore/	https://www.ncbi.nlm.nih.gov/nuccore/ AM084978	NCBI GenBank	AM084978
Wilson RE, Peters JL, McCracken KG	2013	Stepwise colonization of the Andes by Ruddy Ducks and the evolution of novel β‐globin variants	https://www.ncbi.nlm.nih.gov/nuccore/	https://www.ncbi.nlm.nih.gov/nuccore/ AM084979	NCBI GenBank	AM084979
Wilson RE, Peters JL, McCracken KG	2013	Stepwise colonization of the Andes by Ruddy Ducks and the evolution of novel β‐globin variants	https://www.ncbi.nlm.nih.gov/nuccore/	https://www.ncbi.nlm.nih.gov/nuccore/ AM084980	NCBI GenBank	AM084980
Wilson RE, Peters JL, McCracken KG	2013	Stepwise colonization of the Andes by Ruddy Ducks and the evolution of novel β‐globin variants	https://www.ncbi.nlm.nih.gov/nuccore/	https://www.ncbi.nlm.nih.gov/nuccore/ AM084981	NCBI GenBank	AM084981
Wilson RE, Peters JL, McCracken KG	2013	Stepwise colonization of the Andes by Ruddy Ducks and the evolution of novel β‐globin variants	https://www.ncbi.nlm.nih.gov/nuccore/	https://www.ncbi.nlm.nih.gov/nuccore/ AM084982	NCBI GenBank	AM084982
Wilson RE, Peters JL, McCracken KG	2013	Stepwise colonization of the Andes by Ruddy Ducks and the evolution of novel β‐globin variants	https://www.ncbi.nlm.nih.gov/nuccore/	https://www.ncbi.nlm.nih.gov/nuccore/ AM084983	NCBI GenBank	AM084983
Wilson RE, Peters JL, McCracken KG	2013	Stepwise colonization of the Andes by Ruddy Ducks and the evolution of novel β‐globin variants	https://www.ncbi.nlm.nih.gov/nuccore/	https://www.ncbi.nlm.nih.gov/nuccore/ AM084984	NCBI GenBank	AM084984
Wilson RE, Peters JL, McCracken KG	2013	Stepwise colonization of the Andes by Ruddy Ducks and the evolution of novel β‐globin variants	https://www.ncbi.nlm.nih.gov/nuccore/	https://www.ncbi.nlm.nih.gov/nuccore/ AM084985	NCBI GenBank	AM084985
Wilson RE, Peters JL, McCracken KG	2013	Stepwise colonization of the Andes by Ruddy Ducks and the evolution of novel β‐globin variants	https://www.ncbi.nlm.nih.gov/nuccore/	https://www.ncbi.nlm.nih.gov/nuccore/ AM084986	NCBI GenBank	AM084986
Wilson RE, Peters JL, McCracken KG	2013	Stepwise colonization of the Andes by Ruddy Ducks and the evolution of novel β‐globin variants	https://www.ncbi.nlm.nih.gov/nuccore/	https://www.ncbi.nlm.nih.gov/nuccore/ AM084987	NCBI GenBank	AM084987
Wilson RE, Peters JL, McCracken KG	2013	Stepwise colonization of the Andes by Ruddy Ducks and the evolution of novel β‐globin variants	https://www.ncbi.nlm.nih.gov/nuccore/	https://www.ncbi.nlm.nih.gov/nuccore/ AM084988	NCBI GenBank	AM084988
Wilson RE, Peters JL, McCracken KG	2013	Stepwise colonization of the Andes by Ruddy Ducks and the evolution of novel β‐globin variants	https://www.ncbi.nlm.nih.gov/nuccore/	https://www.ncbi.nlm.nih.gov/nuccore/ AM084989	NCBI GenBank	AM084989
Wilson RE, Peters JL, McCracken KG	2013	Stepwise colonization of the Andes by Ruddy Ducks and the evolution of novel β‐globin variants	https://www.ncbi.nlm.nih.gov/nuccore/	https://www.ncbi.nlm.nih.gov/nuccore/ AM084990	NCBI GenBank	AM084990
Wilson RE, Peters JL, McCracken KG	2013	Stepwise colonization of the Andes by Ruddy Ducks and the evolution of novel β‐globin variants	https://www.ncbi.nlm.nih.gov/nuccore/	https://www.ncbi.nlm.nih.gov/nuccore/ AM084991	NCBI GenBank	AM084991
Wilson RE, Peters JL, McCracken KG	2013	Stepwise colonization of the Andes by Ruddy Ducks and the evolution of novel β‐globin variants	https://www.ncbi.nlm.nih.gov/nuccore/	https://www.ncbi.nlm.nih.gov/nuccore/ AM084992	NCBI GenBank	AM084992
Wilson RE, Peters JL, McCracken KG	2013	Stepwise colonization of the Andes by Ruddy Ducks and the evolution of novel β‐globin variants	https://www.ncbi.nlm.nih.gov/nuccore/	https://www.ncbi.nlm.nih.gov/nuccore/ AM084993	NCBI GenBank	AM084993
Wilson RE, Peters JL, McCracken KG	2013	Stepwise colonization of the Andes by Ruddy Ducks and the evolution of novel β‐globin variants	https://www.ncbi.nlm.nih.gov/nuccore/	https://www.ncbi.nlm.nih.gov/nuccore/ AM084994	NCBI GenBank	AM084994
Wilson RE, Peters JL, McCracken KG	2013	Stepwise colonization of the Andes by Ruddy Ducks and the evolution of novel β‐globin variants	https://www.ncbi.nlm.nih.gov/nuccore/	https://www.ncbi.nlm.nih.gov/nuccore/ AM084995	NCBI GenBank	AM084995
Wilson RE, Peters JL, McCracken KG	2013	Stepwise colonization of the Andes by Ruddy Ducks and the evolution of novel β‐globin variants	https://www.ncbi.nlm.nih.gov/nuccore/	https://www.ncbi.nlm.nih.gov/nuccore/ AM084996	NCBI GenBank	AM084996
Wilson RE, Peters JL, McCracken KG	2013	Stepwise colonization of the Andes by Ruddy Ducks and the evolution of novel β‐globin variants	https://www.ncbi.nlm.nih.gov/nuccore/	https://www.ncbi.nlm.nih.gov/nuccore/ AM084997	NCBI GenBank	AM084997
Wilson RE, Peters JL, McCracken KG	2013	Stepwise colonization of the Andes by Ruddy Ducks and the evolution of novel β‐globin variants	https://www.ncbi.nlm.nih.gov/nuccore/	https://www.ncbi.nlm.nih.gov/nuccore/ JX910949	NCBI GenBank	JX910949
Wilson RE, Peters JL, McCracken KG	2013	Stepwise colonization of the Andes by Ruddy Ducks and the evolution of novel β‐globin variants	https://www.ncbi.nlm.nih.gov/nuccore/	https://www.ncbi.nlm.nih.gov/nuccore/ JX910950	NCBI GenBank	JX910950
Wilson RE, Peters JL, McCracken KG	2013	Stepwise colonization of the Andes by Ruddy Ducks and the evolution of novel β‐globin variants	https://www.ncbi.nlm.nih.gov/nuccore/	https://www.ncbi.nlm.nih.gov/nuccore/ JX910951	NCBI GenBank	JX910951
Wilson RE, Peters JL, McCracken KG	2013	Stepwise colonization of the Andes by Ruddy Ducks and the evolution of novel β‐globin variants	https://www.ncbi.nlm.nih.gov/nuccore/	https://www.ncbi.nlm.nih.gov/nuccore/ JX910952	NCBI GenBank	JX910952
Wilson RE, Peters JL, McCracken KG	2013	Stepwise colonization of the Andes by Ruddy Ducks and the evolution of novel β‐globin variants	https://www.ncbi.nlm.nih.gov/nuccore/	https://www.ncbi.nlm.nih.gov/nuccore/ JX910953	NCBI GenBank	JX910953
Wilson RE, Peters JL, McCracken KG	2013	Stepwise colonization of the Andes by Ruddy Ducks and the evolution of novel β‐globin variants	https://www.ncbi.nlm.nih.gov/nuccore/	https://www.ncbi.nlm.nih.gov/nuccore/ JX910954	NCBI GenBank	JX910954
Wilson RE, Peters JL, McCracken KG	2013	Stepwise colonization of the Andes by Ruddy Ducks and the evolution of novel β‐globin variants	https://www.ncbi.nlm.nih.gov/nuccore/	https://www.ncbi.nlm.nih.gov/nuccore/ JX910955	NCBI GenBank	JX910955
Wilson RE, Peters JL, McCracken KG	2013	Stepwise colonization of the Andes by Ruddy Ducks and the evolution of novel β‐globin variants	https://www.ncbi.nlm.nih.gov/nuccore/	https://www.ncbi.nlm.nih.gov/nuccore/ JX910956	NCBI GenBank	JX910956
Wilson RE, Peters JL, McCracken KG	2013	Stepwise colonization of the Andes by Ruddy Ducks and the evolution of novel β‐globin variants	https://www.ncbi.nlm.nih.gov/nuccore/	https://www.ncbi.nlm.nih.gov/nuccore/ JX910957	NCBI GenBank	JX910957
Wilson RE, Peters JL, McCracken KG	2013	Stepwise colonization of the Andes by Ruddy Ducks and the evolution of novel β‐globin variants	https://www.ncbi.nlm.nih.gov/nuccore/	https://www.ncbi.nlm.nih.gov/nuccore/ JX910958	NCBI GenBank	JX910958
Wilson RE, Peters JL, McCracken KG	2013	Stepwise colonization of the Andes by Ruddy Ducks and the evolution of novel β‐globin variants	https://www.ncbi.nlm.nih.gov/nuccore/	https://www.ncbi.nlm.nih.gov/nuccore/ JX910959	NCBI GenBank	JX910959
Wilson RE, Peters JL, McCracken KG	2013	Stepwise colonization of the Andes by Ruddy Ducks and the evolution of novel β‐globin variants	https://www.ncbi.nlm.nih.gov/nuccore/	https://www.ncbi.nlm.nih.gov/nuccore/ JX910960	NCBI GenBank	JX910960
Wilson RE, Peters JL, McCracken KG	2013	Stepwise colonization of the Andes by Ruddy Ducks and the evolution of novel β‐globin variants	https://www.ncbi.nlm.nih.gov/nuccore/	https://www.ncbi.nlm.nih.gov/nuccore/ JX910961	NCBI GenBank	JX910961
Wilson RE, Peters JL, McCracken KG	2013	Stepwise colonization of the Andes by Ruddy Ducks and the evolution of novel β‐globin variants	https://www.ncbi.nlm.nih.gov/nuccore/	https://www.ncbi.nlm.nih.gov/nuccore/ JX910962	NCBI GenBank	JX910962
Wilson RE, Peters JL, McCracken KG	2013	Stepwise colonization of the Andes by Ruddy Ducks and the evolution of novel β‐globin variants	https://www.ncbi.nlm.nih.gov/nuccore/	https://www.ncbi.nlm.nih.gov/nuccore/ JX910963	NCBI GenBank	JX910963
Wilson RE, Peters JL, McCracken KG	2013	Stepwise colonization of the Andes by Ruddy Ducks and the evolution of novel β‐globin variants	https://www.ncbi.nlm.nih.gov/nuccore/	https://www.ncbi.nlm.nih.gov/nuccore/ JX910964	NCBI GenBank	JX910964
Wilson RE, Peters JL, McCracken KG	2013	Stepwise colonization of the Andes by Ruddy Ducks and the evolution of novel β‐globin variants	https://www.ncbi.nlm.nih.gov/nuccore/	https://www.ncbi.nlm.nih.gov/nuccore/ JX910965	NCBI GenBank	JX910965
Wilson RE, Peters JL, McCracken KG	2013	Stepwise colonization of the Andes by Ruddy Ducks and the evolution of novel β‐globin variants	https://www.ncbi.nlm.nih.gov/nuccore/	https://www.ncbi.nlm.nih.gov/nuccore/ JX910966	NCBI GenBank	JX910966
Wilson RE, Peters JL, McCracken KG	2013	Stepwise colonization of the Andes by Ruddy Ducks and the evolution of novel β‐globin variants	https://www.ncbi.nlm.nih.gov/nuccore/	https://www.ncbi.nlm.nih.gov/nuccore/ JX910967	NCBI GenBank	JX910967
Wilson RE, Peters JL, McCracken KG	2013	Stepwise colonization of the Andes by Ruddy Ducks and the evolution of novel β‐globin variants	https://www.ncbi.nlm.nih.gov/nuccore/	https://www.ncbi.nlm.nih.gov/nuccore/ JX910968	NCBI GenBank	JX910968
Wilson RE, Peters JL, McCracken KG	2013	Stepwise colonization of the Andes by Ruddy Ducks and the evolution of novel β‐globin variants	https://www.ncbi.nlm.nih.gov/nuccore/	https://www.ncbi.nlm.nih.gov/nuccore/ JX910969	NCBI GenBank	JX910969
Wilson RE, Peters JL, McCracken KG	2013	Stepwise colonization of the Andes by Ruddy Ducks and the evolution of novel β‐globin variants	https://www.ncbi.nlm.nih.gov/nuccore/	https://www.ncbi.nlm.nih.gov/nuccore/ JX910970	NCBI GenBank	JX910970
Wilson RE, Peters JL, McCracken KG	2013	Stepwise colonization of the Andes by Ruddy Ducks and the evolution of novel β‐globin variants	https://www.ncbi.nlm.nih.gov/nuccore/	https://www.ncbi.nlm.nih.gov/nuccore/ JX910971	NCBI GenBank	JX910971
Bulgarella M, Peters JL, Kopuchian C, Valqui TH, Wilson RE, McCracken KG	2012	Multilocus coalescent analysis of haemoglobin differentiation between low‐and high‐altitude populations of crested ducks (Lophonetta specularioides)	https://www.ncbi.nlm.nih.gov/nuccore/	https://www.ncbi.nlm.nih.gov/nuccore/ HM063481	NCBI GenBank	HM063481
Bulgarella M, Peters JL, Kopuchian C, Valqui TH, Wilson RE, McCracken KG	2012	Multilocus coalescent analysis of haemoglobin differentiation between low‐and high‐altitude populations of crested ducks (Lophonetta specularioides)	https://www.ncbi.nlm.nih.gov/nuccore/	https://www.ncbi.nlm.nih.gov/nuccore/ HM063482	NCBI GenBank	HM063482
Bulgarella M, Peters JL, Kopuchian C, Valqui TH, Wilson RE, McCracken KG	2012	Multilocus coalescent analysis of haemoglobin differentiation between low‐and high‐altitude populations of crested ducks (Lophonetta specularioides)	https://www.ncbi.nlm.nih.gov/nuccore/	https://www.ncbi.nlm.nih.gov/nuccore/ HM063483	NCBI GenBank	HM063483
Bulgarella M, Peters JL, Kopuchian C, Valqui TH, Wilson RE, McCracken KG	2012	Multilocus coalescent analysis of haemoglobin differentiation between low‐and high‐altitude populations of crested ducks (Lophonetta specularioides)	https://www.ncbi.nlm.nih.gov/nuccore/	https://www.ncbi.nlm.nih.gov/nuccore/ HM063484	NCBI GenBank	HM063484
Bulgarella M, Peters JL, Kopuchian C, Valqui TH, Wilson RE, McCracken KG	2012	Multilocus coalescent analysis of haemoglobin differentiation between low‐and high‐altitude populations of crested ducks (Lophonetta specularioides)	https://www.ncbi.nlm.nih.gov/nuccore/	https://www.ncbi.nlm.nih.gov/nuccore/ HM063485	NCBI GenBank	HM063485
Bulgarella M, Peters JL, Kopuchian C, Valqui TH, Wilson RE, McCracken KG	2012	Multilocus coalescent analysis of haemoglobin differentiation between low‐and high‐altitude populations of crested ducks (Lophonetta specularioides)	https://www.ncbi.nlm.nih.gov/nuccore/	https://www.ncbi.nlm.nih.gov/nuccore/ HM063486	NCBI GenBank	HM063486
Bulgarella M, Peters JL, Kopuchian C, Valqui TH, Wilson RE, McCracken KG	2012	Multilocus coalescent analysis of haemoglobin differentiation between low‐and high‐altitude populations of crested ducks (Lophonetta specularioides)	https://www.ncbi.nlm.nih.gov/nuccore/	https://www.ncbi.nlm.nih.gov/nuccore/ HM063487	NCBI GenBank	HM063487
Bulgarella M, Peters JL, Kopuchian C, Valqui TH, Wilson RE, McCracken KG	2012	Multilocus coalescent analysis of haemoglobin differentiation between low‐and high‐altitude populations of crested ducks (Lophonetta specularioides)	https://www.ncbi.nlm.nih.gov/nuccore/	https://www.ncbi.nlm.nih.gov/nuccore/ HM063488	NCBI GenBank	HM063488
Bulgarella M, Peters JL, Kopuchian C, Valqui TH, Wilson RE, McCracken KG	2012	Multilocus coalescent analysis of haemoglobin differentiation between low‐and high‐altitude populations of crested ducks (Lophonetta specularioides)	https://www.ncbi.nlm.nih.gov/nuccore/	https://www.ncbi.nlm.nih.gov/nuccore/ HM063489	NCBI GenBank	HM063489
Bulgarella M, Peters JL, Kopuchian C, Valqui TH, Wilson RE, McCracken KG	2012	Multilocus coalescent analysis of haemoglobin differentiation between low‐and high‐altitude populations of crested ducks (Lophonetta specularioides)	https://www.ncbi.nlm.nih.gov/nuccore/	https://www.ncbi.nlm.nih.gov/nuccore/ HM063490	NCBI GenBank	HM063490
Bulgarella M, Peters JL, Kopuchian C, Valqui TH, Wilson RE, McCracken KG	2012	Multilocus coalescent analysis of haemoglobin differentiation between low‐and high‐altitude populations of crested ducks (Lophonetta specularioides)	https://www.ncbi.nlm.nih.gov/nuccore/	https://www.ncbi.nlm.nih.gov/nuccore/ HM063491	NCBI GenBank	HM063491
Bulgarella M, Peters JL, Kopuchian C, Valqui TH, Wilson RE, McCracken KG	2012	Multilocus coalescent analysis of haemoglobin differentiation between low‐and high‐altitude populations of crested ducks (Lophonetta specularioides)	https://www.ncbi.nlm.nih.gov/nuccore/	https://www.ncbi.nlm.nih.gov/nuccore/ HM063492	NCBI GenBank	HM063492
Bulgarella M, Peters JL, Kopuchian C, Valqui TH, Wilson RE, McCracken KG	2012	Multilocus coalescent analysis of haemoglobin differentiation between low‐and high‐altitude populations of crested ducks (Lophonetta specularioides)	https://www.ncbi.nlm.nih.gov/nuccore/	https://www.ncbi.nlm.nih.gov/nuccore/ HM063493	NCBI GenBank	HM063493
Bulgarella M, Peters JL, Kopuchian C, Valqui TH, Wilson RE, McCracken KG	2012	Multilocus coalescent analysis of haemoglobin differentiation between low‐and high‐altitude populations of crested ducks (Lophonetta specularioides)	https://www.ncbi.nlm.nih.gov/nuccore/	https://www.ncbi.nlm.nih.gov/nuccore/ HM063494	NCBI GenBank	HM063494
Bulgarella M, Peters JL, Kopuchian C, Valqui TH, Wilson RE, McCracken KG	2012	Multilocus coalescent analysis of haemoglobin differentiation between low‐and high‐altitude populations of crested ducks (Lophonetta specularioides)	https://www.ncbi.nlm.nih.gov/nuccore/	https://www.ncbi.nlm.nih.gov/nuccore/ HM063495	NCBI GenBank	HM063495
Bulgarella M, Peters JL, Kopuchian C, Valqui TH, Wilson RE, McCracken KG	2012	Multilocus coalescent analysis of haemoglobin differentiation between low‐and high‐altitude populations of crested ducks (Lophonetta specularioides)	https://www.ncbi.nlm.nih.gov/nuccore/	https://www.ncbi.nlm.nih.gov/nuccore/ HM063496	NCBI GenBank	HM063496
Bulgarella M, Peters JL, Kopuchian C, Valqui TH, Wilson RE, McCracken KG	2012	Multilocus coalescent analysis of haemoglobin differentiation between low‐and high‐altitude populations of crested ducks (Lophonetta specularioides)	https://www.ncbi.nlm.nih.gov/nuccore/	https://www.ncbi.nlm.nih.gov/nuccore/ HM063497	NCBI GenBank	HM063497
Bulgarella M, Peters JL, Kopuchian C, Valqui TH, Wilson RE, McCracken KG	2012	Multilocus coalescent analysis of haemoglobin differentiation between low‐and high‐altitude populations of crested ducks (Lophonetta specularioides)	https://www.ncbi.nlm.nih.gov/nuccore/	https://www.ncbi.nlm.nih.gov/nuccore/ HM063498	NCBI GenBank	HM063498
Bulgarella M, Peters JL, Kopuchian C, Valqui TH, Wilson RE, McCracken KG	2012	Multilocus coalescent analysis of haemoglobin differentiation between low‐and high‐altitude populations of crested ducks (Lophonetta specularioides)	https://www.ncbi.nlm.nih.gov/nuccore/	https://www.ncbi.nlm.nih.gov/nuccore/ HM063499	NCBI GenBank	HM063499
Bulgarella M, Peters JL, Kopuchian C, Valqui TH, Wilson RE, McCracken KG	2012	Multilocus coalescent analysis of haemoglobin differentiation between low‐and high‐altitude populations of crested ducks (Lophonetta specularioides)	https://www.ncbi.nlm.nih.gov/nuccore/	https://www.ncbi.nlm.nih.gov/nuccore/ HM063500	NCBI GenBank	HM063500
Bulgarella M, Peters JL, Kopuchian C, Valqui TH, Wilson RE, McCracken KG	2012	Multilocus coalescent analysis of haemoglobin differentiation between low‐and high‐altitude populations of crested ducks (Lophonetta specularioides)	https://www.ncbi.nlm.nih.gov/nuccore/	https://www.ncbi.nlm.nih.gov/nuccore/ HM063501	NCBI GenBank	HM063501
Bulgarella M, Peters JL, Kopuchian C, Valqui TH, Wilson RE, McCracken KG	2012	Multilocus coalescent analysis of haemoglobin differentiation between low‐and high‐altitude populations of crested ducks (Lophonetta specularioides)	https://www.ncbi.nlm.nih.gov/nuccore/	https://www.ncbi.nlm.nih.gov/nuccore/ HM063502	NCBI GenBank	HM063502
Bulgarella M, Peters JL, Kopuchian C, Valqui TH, Wilson RE, McCracken KG	2012	Multilocus coalescent analysis of haemoglobin differentiation between low‐and high‐altitude populations of crested ducks (Lophonetta specularioides)	https://www.ncbi.nlm.nih.gov/nuccore/	https://www.ncbi.nlm.nih.gov/nuccore/ HM063503	NCBI GenBank	HM063503
Bulgarella M, Peters JL, Kopuchian C, Valqui TH, Wilson RE, McCracken KG	2012	Multilocus coalescent analysis of haemoglobin differentiation between low‐and high‐altitude populations of crested ducks (Lophonetta specularioides)	https://www.ncbi.nlm.nih.gov/nuccore/	https://www.ncbi.nlm.nih.gov/nuccore/ JN833791	NCBI GenBank	JN833791
Bulgarella M, Peters JL, Kopuchian C, Valqui TH, Wilson RE, McCracken KG	2012	Multilocus coalescent analysis of haemoglobin differentiation between low‐and high‐altitude populations of crested ducks (Lophonetta specularioides)	https://www.ncbi.nlm.nih.gov/nuccore/	https://www.ncbi.nlm.nih.gov/nuccore/ JN833792	NCBI GenBank	JN833792
Bulgarella M, Peters JL, Kopuchian C, Valqui TH, Wilson RE, McCracken KG	2012	Multilocus coalescent analysis of haemoglobin differentiation between low‐and high‐altitude populations of crested ducks (Lophonetta specularioides)	https://www.ncbi.nlm.nih.gov/nuccore/	https://www.ncbi.nlm.nih.gov/nuccore/ JN833793	NCBI GenBank	JN833793
Bulgarella M, Peters JL, Kopuchian C, Valqui TH, Wilson RE, McCracken KG	2012	Multilocus coalescent analysis of haemoglobin differentiation between low‐and high‐altitude populations of crested ducks (Lophonetta specularioides)	https://www.ncbi.nlm.nih.gov/nuccore/	https://www.ncbi.nlm.nih.gov/nuccore/ JN833794	NCBI GenBank	JN833794
Bulgarella M, Peters JL, Kopuchian C, Valqui TH, Wilson RE, McCracken KG	2012	Multilocus coalescent analysis of haemoglobin differentiation between low‐and high‐altitude populations of crested ducks (Lophonetta specularioides)	https://www.ncbi.nlm.nih.gov/nuccore/	https://www.ncbi.nlm.nih.gov/nuccore/ JN833795	NCBI GenBank	JN833795
Bulgarella M, Peters JL, Kopuchian C, Valqui TH, Wilson RE, McCracken KG	2012	Multilocus coalescent analysis of haemoglobin differentiation between low‐and high‐altitude populations of crested ducks (Lophonetta specularioides)	https://www.ncbi.nlm.nih.gov/nuccore/	https://www.ncbi.nlm.nih.gov/nuccore/ JN833796	NCBI GenBank	JN833796
Bulgarella M, Peters JL, Kopuchian C, Valqui TH, Wilson RE, McCracken KG	2012	Multilocus coalescent analysis of haemoglobin differentiation between low‐and high‐altitude populations of crested ducks (Lophonetta specularioides)	https://www.ncbi.nlm.nih.gov/nuccore/	https://www.ncbi.nlm.nih.gov/nuccore/ JN833797	NCBI GenBank	JN833797
Bulgarella M, Peters JL, Kopuchian C, Valqui TH, Wilson RE, McCracken KG	2012	Multilocus coalescent analysis of haemoglobin differentiation between low‐and high‐altitude populations of crested ducks (Lophonetta specularioides)	https://www.ncbi.nlm.nih.gov/nuccore/	https://www.ncbi.nlm.nih.gov/nuccore/ JN833798	NCBI GenBank	JN833798
Bulgarella M, Peters JL, Kopuchian C, Valqui TH, Wilson RE, McCracken KG	2012	Multilocus coalescent analysis of haemoglobin differentiation between low‐and high‐altitude populations of crested ducks (Lophonetta specularioides)	https://www.ncbi.nlm.nih.gov/nuccore/	https://www.ncbi.nlm.nih.gov/nuccore/ JN833799	NCBI GenBank	JN833799
Bulgarella M, Peters JL, Kopuchian C, Valqui TH, Wilson RE, McCracken KG	2012	Multilocus coalescent analysis of haemoglobin differentiation between low‐and high‐altitude populations of crested ducks (Lophonetta specularioides)	https://www.ncbi.nlm.nih.gov/nuccore/	https://www.ncbi.nlm.nih.gov/nuccore/ JN833800	NCBI GenBank	JN833800
Bulgarella M, Peters JL, Kopuchian C, Valqui TH, Wilson RE, McCracken KG	2012	Multilocus coalescent analysis of haemoglobin differentiation between low‐and high‐altitude populations of crested ducks (Lophonetta specularioides)	https://www.ncbi.nlm.nih.gov/nuccore/	https://www.ncbi.nlm.nih.gov/nuccore/ JN833801	NCBI GenBank	JN833801
Bulgarella M, Peters JL, Kopuchian C, Valqui TH, Wilson RE, McCracken KG	2012	Multilocus coalescent analysis of haemoglobin differentiation between low‐and high‐altitude populations of crested ducks (Lophonetta specularioides)	https://www.ncbi.nlm.nih.gov/nuccore/	https://www.ncbi.nlm.nih.gov/nuccore/ JN833802	NCBI GenBank	JN833802
Bulgarella M, Peters JL, Kopuchian C, Valqui TH, Wilson RE, McCracken KG	2012	Multilocus coalescent analysis of haemoglobin differentiation between low‐and high‐altitude populations of crested ducks (Lophonetta specularioides)	https://www.ncbi.nlm.nih.gov/nuccore/	https://www.ncbi.nlm.nih.gov/nuccore/ JN833803	NCBI GenBank	JN833803
Bulgarella M, Peters JL, Kopuchian C, Valqui TH, Wilson RE, McCracken KG	2012	Multilocus coalescent analysis of haemoglobin differentiation between low‐and high‐altitude populations of crested ducks (Lophonetta specularioides)	https://www.ncbi.nlm.nih.gov/nuccore/	https://www.ncbi.nlm.nih.gov/nuccore/ JN833804	NCBI GenBank	JN833804
Bulgarella M, Peters JL, Kopuchian C, Valqui TH, Wilson RE, McCracken KG	2012	Multilocus coalescent analysis of haemoglobin differentiation between low‐and high‐altitude populations of crested ducks (Lophonetta specularioides)	https://www.ncbi.nlm.nih.gov/nuccore/	https://www.ncbi.nlm.nih.gov/nuccore/ JN833805	NCBI GenBank	JN833805
Bulgarella M, Peters JL, Kopuchian C, Valqui TH, Wilson RE, McCracken KG	2012	Multilocus coalescent analysis of haemoglobin differentiation between low‐and high‐altitude populations of crested ducks (Lophonetta specularioides)	https://www.ncbi.nlm.nih.gov/nuccore/	https://www.ncbi.nlm.nih.gov/nuccore/ JN833806	NCBI GenBank	JN833806
Bulgarella M, Peters JL, Kopuchian C, Valqui TH, Wilson RE, McCracken KG	2012	Multilocus coalescent analysis of haemoglobin differentiation between low‐and high‐altitude populations of crested ducks (Lophonetta specularioides)	https://www.ncbi.nlm.nih.gov/nuccore/	https://www.ncbi.nlm.nih.gov/nuccore/ JN833807	NCBI GenBank	JN833807
Bulgarella M, Peters JL, Kopuchian C, Valqui TH, Wilson RE, McCracken KG	2012	Multilocus coalescent analysis of haemoglobin differentiation between low‐and high‐altitude populations of crested ducks (Lophonetta specularioides)	https://www.ncbi.nlm.nih.gov/nuccore/	https://www.ncbi.nlm.nih.gov/nuccore/ JN833808	NCBI GenBank	JN833808
Bulgarella M, Peters JL, Kopuchian C, Valqui TH, Wilson RE, McCracken KG	2012	Multilocus coalescent analysis of haemoglobin differentiation between low‐and high‐altitude populations of crested ducks (Lophonetta specularioides)	https://www.ncbi.nlm.nih.gov/nuccore/	https://www.ncbi.nlm.nih.gov/nuccore/ JN833809	NCBI GenBank	JN833809
Bulgarella M, Peters JL, Kopuchian C, Valqui TH, Wilson RE, McCracken KG	2012	Multilocus coalescent analysis of haemoglobin differentiation between low‐and high‐altitude populations of crested ducks (Lophonetta specularioides)	https://www.ncbi.nlm.nih.gov/nuccore/	https://www.ncbi.nlm.nih.gov/nuccore/ JN833810	NCBI GenBank	JN833810
Bulgarella M, Peters JL, Kopuchian C, Valqui TH, Wilson RE, McCracken KG	2012	Multilocus coalescent analysis of haemoglobin differentiation between low‐and high‐altitude populations of crested ducks (Lophonetta specularioides)	https://www.ncbi.nlm.nih.gov/nuccore/	https://www.ncbi.nlm.nih.gov/nuccore/ JN833811	NCBI GenBank	JN833811
Bulgarella M, Peters JL, Kopuchian C, Valqui TH, Wilson RE, McCracken KG	2012	Multilocus coalescent analysis of haemoglobin differentiation between low‐and high‐altitude populations of crested ducks (Lophonetta specularioides)	https://www.ncbi.nlm.nih.gov/nuccore/	https://www.ncbi.nlm.nih.gov/nuccore/ JN833812	NCBI GenBank	JN833812
Bulgarella M, Peters JL, Kopuchian C, Valqui TH, Wilson RE, McCracken KG	2012	Multilocus coalescent analysis of haemoglobin differentiation between low‐and high‐altitude populations of crested ducks (Lophonetta specularioides)	https://www.ncbi.nlm.nih.gov/nuccore/	https://www.ncbi.nlm.nih.gov/nuccore/ JN833813	NCBI GenBank	JN833813
Bulgarella M, Peters JL, Kopuchian C, Valqui TH, Wilson RE, McCracken KG	2012	Multilocus coalescent analysis of haemoglobin differentiation between low‐and high‐altitude populations of crested ducks (Lophonetta specularioides)	https://www.ncbi.nlm.nih.gov/nuccore/	https://www.ncbi.nlm.nih.gov/nuccore/ JN833814	NCBI GenBank	JN833814
Bulgarella M, Peters JL, Kopuchian C, Valqui TH, Wilson RE, McCracken KG	2012	Multilocus coalescent analysis of haemoglobin differentiation between low‐and high‐altitude populations of crested ducks (Lophonetta specularioides)	https://www.ncbi.nlm.nih.gov/nuccore/	https://www.ncbi.nlm.nih.gov/nuccore/ JN833815	NCBI GenBank	JN833815
Bulgarella M, Peters JL, Kopuchian C, Valqui TH, Wilson RE, McCracken KG	2012	Multilocus coalescent analysis of haemoglobin differentiation between low‐and high‐altitude populations of crested ducks (Lophonetta specularioides)	https://www.ncbi.nlm.nih.gov/nuccore/	https://www.ncbi.nlm.nih.gov/nuccore/ JN833816	NCBI GenBank	JN833816
Bulgarella M, Peters JL, Kopuchian C, Valqui TH, Wilson RE, McCracken KG	2012	Multilocus coalescent analysis of haemoglobin differentiation between low‐and high‐altitude populations of crested ducks (Lophonetta specularioides)	https://www.ncbi.nlm.nih.gov/nuccore/	https://www.ncbi.nlm.nih.gov/nuccore/ JN833817	NCBI GenBank	JN833817
Bulgarella M, Peters JL, Kopuchian C, Valqui TH, Wilson RE, McCracken KG	2012	Multilocus coalescent analysis of haemoglobin differentiation between low‐and high‐altitude populations of crested ducks (Lophonetta specularioides)	https://www.ncbi.nlm.nih.gov/nuccore/	https://www.ncbi.nlm.nih.gov/nuccore/ JN833818	NCBI GenBank	JN833818
Bulgarella M, Peters JL, Kopuchian C, Valqui TH, Wilson RE, McCracken KG	2012	Multilocus coalescent analysis of haemoglobin differentiation between low‐and high‐altitude populations of crested ducks (Lophonetta specularioides)	https://www.ncbi.nlm.nih.gov/nuccore/	https://www.ncbi.nlm.nih.gov/nuccore/ JN833819	NCBI GenBank	JN833819
Bulgarella M, Peters JL, Kopuchian C, Valqui TH, Wilson RE, McCracken KG	2012	Multilocus coalescent analysis of haemoglobin differentiation between low‐and high‐altitude populations of crested ducks (Lophonetta specularioides)	https://www.ncbi.nlm.nih.gov/nuccore/	https://www.ncbi.nlm.nih.gov/nuccore/ JN833820	NCBI GenBank	JN833820
Bulgarella M, Peters JL, Kopuchian C, Valqui TH, Wilson RE, McCracken KG	2012	Multilocus coalescent analysis of haemoglobin differentiation between low‐and high‐altitude populations of crested ducks (Lophonetta specularioides)	https://www.ncbi.nlm.nih.gov/nuccore/	https://www.ncbi.nlm.nih.gov/nuccore/ JN833821	NCBI GenBank	JN833821
Bulgarella M, Peters JL, Kopuchian C, Valqui TH, Wilson RE, McCracken KG	2012	Multilocus coalescent analysis of haemoglobin differentiation between low‐and high‐altitude populations of crested ducks (Lophonetta specularioides)	https://www.ncbi.nlm.nih.gov/nuccore/	https://www.ncbi.nlm.nih.gov/nuccore/ JN833822	NCBI GenBank	JN833822
Bulgarella M, Peters JL, Kopuchian C, Valqui TH, Wilson RE, McCracken KG	2012	Multilocus coalescent analysis of haemoglobin differentiation between low‐and high‐altitude populations of crested ducks (Lophonetta specularioides)	https://www.ncbi.nlm.nih.gov/nuccore/	https://www.ncbi.nlm.nih.gov/nuccore/ JN833823	NCBI GenBank	JN833823
Bulgarella M, Peters JL, Kopuchian C, Valqui TH, Wilson RE, McCracken KG	2012	Multilocus coalescent analysis of haemoglobin differentiation between low‐and high‐altitude populations of crested ducks (Lophonetta specularioides)	https://www.ncbi.nlm.nih.gov/nuccore/	https://www.ncbi.nlm.nih.gov/nuccore/ JN833824	NCBI GenBank	JN833824
Bulgarella M, Peters JL, Kopuchian C, Valqui TH, Wilson RE, McCracken KG	2012	Multilocus coalescent analysis of haemoglobin differentiation between low‐and high‐altitude populations of crested ducks (Lophonetta specularioides)	https://www.ncbi.nlm.nih.gov/nuccore/	https://www.ncbi.nlm.nih.gov/nuccore/ JN833825	NCBI GenBank	JN833825
Bulgarella M, Peters JL, Kopuchian C, Valqui TH, Wilson RE, McCracken KG	2012	Multilocus coalescent analysis of haemoglobin differentiation between low‐and high‐altitude populations of crested ducks (Lophonetta specularioides)	https://www.ncbi.nlm.nih.gov/nuccore/	https://www.ncbi.nlm.nih.gov/nuccore/ JN833826	NCBI GenBank	JN833826
Bulgarella M, Peters JL, Kopuchian C, Valqui TH, Wilson RE, McCracken KG	2012	Multilocus coalescent analysis of haemoglobin differentiation between low‐and high‐altitude populations of crested ducks (Lophonetta specularioides)	https://www.ncbi.nlm.nih.gov/nuccore/	https://www.ncbi.nlm.nih.gov/nuccore/ JN833827	NCBI GenBank	JN833827
Bulgarella M, Peters JL, Kopuchian C, Valqui TH, Wilson RE, McCracken KG	2012	Multilocus coalescent analysis of haemoglobin differentiation between low‐and high‐altitude populations of crested ducks (Lophonetta specularioides)	https://www.ncbi.nlm.nih.gov/nuccore/	https://www.ncbi.nlm.nih.gov/nuccore/ JN833828	NCBI GenBank	JN833828
Bulgarella M, Peters JL, Kopuchian C, Valqui TH, Wilson RE, McCracken KG	2012	Multilocus coalescent analysis of haemoglobin differentiation between low‐and high‐altitude populations of crested ducks (Lophonetta specularioides)	https://www.ncbi.nlm.nih.gov/nuccore/	https://www.ncbi.nlm.nih.gov/nuccore/ JN833829	NCBI GenBank	JN833829
Bulgarella M, Peters JL, Kopuchian C, Valqui TH, Wilson RE, McCracken KG	2012	Multilocus coalescent analysis of haemoglobin differentiation between low‐and high‐altitude populations of crested ducks (Lophonetta specularioides)	https://www.ncbi.nlm.nih.gov/nuccore/	https://www.ncbi.nlm.nih.gov/nuccore/ JN833830	NCBI GenBank	JN833830
Bulgarella M, Peters JL, Kopuchian C, Valqui TH, Wilson RE, McCracken KG	2012	Multilocus coalescent analysis of haemoglobin differentiation between low‐and high‐altitude populations of crested ducks (Lophonetta specularioides)	https://www.ncbi.nlm.nih.gov/nuccore/	https://www.ncbi.nlm.nih.gov/nuccore/ JN833831	NCBI GenBank	JN833831
Bulgarella M, Peters JL, Kopuchian C, Valqui TH, Wilson RE, McCracken KG	2012	Multilocus coalescent analysis of haemoglobin differentiation between low‐and high‐altitude populations of crested ducks (Lophonetta specularioides)	https://www.ncbi.nlm.nih.gov/nuccore/	https://www.ncbi.nlm.nih.gov/nuccore/ JN833832	NCBI GenBank	JN833832
Bulgarella M, Peters JL, Kopuchian C, Valqui TH, Wilson RE, McCracken KG	2012	Multilocus coalescent analysis of haemoglobin differentiation between low‐and high‐altitude populations of crested ducks (Lophonetta specularioides)	https://www.ncbi.nlm.nih.gov/nuccore/	https://www.ncbi.nlm.nih.gov/nuccore/ JN833833	NCBI GenBank	JN833833
Bulgarella M, Peters JL, Kopuchian C, Valqui TH, Wilson RE, McCracken KG	2012	Multilocus coalescent analysis of haemoglobin differentiation between low‐and high‐altitude populations of crested ducks (Lophonetta specularioides)	https://www.ncbi.nlm.nih.gov/nuccore/	https://www.ncbi.nlm.nih.gov/nuccore/ JN833834	NCBI GenBank	JN833834
Bulgarella M, Peters JL, Kopuchian C, Valqui TH, Wilson RE, McCracken KG	2012	Multilocus coalescent analysis of haemoglobin differentiation between low‐and high‐altitude populations of crested ducks (Lophonetta specularioides)	https://www.ncbi.nlm.nih.gov/nuccore/	https://www.ncbi.nlm.nih.gov/nuccore/ JN833835	NCBI GenBank	JN833835
Bulgarella M, Peters JL, Kopuchian C, Valqui TH, Wilson RE, McCracken KG	2012	Multilocus coalescent analysis of haemoglobin differentiation between low‐and high‐altitude populations of crested ducks (Lophonetta specularioides)	https://www.ncbi.nlm.nih.gov/nuccore/	https://www.ncbi.nlm.nih.gov/nuccore/ JN833836	NCBI GenBank	JN833836
Bulgarella M, Peters JL, Kopuchian C, Valqui TH, Wilson RE, McCracken KG	2012	Multilocus coalescent analysis of haemoglobin differentiation between low‐and high‐altitude populations of crested ducks (Lophonetta specularioides)	https://www.ncbi.nlm.nih.gov/nuccore/	https://www.ncbi.nlm.nih.gov/nuccore/ JN833837	NCBI GenBank	JN833837
Bulgarella M, Peters JL, Kopuchian C, Valqui TH, Wilson RE, McCracken KG	2012	Multilocus coalescent analysis of haemoglobin differentiation between low‐and high‐altitude populations of crested ducks (Lophonetta specularioides)	https://www.ncbi.nlm.nih.gov/nuccore/	https://www.ncbi.nlm.nih.gov/nuccore/ JN833838	NCBI GenBank	JN833838
Bulgarella M, Peters JL, Kopuchian C, Valqui TH, Wilson RE, McCracken KG	2012	Multilocus coalescent analysis of haemoglobin differentiation between low‐and high‐altitude populations of crested ducks (Lophonetta specularioides)	https://www.ncbi.nlm.nih.gov/nuccore/	https://www.ncbi.nlm.nih.gov/nuccore/ JN833839	NCBI GenBank	JN833839
Bulgarella M, Peters JL, Kopuchian C, Valqui TH, Wilson RE, McCracken KG	2012	Multilocus coalescent analysis of haemoglobin differentiation between low‐and high‐altitude populations of crested ducks (Lophonetta specularioides)	https://www.ncbi.nlm.nih.gov/nuccore/	https://www.ncbi.nlm.nih.gov/nuccore/ JN833840	NCBI GenBank	JN833840
Bulgarella M, Peters JL, Kopuchian C, Valqui TH, Wilson RE, McCracken KG	2012	Multilocus coalescent analysis of haemoglobin differentiation between low‐and high‐altitude populations of crested ducks (Lophonetta specularioides)	https://www.ncbi.nlm.nih.gov/nuccore/	https://www.ncbi.nlm.nih.gov/nuccore/ JN833841	NCBI GenBank	JN833841
Bulgarella M, Peters JL, Kopuchian C, Valqui TH, Wilson RE, McCracken KG	2012	Multilocus coalescent analysis of haemoglobin differentiation between low‐and high‐altitude populations of crested ducks (Lophonetta specularioides)	https://www.ncbi.nlm.nih.gov/nuccore/	https://www.ncbi.nlm.nih.gov/nuccore/ JN833842	NCBI GenBank	JN833842
Bulgarella M, Peters JL, Kopuchian C, Valqui TH, Wilson RE, McCracken KG	2012	Multilocus coalescent analysis of haemoglobin differentiation between low‐and high‐altitude populations of crested ducks (Lophonetta specularioides)	https://www.ncbi.nlm.nih.gov/nuccore/	https://www.ncbi.nlm.nih.gov/nuccore/ JN833843	NCBI GenBank	JN833843
Bulgarella M, Peters JL, Kopuchian C, Valqui TH, Wilson RE, McCracken KG	2012	Multilocus coalescent analysis of haemoglobin differentiation between low‐and high‐altitude populations of crested ducks (Lophonetta specularioides)	https://www.ncbi.nlm.nih.gov/nuccore/	https://www.ncbi.nlm.nih.gov/nuccore/ JN833844	NCBI GenBank	JN833844
Bulgarella M, Peters JL, Kopuchian C, Valqui TH, Wilson RE, McCracken KG	2012	Multilocus coalescent analysis of haemoglobin differentiation between low‐and high‐altitude populations of crested ducks (Lophonetta specularioides)	https://www.ncbi.nlm.nih.gov/nuccore/	https://www.ncbi.nlm.nih.gov/nuccore/ JN833845	NCBI GenBank	JN833845
Bulgarella M, Peters JL, Kopuchian C, Valqui TH, Wilson RE, McCracken KG	2012	Multilocus coalescent analysis of haemoglobin differentiation between low‐and high‐altitude populations of crested ducks (Lophonetta specularioides)	https://www.ncbi.nlm.nih.gov/nuccore/	https://www.ncbi.nlm.nih.gov/nuccore/ JN833846	NCBI GenBank	JN833846
Bulgarella M, Peters JL, Kopuchian C, Valqui TH, Wilson RE, McCracken KG	2012	Multilocus coalescent analysis of haemoglobin differentiation between low‐and high‐altitude populations of crested ducks (Lophonetta specularioides)	https://www.ncbi.nlm.nih.gov/nuccore/	https://www.ncbi.nlm.nih.gov/nuccore/ JN833847	NCBI GenBank	JN833847
Graham AM, Lavretsky P, Munoz-Fuentes V, Green AJ, Wilson RE, McCracken KG	2017	Migration-selection balance drives genetic differentiation in genes associated with high-altitude function in the speckled teal (Anas flavirostris) in the Andes	https://www.ncbi.nlm.nih.gov/nuccore/	https://www.ncbi.nlm.nih.gov/nuccore/ JN223305	NCBI GenBank	JN223305
Graham AM, Lavretsky P, Munoz-Fuentes V, Green AJ, Wilson RE, McCracken KG	2017	Migration-selection balance drives genetic differentiation in genes associated with high-altitude function in the speckled teal (Anas flavirostris) in the Andes	https://www.ncbi.nlm.nih.gov/nuccore/	https://www.ncbi.nlm.nih.gov/nuccore/ JN223306	NCBI GenBank	JN223306
Graham AM, Lavretsky P, Munoz-Fuentes V, Green AJ, Wilson RE, McCracken KG	2017	Migration-selection balance drives genetic differentiation in genes associated with high-altitude function in the speckled teal (Anas flavirostris) in the Andes	https://www.ncbi.nlm.nih.gov/nuccore/	https://www.ncbi.nlm.nih.gov/nuccore/ JN223307	NCBI GenBank	JN223307
Graham AM, Lavretsky P, Munoz-Fuentes V, Green AJ, Wilson RE, McCracken KG	2017	Migration-selection balance drives genetic differentiation in genes associated with high-altitude function in the speckled teal (Anas flavirostris) in the Andes	https://www.ncbi.nlm.nih.gov/nuccore/	https://www.ncbi.nlm.nih.gov/nuccore/ JN223308	NCBI GenBank	JN223308
Graham AM, Lavretsky P, Munoz-Fuentes V, Green AJ, Wilson RE, McCracken KG	2017	Migration-selection balance drives genetic differentiation in genes associated with high-altitude function in the speckled teal (Anas flavirostris) in the Andes	https://www.ncbi.nlm.nih.gov/nuccore/	https://www.ncbi.nlm.nih.gov/nuccore/ JN223309	NCBI GenBank	JN223309
Graham AM, Lavretsky P, Munoz-Fuentes V, Green AJ, Wilson RE, McCracken KG	2017	Migration-selection balance drives genetic differentiation in genes associated with high-altitude function in the speckled teal (Anas flavirostris) in the Andes	https://www.ncbi.nlm.nih.gov/nuccore/	https://www.ncbi.nlm.nih.gov/nuccore/ JN223310	NCBI GenBank	JN223310
Graham AM, Lavretsky P, Munoz-Fuentes V, Green AJ, Wilson RE, McCracken KG	2017	Migration-selection balance drives genetic differentiation in genes associated with high-altitude function in the speckled teal (Anas flavirostris) in the Andes	https://www.ncbi.nlm.nih.gov/nuccore/	https://www.ncbi.nlm.nih.gov/nuccore/ JN223311	NCBI GenBank	JN223311
Graham AM, Lavretsky P, Munoz-Fuentes V, Green AJ, Wilson RE, McCracken KG	2017	Migration-selection balance drives genetic differentiation in genes associated with high-altitude function in the speckled teal (Anas flavirostris) in the Andes	https://www.ncbi.nlm.nih.gov/nuccore/	https://www.ncbi.nlm.nih.gov/nuccore/ JN223312	NCBI GenBank	JN223312
Graham AM, Lavretsky P, Munoz-Fuentes V, Green AJ, Wilson RE, McCracken KG	2017	Migration-selection balance drives genetic differentiation in genes associated with high-altitude function in the speckled teal (Anas flavirostris) in the Andes	https://www.ncbi.nlm.nih.gov/nuccore/	https://www.ncbi.nlm.nih.gov/nuccore/ JN223313	NCBI GenBank	JN223313
Graham AM, Lavretsky P, Munoz-Fuentes V, Green AJ, Wilson RE, McCracken KG	2017	Migration-selection balance drives genetic differentiation in genes associated with high-altitude function in the speckled teal (Anas flavirostris) in the Andes	https://www.ncbi.nlm.nih.gov/nuccore/	https://www.ncbi.nlm.nih.gov/nuccore/ JN223314	NCBI GenBank	JN223314
Graham AM, Lavretsky P, Munoz-Fuentes V, Green AJ, Wilson RE, McCracken KG	2017	Migration-selection balance drives genetic differentiation in genes associated with high-altitude function in the speckled teal (Anas flavirostris) in the Andes	https://www.ncbi.nlm.nih.gov/nuccore/	https://www.ncbi.nlm.nih.gov/nuccore/ JN223315	NCBI GenBank	JN223315
Graham AM, Lavretsky P, Munoz-Fuentes V, Green AJ, Wilson RE, McCracken KG	2017	Migration-selection balance drives genetic differentiation in genes associated with high-altitude function in the speckled teal (Anas flavirostris) in the Andes	https://www.ncbi.nlm.nih.gov/nuccore/	https://www.ncbi.nlm.nih.gov/nuccore/ JN223316	NCBI GenBank	JN223316
Graham AM, Lavretsky P, Munoz-Fuentes V, Green AJ, Wilson RE, McCracken KG	2017	Migration-selection balance drives genetic differentiation in genes associated with high-altitude function in the speckled teal (Anas flavirostris) in the Andes	https://www.ncbi.nlm.nih.gov/nuccore/	https://www.ncbi.nlm.nih.gov/nuccore/ JN223317	NCBI GenBank	JN223317
Graham AM, Lavretsky P, Munoz-Fuentes V, Green AJ, Wilson RE, McCracken KG	2017	Migration-selection balance drives genetic differentiation in genes associated with high-altitude function in the speckled teal (Anas flavirostris) in the Andes	https://www.ncbi.nlm.nih.gov/nuccore/	https://www.ncbi.nlm.nih.gov/nuccore/ JN223318	NCBI GenBank	JN223318
Graham AM, Lavretsky P, Munoz-Fuentes V, Green AJ, Wilson RE, McCracken KG	2017	Migration-selection balance drives genetic differentiation in genes associated with high-altitude function in the speckled teal (Anas flavirostris) in the Andes	https://www.ncbi.nlm.nih.gov/nuccore/	https://www.ncbi.nlm.nih.gov/nuccore/ JN223319	NCBI GenBank	JN223319
Graham AM, Lavretsky P, Munoz-Fuentes V, Green AJ, Wilson RE, McCracken KG	2017	Migration-selection balance drives genetic differentiation in genes associated with high-altitude function in the speckled teal (Anas flavirostris) in the Andes	https://www.ncbi.nlm.nih.gov/nuccore/	https://www.ncbi.nlm.nih.gov/nuccore/ JN223320	NCBI GenBank	JN223320
Graham AM, Lavretsky P, Munoz-Fuentes V, Green AJ, Wilson RE, McCracken KG	2017	Migration-selection balance drives genetic differentiation in genes associated with high-altitude function in the speckled teal (Anas flavirostris) in the Andes	https://www.ncbi.nlm.nih.gov/nuccore/	https://www.ncbi.nlm.nih.gov/nuccore/ JN223321	NCBI GenBank	JN223321
Graham AM, Lavretsky P, Munoz-Fuentes V, Green AJ, Wilson RE, McCracken KG	2017	Migration-selection balance drives genetic differentiation in genes associated with high-altitude function in the speckled teal (Anas flavirostris) in the Andes	https://www.ncbi.nlm.nih.gov/nuccore/	https://www.ncbi.nlm.nih.gov/nuccore/ JN223322	NCBI GenBank	JN223322
Graham AM, Lavretsky P, Munoz-Fuentes V, Green AJ, Wilson RE, McCracken KG	2017	Migration-selection balance drives genetic differentiation in genes associated with high-altitude function in the speckled teal (Anas flavirostris) in the Andes	https://www.ncbi.nlm.nih.gov/nuccore/	https://www.ncbi.nlm.nih.gov/nuccore/ JN223323	NCBI GenBank	JN223323
Graham AM, Lavretsky P, Munoz-Fuentes V, Green AJ, Wilson RE, McCracken KG	2017	Migration-selection balance drives genetic differentiation in genes associated with high-altitude function in the speckled teal (Anas flavirostris) in the Andes	https://www.ncbi.nlm.nih.gov/nuccore/	https://www.ncbi.nlm.nih.gov/nuccore/ JN223324	NCBI GenBank	JN223324
Graham AM, Lavretsky P, Munoz-Fuentes V, Green AJ, Wilson RE, McCracken KG	2017	Migration-selection balance drives genetic differentiation in genes associated with high-altitude function in the speckled teal (Anas flavirostris) in the Andes	https://www.ncbi.nlm.nih.gov/nuccore/	https://www.ncbi.nlm.nih.gov/nuccore/ JN223325	NCBI GenBank	JN223325
Graham AM, Lavretsky P, Munoz-Fuentes V, Green AJ, Wilson RE, McCracken KG	2017	Migration-selection balance drives genetic differentiation in genes associated with high-altitude function in the speckled teal (Anas flavirostris) in the Andes	https://www.ncbi.nlm.nih.gov/nuccore/	https://www.ncbi.nlm.nih.gov/nuccore/ JN223326	NCBI GenBank	JN223326
Graham AM, Lavretsky P, Munoz-Fuentes V, Green AJ, Wilson RE, McCracken KG	2017	Migration-selection balance drives genetic differentiation in genes associated with high-altitude function in the speckled teal (Anas flavirostris) in the Andes	https://www.ncbi.nlm.nih.gov/nuccore/	https://www.ncbi.nlm.nih.gov/nuccore/ JN223327	NCBI GenBank	JN223327
Graham AM, Lavretsky P, Munoz-Fuentes V, Green AJ, Wilson RE, McCracken KG	2017	Migration-selection balance drives genetic differentiation in genes associated with high-altitude function in the speckled teal (Anas flavirostris) in the Andes	https://www.ncbi.nlm.nih.gov/nuccore/	https://www.ncbi.nlm.nih.gov/nuccore/ JN223328	NCBI GenBank	JN223328
Graham AM, Lavretsky P, Munoz-Fuentes V, Green AJ, Wilson RE, McCracken KG	2017	Migration-selection balance drives genetic differentiation in genes associated with high-altitude function in the speckled teal (Anas flavirostris) in the Andes	https://www.ncbi.nlm.nih.gov/nuccore/	https://www.ncbi.nlm.nih.gov/nuccore/ JN223329	NCBI GenBank	JN223329
Graham AM, Lavretsky P, Munoz-Fuentes V, Green AJ, Wilson RE, McCracken KG	2017	Migration-selection balance drives genetic differentiation in genes associated with high-altitude function in the speckled teal (Anas flavirostris) in the Andes	https://www.ncbi.nlm.nih.gov/nuccore/	https://www.ncbi.nlm.nih.gov/nuccore/ JN223330	NCBI GenBank	JN223330
Graham AM, Lavretsky P, Munoz-Fuentes V, Green AJ, Wilson RE, McCracken KG	2017	Migration-selection balance drives genetic differentiation in genes associated with high-altitude function in the speckled teal (Anas flavirostris) in the Andes	https://www.ncbi.nlm.nih.gov/nuccore/	https://www.ncbi.nlm.nih.gov/nuccore/ JN223331	NCBI GenBank	JN223331
Graham AM, Lavretsky P, Munoz-Fuentes V, Green AJ, Wilson RE, McCracken KG	2017	Migration-selection balance drives genetic differentiation in genes associated with high-altitude function in the speckled teal (Anas flavirostris) in the Andes	https://www.ncbi.nlm.nih.gov/nuccore/	https://www.ncbi.nlm.nih.gov/nuccore/ JN223332	NCBI GenBank	JN223332
Graham AM, Lavretsky P, Munoz-Fuentes V, Green AJ, Wilson RE, McCracken KG	2017	Migration-selection balance drives genetic differentiation in genes associated with high-altitude function in the speckled teal (Anas flavirostris) in the Andes	https://www.ncbi.nlm.nih.gov/nuccore/	https://www.ncbi.nlm.nih.gov/nuccore/ JN223333	NCBI GenBank	JN223333
Graham AM, Lavretsky P, Munoz-Fuentes V, Green AJ, Wilson RE, McCracken KG	2017	Migration-selection balance drives genetic differentiation in genes associated with high-altitude function in the speckled teal (Anas flavirostris) in the Andes	https://www.ncbi.nlm.nih.gov/nuccore/	https://www.ncbi.nlm.nih.gov/nuccore/ JN223334	NCBI GenBank	JN223334
Graham AM, Lavretsky P, Munoz-Fuentes V, Green AJ, Wilson RE, McCracken KG	2017	Migration-selection balance drives genetic differentiation in genes associated with high-altitude function in the speckled teal (Anas flavirostris) in the Andes	https://www.ncbi.nlm.nih.gov/nuccore/	https://www.ncbi.nlm.nih.gov/nuccore/ JN223335	NCBI GenBank	JN223335
Graham AM, Lavretsky P, Munoz-Fuentes V, Green AJ, Wilson RE, McCracken KG	2017	Migration-selection balance drives genetic differentiation in genes associated with high-altitude function in the speckled teal (Anas flavirostris) in the Andes	https://www.ncbi.nlm.nih.gov/nuccore/	https://www.ncbi.nlm.nih.gov/nuccore/ JN223336	NCBI GenBank	JN223336
Graham AM, Lavretsky P, Munoz-Fuentes V, Green AJ, Wilson RE, McCracken KG	2017	Migration-selection balance drives genetic differentiation in genes associated with high-altitude function in the speckled teal (Anas flavirostris) in the Andes	https://www.ncbi.nlm.nih.gov/nuccore/	https://www.ncbi.nlm.nih.gov/nuccore/ JN223337	NCBI GenBank	JN223337
Graham AM, Lavretsky P, Munoz-Fuentes V, Green AJ, Wilson RE, McCracken KG	2017	Migration-selection balance drives genetic differentiation in genes associated with high-altitude function in the speckled teal (Anas flavirostris) in the Andes	https://www.ncbi.nlm.nih.gov/nuccore/	https://www.ncbi.nlm.nih.gov/nuccore/ MG520106	NCBI GenBank	MG520106
Graham AM, Lavretsky P, Munoz-Fuentes V, Green AJ, Wilson RE, McCracken KG	2017	Migration-selection balance drives genetic differentiation in genes associated with high-altitude function in the speckled teal (Anas flavirostris) in the Andes	https://www.ncbi.nlm.nih.gov/nuccore/	https://www.ncbi.nlm.nih.gov/nuccore/ MG520107	NCBI GenBank	MG520107
Graham AM, Lavretsky P, Munoz-Fuentes V, Green AJ, Wilson RE, McCracken KG	2017	Migration-selection balance drives genetic differentiation in genes associated with high-altitude function in the speckled teal (Anas flavirostris) in the Andes	https://www.ncbi.nlm.nih.gov/nuccore/	https://www.ncbi.nlm.nih.gov/nuccore/ MG520108	NCBI GenBank	MG520108
Graham AM, Lavretsky P, Munoz-Fuentes V, Green AJ, Wilson RE, McCracken KG	2017	Migration-selection balance drives genetic differentiation in genes associated with high-altitude function in the speckled teal (Anas flavirostris) in the Andes	https://www.ncbi.nlm.nih.gov/nuccore/	https://www.ncbi.nlm.nih.gov/nuccore/ MG520109	NCBI GenBank	MG520109
Graham AM, Lavretsky P, Munoz-Fuentes V, Green AJ, Wilson RE, McCracken KG	2017	Migration-selection balance drives genetic differentiation in genes associated with high-altitude function in the speckled teal (Anas flavirostris) in the Andes	https://www.ncbi.nlm.nih.gov/nuccore/	https://www.ncbi.nlm.nih.gov/nuccore/ MG520110	NCBI GenBank	MG520110
Graham AM, Lavretsky P, Munoz-Fuentes V, Green AJ, Wilson RE, McCracken KG	2017	Migration-selection balance drives genetic differentiation in genes associated with high-altitude function in the speckled teal (Anas flavirostris) in the Andes	https://www.ncbi.nlm.nih.gov/nuccore/	https://www.ncbi.nlm.nih.gov/nuccore/ MG520111	NCBI GenBank	MG520111
Graham AM, Lavretsky P, Munoz-Fuentes V, Green AJ, Wilson RE, McCracken KG	2017	Migration-selection balance drives genetic differentiation in genes associated with high-altitude function in the speckled teal (Anas flavirostris) in the Andes	https://www.ncbi.nlm.nih.gov/nuccore/	https://www.ncbi.nlm.nih.gov/nuccore/ MG520112	NCBI GenBank	MG520112
Graham AM, Lavretsky P, Munoz-Fuentes V, Green AJ, Wilson RE, McCracken KG	2017	Migration-selection balance drives genetic differentiation in genes associated with high-altitude function in the speckled teal (Anas flavirostris) in the Andes	https://www.ncbi.nlm.nih.gov/nuccore/	https://www.ncbi.nlm.nih.gov/nuccore/ MG520113	NCBI GenBank	MG520113
Graham AM, Lavretsky P, Munoz-Fuentes V, Green AJ, Wilson RE, McCracken KG	2017	Migration-selection balance drives genetic differentiation in genes associated with high-altitude function in the speckled teal (Anas flavirostris) in the Andes	https://www.ncbi.nlm.nih.gov/nuccore/	https://www.ncbi.nlm.nih.gov/nuccore/ MG520114	NCBI GenBank	MG520114
Graham AM, Lavretsky P, Munoz-Fuentes V, Green AJ, Wilson RE, McCracken KG	2017	Migration-selection balance drives genetic differentiation in genes associated with high-altitude function in the speckled teal (Anas flavirostris) in the Andes	https://www.ncbi.nlm.nih.gov/nuccore/	https://www.ncbi.nlm.nih.gov/nuccore/ MG520115	NCBI GenBank	MG520115
Graham AM, Lavretsky P, Munoz-Fuentes V, Green AJ, Wilson RE, McCracken KG	2017	Migration-selection balance drives genetic differentiation in genes associated with high-altitude function in the speckled teal (Anas flavirostris) in the Andes	https://www.ncbi.nlm.nih.gov/nuccore/	https://www.ncbi.nlm.nih.gov/nuccore/ MG520116	NCBI GenBank	MG520116
Graham AM, Lavretsky P, Munoz-Fuentes V, Green AJ, Wilson RE, McCracken KG	2017	Migration-selection balance drives genetic differentiation in genes associated with high-altitude function in the speckled teal (Anas flavirostris) in the Andes	https://www.ncbi.nlm.nih.gov/nuccore/	https://www.ncbi.nlm.nih.gov/nuccore/ MG520117	NCBI GenBank	MG520117
Graham AM, Lavretsky P, Munoz-Fuentes V, Green AJ, Wilson RE, McCracken KG	2017	Migration-selection balance drives genetic differentiation in genes associated with high-altitude function in the speckled teal (Anas flavirostris) in the Andes	https://www.ncbi.nlm.nih.gov/nuccore/	https://www.ncbi.nlm.nih.gov/nuccore/ MG520118	NCBI GenBank	MG520118
Graham AM, Lavretsky P, Munoz-Fuentes V, Green AJ, Wilson RE, McCracken KG	2017	Migration-selection balance drives genetic differentiation in genes associated with high-altitude function in the speckled teal (Anas flavirostris) in the Andes	https://www.ncbi.nlm.nih.gov/nuccore/	https://www.ncbi.nlm.nih.gov/nuccore/ MG520119	NCBI GenBank	MG520119
Graham AM, Lavretsky P, Munoz-Fuentes V, Green AJ, Wilson RE, McCracken KG	2017	Migration-selection balance drives genetic differentiation in genes associated with high-altitude function in the speckled teal (Anas flavirostris) in the Andes	https://www.ncbi.nlm.nih.gov/nuccore/	https://www.ncbi.nlm.nih.gov/nuccore/ MG520120	NCBI GenBank	MG520120
Graham AM, Lavretsky P, Munoz-Fuentes V, Green AJ, Wilson RE, McCracken KG	2017	Migration-selection balance drives genetic differentiation in genes associated with high-altitude function in the speckled teal (Anas flavirostris) in the Andes	https://www.ncbi.nlm.nih.gov/nuccore/	https://www.ncbi.nlm.nih.gov/nuccore/ MG520121	NCBI GenBank	MG520121
Graham AM, Lavretsky P, Munoz-Fuentes V, Green AJ, Wilson RE, McCracken KG	2017	Migration-selection balance drives genetic differentiation in genes associated with high-altitude function in the speckled teal (Anas flavirostris) in the Andes	https://www.ncbi.nlm.nih.gov/nuccore/	https://www.ncbi.nlm.nih.gov/nuccore/ MG520122	NCBI GenBank	MG520122
Graham AM, Lavretsky P, Munoz-Fuentes V, Green AJ, Wilson RE, McCracken KG	2017	Migration-selection balance drives genetic differentiation in genes associated with high-altitude function in the speckled teal (Anas flavirostris) in the Andes	https://www.ncbi.nlm.nih.gov/nuccore/	https://www.ncbi.nlm.nih.gov/nuccore/ MG520123	NCBI GenBank	MG520123
Graham AM, Lavretsky P, Munoz-Fuentes V, Green AJ, Wilson RE, McCracken KG	2017	Migration-selection balance drives genetic differentiation in genes associated with high-altitude function in the speckled teal (Anas flavirostris) in the Andes	https://www.ncbi.nlm.nih.gov/nuccore/	https://www.ncbi.nlm.nih.gov/nuccore/ MG520124	NCBI GenBank	MG520124
Graham AM, Lavretsky P, Munoz-Fuentes V, Green AJ, Wilson RE, McCracken KG	2017	Migration-selection balance drives genetic differentiation in genes associated with high-altitude function in the speckled teal (Anas flavirostris) in the Andes	https://www.ncbi.nlm.nih.gov/nuccore/	https://www.ncbi.nlm.nih.gov/nuccore/ MG520125	NCBI GenBank	MG520125
Graham AM, Lavretsky P, Munoz-Fuentes V, Green AJ, Wilson RE, McCracken KG	2017	Migration-selection balance drives genetic differentiation in genes associated with high-altitude function in the speckled teal (Anas flavirostris) in the Andes	https://www.ncbi.nlm.nih.gov/nuccore/	https://www.ncbi.nlm.nih.gov/nuccore/ MG520126	NCBI GenBank	MG520126
Graham AM, Lavretsky P, Munoz-Fuentes V, Green AJ, Wilson RE, McCracken KG	2017	Migration-selection balance drives genetic differentiation in genes associated with high-altitude function in the speckled teal (Anas flavirostris) in the Andes	https://www.ncbi.nlm.nih.gov/nuccore/	https://www.ncbi.nlm.nih.gov/nuccore/ MG520127	NCBI GenBank	MG520127
Graham AM, Lavretsky P, Munoz-Fuentes V, Green AJ, Wilson RE, McCracken KG	2017	Migration-selection balance drives genetic differentiation in genes associated with high-altitude function in the speckled teal (Anas flavirostris) in the Andes	https://www.ncbi.nlm.nih.gov/nuccore/	https://www.ncbi.nlm.nih.gov/nuccore/ MG520128	NCBI GenBank	MG520128
Graham AM, Lavretsky P, Munoz-Fuentes V, Green AJ, Wilson RE, McCracken KG	2017	Migration-selection balance drives genetic differentiation in genes associated with high-altitude function in the speckled teal (Anas flavirostris) in the Andes	https://www.ncbi.nlm.nih.gov/nuccore/	https://www.ncbi.nlm.nih.gov/nuccore/ MG520129	NCBI GenBank	MG520129
Graham AM, Lavretsky P, Munoz-Fuentes V, Green AJ, Wilson RE, McCracken KG	2017	Migration-selection balance drives genetic differentiation in genes associated with high-altitude function in the speckled teal (Anas flavirostris) in the Andes	https://www.ncbi.nlm.nih.gov/nuccore/	https://www.ncbi.nlm.nih.gov/nuccore/ MG520130	NCBI GenBank	MG520130
Graham AM, Lavretsky P, Munoz-Fuentes V, Green AJ, Wilson RE, McCracken KG	2017	Migration-selection balance drives genetic differentiation in genes associated with high-altitude function in the speckled teal (Anas flavirostris) in the Andes	https://www.ncbi.nlm.nih.gov/nuccore/	https://www.ncbi.nlm.nih.gov/nuccore/ MG520131	NCBI GenBank	MG520131
Graham AM, Lavretsky P, Munoz-Fuentes V, Green AJ, Wilson RE, McCracken KG	2017	Migration-selection balance drives genetic differentiation in genes associated with high-altitude function in the speckled teal (Anas flavirostris) in the Andes	https://www.ncbi.nlm.nih.gov/nuccore/	https://www.ncbi.nlm.nih.gov/nuccore/ MG520132	NCBI GenBank	MG520132
Graham AM, Lavretsky P, Munoz-Fuentes V, Green AJ, Wilson RE, McCracken KG	2017	Migration-selection balance drives genetic differentiation in genes associated with high-altitude function in the speckled teal (Anas flavirostris) in the Andes	https://www.ncbi.nlm.nih.gov/nuccore/	https://www.ncbi.nlm.nih.gov/nuccore/ MG520133	NCBI GenBank	MG520133
Graham AM, Lavretsky P, Munoz-Fuentes V, Green AJ, Wilson RE, McCracken KG	2017	Migration-selection balance drives genetic differentiation in genes associated with high-altitude function in the speckled teal (Anas flavirostris) in the Andes	https://www.ncbi.nlm.nih.gov/nuccore/	https://www.ncbi.nlm.nih.gov/nuccore/ MG520134	NCBI GenBank	MG520134
Graham AM, Lavretsky P, Munoz-Fuentes V, Green AJ, Wilson RE, McCracken KG	2017	Migration-selection balance drives genetic differentiation in genes associated with high-altitude function in the speckled teal (Anas flavirostris) in the Andes	https://www.ncbi.nlm.nih.gov/nuccore/	https://www.ncbi.nlm.nih.gov/nuccore/ MG520135	NCBI GenBank	MG520135
Graham AM, Lavretsky P, Munoz-Fuentes V, Green AJ, Wilson RE, McCracken KG	2017	Migration-selection balance drives genetic differentiation in genes associated with high-altitude function in the speckled teal (Anas flavirostris) in the Andes	https://www.ncbi.nlm.nih.gov/nuccore/	https://www.ncbi.nlm.nih.gov/nuccore/ MG520136	NCBI GenBank	MG520136
Graham AM, Lavretsky P, Munoz-Fuentes V, Green AJ, Wilson RE, McCracken KG	2017	Migration-selection balance drives genetic differentiation in genes associated with high-altitude function in the speckled teal (Anas flavirostris) in the Andes	https://www.ncbi.nlm.nih.gov/nuccore/	https://www.ncbi.nlm.nih.gov/nuccore/ MG520137	NCBI GenBank	MG520137
Graham AM, Lavretsky P, Munoz-Fuentes V, Green AJ, Wilson RE, McCracken KG	2017	Migration-selection balance drives genetic differentiation in genes associated with high-altitude function in the speckled teal (Anas flavirostris) in the Andes	https://www.ncbi.nlm.nih.gov/nuccore/	https://www.ncbi.nlm.nih.gov/nuccore/ MG520138	NCBI GenBank	MG520138
Graham AM, Lavretsky P, Munoz-Fuentes V, Green AJ, Wilson RE, McCracken KG	2017	Migration-selection balance drives genetic differentiation in genes associated with high-altitude function in the speckled teal (Anas flavirostris) in the Andes	https://www.ncbi.nlm.nih.gov/nuccore/	https://www.ncbi.nlm.nih.gov/nuccore/ MG520139	NCBI GenBank	MG520139
Graham AM, Lavretsky P, Munoz-Fuentes V, Green AJ, Wilson RE, McCracken KG	2017	Migration-selection balance drives genetic differentiation in genes associated with high-altitude function in the speckled teal (Anas flavirostris) in the Andes	https://www.ncbi.nlm.nih.gov/nuccore/	https://www.ncbi.nlm.nih.gov/nuccore/ MG520140	NCBI GenBank	MG520140
Graham AM, Lavretsky P, Munoz-Fuentes V, Green AJ, Wilson RE, McCracken KG	2017	Migration-selection balance drives genetic differentiation in genes associated with high-altitude function in the speckled teal (Anas flavirostris) in the Andes	https://www.ncbi.nlm.nih.gov/nuccore/	https://www.ncbi.nlm.nih.gov/nuccore/ MG520141	NCBI GenBank	MG520141
Graham AM, Lavretsky P, Munoz-Fuentes V, Green AJ, Wilson RE, McCracken KG	2017	Migration-selection balance drives genetic differentiation in genes associated with high-altitude function in the speckled teal (Anas flavirostris) in the Andes	https://www.ncbi.nlm.nih.gov/nuccore/	https://www.ncbi.nlm.nih.gov/nuccore/ MG520142	NCBI GenBank	MG520142
Graham AM, Lavretsky P, Munoz-Fuentes V, Green AJ, Wilson RE, McCracken KG	2017	Migration-selection balance drives genetic differentiation in genes associated with high-altitude function in the speckled teal (Anas flavirostris) in the Andes	https://www.ncbi.nlm.nih.gov/nuccore/	https://www.ncbi.nlm.nih.gov/nuccore/ MG520143	NCBI GenBank	MG520143
Graham AM, Lavretsky P, Munoz-Fuentes V, Green AJ, Wilson RE, McCracken KG	2017	Migration-selection balance drives genetic differentiation in genes associated with high-altitude function in the speckled teal (Anas flavirostris) in the Andes	https://www.ncbi.nlm.nih.gov/nuccore/	https://www.ncbi.nlm.nih.gov/nuccore/ MG520144	NCBI GenBank	MG520144
Graham AM, Lavretsky P, Munoz-Fuentes V, Green AJ, Wilson RE, McCracken KG	2017	Migration-selection balance drives genetic differentiation in genes associated with high-altitude function in the speckled teal (Anas flavirostris) in the Andes	https://www.ncbi.nlm.nih.gov/nuccore/	https://www.ncbi.nlm.nih.gov/nuccore/ MG520145	NCBI GenBank	MG520145
Graham AM, Lavretsky P, Munoz-Fuentes V, Green AJ, Wilson RE, McCracken KG	2017	Migration-selection balance drives genetic differentiation in genes associated with high-altitude function in the speckled teal (Anas flavirostris) in the Andes	https://www.ncbi.nlm.nih.gov/nuccore/	https://www.ncbi.nlm.nih.gov/nuccore/ MG520146	NCBI GenBank	MG520146
Graham AM, Lavretsky P, Munoz-Fuentes V, Green AJ, Wilson RE, McCracken KG	2017	Migration-selection balance drives genetic differentiation in genes associated with high-altitude function in the speckled teal (Anas flavirostris) in the Andes	https://www.ncbi.nlm.nih.gov/nuccore/	https://www.ncbi.nlm.nih.gov/nuccore/ MG520147	NCBI GenBank	MG520147
Graham AM, Lavretsky P, Munoz-Fuentes V, Green AJ, Wilson RE, McCracken KG	2017	Migration-selection balance drives genetic differentiation in genes associated with high-altitude function in the speckled teal (Anas flavirostris) in the Andes	https://www.ncbi.nlm.nih.gov/nuccore/	https://www.ncbi.nlm.nih.gov/nuccore/ MG520148	NCBI GenBank	MG520148
Graham AM, Lavretsky P, Munoz-Fuentes V, Green AJ, Wilson RE, McCracken KG	2017	Migration-selection balance drives genetic differentiation in genes associated with high-altitude function in the speckled teal (Anas flavirostris) in the Andes	https://www.ncbi.nlm.nih.gov/nuccore/	https://www.ncbi.nlm.nih.gov/nuccore/ MG520149	NCBI GenBank	MG520149
Graham AM, Lavretsky P, Munoz-Fuentes V, Green AJ, Wilson RE, McCracken KG	2017	Migration-selection balance drives genetic differentiation in genes associated with high-altitude function in the speckled teal (Anas flavirostris) in the Andes	https://www.ncbi.nlm.nih.gov/nuccore/	https://www.ncbi.nlm.nih.gov/nuccore/ MG520150	NCBI GenBank	MG520150
Graham AM, Lavretsky P, Munoz-Fuentes V, Green AJ, Wilson RE, McCracken KG	2017	Migration-selection balance drives genetic differentiation in genes associated with high-altitude function in the speckled teal (Anas flavirostris) in the Andes	https://www.ncbi.nlm.nih.gov/nuccore/	https://www.ncbi.nlm.nih.gov/nuccore/ MG520151	NCBI GenBank	MG520151
Graham AM, Lavretsky P, Munoz-Fuentes V, Green AJ, Wilson RE, McCracken KG	2017	Migration-selection balance drives genetic differentiation in genes associated with high-altitude function in the speckled teal (Anas flavirostris) in the Andes	https://www.ncbi.nlm.nih.gov/nuccore/	https://www.ncbi.nlm.nih.gov/nuccore/ MG520152	NCBI GenBank	MG520152
Graham AM, Lavretsky P, Munoz-Fuentes V, Green AJ, Wilson RE, McCracken KG	2017	Migration-selection balance drives genetic differentiation in genes associated with high-altitude function in the speckled teal (Anas flavirostris) in the Andes	https://www.ncbi.nlm.nih.gov/nuccore/	https://www.ncbi.nlm.nih.gov/nuccore/ MG520153	NCBI GenBank	MG520153
Graham AM, Lavretsky P, Munoz-Fuentes V, Green AJ, Wilson RE, McCracken KG	2017	Migration-selection balance drives genetic differentiation in genes associated with high-altitude function in the speckled teal (Anas flavirostris) in the Andes	https://www.ncbi.nlm.nih.gov/nuccore/	https://www.ncbi.nlm.nih.gov/nuccore/ MG520154	NCBI GenBank	MG520154
Graham AM, Lavretsky P, Munoz-Fuentes V, Green AJ, Wilson RE, McCracken KG	2017	Migration-selection balance drives genetic differentiation in genes associated with high-altitude function in the speckled teal (Anas flavirostris) in the Andes	https://www.ncbi.nlm.nih.gov/nuccore/	https://www.ncbi.nlm.nih.gov/nuccore/ MG520155	NCBI GenBank	MG520155
Graham AM, Lavretsky P, Munoz-Fuentes V, Green AJ, Wilson RE, McCracken KG	2017	Migration-selection balance drives genetic differentiation in genes associated with high-altitude function in the speckled teal (Anas flavirostris) in the Andes	https://www.ncbi.nlm.nih.gov/nuccore/	https://www.ncbi.nlm.nih.gov/nuccore/ MG520156	NCBI GenBank	MG520156
Graham AM, Lavretsky P, Munoz-Fuentes V, Green AJ, Wilson RE, McCracken KG	2017	Migration-selection balance drives genetic differentiation in genes associated with high-altitude function in the speckled teal (Anas flavirostris) in the Andes	https://www.ncbi.nlm.nih.gov/nuccore/	https://www.ncbi.nlm.nih.gov/nuccore/ MG520157	NCBI GenBank	MG520157
Graham AM, Lavretsky P, Munoz-Fuentes V, Green AJ, Wilson RE, McCracken KG	2017	Migration-selection balance drives genetic differentiation in genes associated with high-altitude function in the speckled teal (Anas flavirostris) in the Andes	https://www.ncbi.nlm.nih.gov/nuccore/	https://www.ncbi.nlm.nih.gov/nuccore/ MG520158	NCBI GenBank	MG520158
Graham AM, Lavretsky P, Munoz-Fuentes V, Green AJ, Wilson RE, McCracken KG	2017	Migration-selection balance drives genetic differentiation in genes associated with high-altitude function in the speckled teal (Anas flavirostris) in the Andes	https://www.ncbi.nlm.nih.gov/nuccore/	https://www.ncbi.nlm.nih.gov/nuccore/ MG520159	NCBI GenBank	MG520159
Graham AM, Lavretsky P, Munoz-Fuentes V, Green AJ, Wilson RE, McCracken KG	2017	Migration-selection balance drives genetic differentiation in genes associated with high-altitude function in the speckled teal (Anas flavirostris) in the Andes	https://www.ncbi.nlm.nih.gov/nuccore/	https://www.ncbi.nlm.nih.gov/nuccore/ MG520160	NCBI GenBank	MG520160
Graham AM, Lavretsky P, Munoz-Fuentes V, Green AJ, Wilson RE, McCracken KG	2017	Migration-selection balance drives genetic differentiation in genes associated with high-altitude function in the speckled teal (Anas flavirostris) in the Andes	https://www.ncbi.nlm.nih.gov/nuccore/	https://www.ncbi.nlm.nih.gov/nuccore/ MG520161	NCBI GenBank	MG520161
Graham AM, Lavretsky P, Munoz-Fuentes V, Green AJ, Wilson RE, McCracken KG	2017	Migration-selection balance drives genetic differentiation in genes associated with high-altitude function in the speckled teal (Anas flavirostris) in the Andes	https://www.ncbi.nlm.nih.gov/nuccore/	https://www.ncbi.nlm.nih.gov/nuccore/ MG520162	NCBI GenBank	MG520162
Graham AM, Lavretsky P, Munoz-Fuentes V, Green AJ, Wilson RE, McCracken KG	2017	Migration-selection balance drives genetic differentiation in genes associated with high-altitude function in the speckled teal (Anas flavirostris) in the Andes	https://www.ncbi.nlm.nih.gov/nuccore/	https://www.ncbi.nlm.nih.gov/nuccore/ MG520163	NCBI GenBank	MG520163
Graham AM, Lavretsky P, Munoz-Fuentes V, Green AJ, Wilson RE, McCracken KG	2017	Migration-selection balance drives genetic differentiation in genes associated with high-altitude function in the speckled teal (Anas flavirostris) in the Andes	https://www.ncbi.nlm.nih.gov/nuccore/	https://www.ncbi.nlm.nih.gov/nuccore/ MG520164	NCBI GenBank	MG520164
Graham AM, Lavretsky P, Munoz-Fuentes V, Green AJ, Wilson RE, McCracken KG	2017	Migration-selection balance drives genetic differentiation in genes associated with high-altitude function in the speckled teal (Anas flavirostris) in the Andes	https://www.ncbi.nlm.nih.gov/nuccore/	https://www.ncbi.nlm.nih.gov/nuccore/ MG520165	NCBI GenBank	MG520165
Graham AM, Lavretsky P, Munoz-Fuentes V, Green AJ, Wilson RE, McCracken KG	2017	Migration-selection balance drives genetic differentiation in genes associated with high-altitude function in the speckled teal (Anas flavirostris) in the Andes	https://www.ncbi.nlm.nih.gov/nuccore/	https://www.ncbi.nlm.nih.gov/nuccore/ MG520166	NCBI GenBank	MG520166
Graham AM, Lavretsky P, Munoz-Fuentes V, Green AJ, Wilson RE, McCracken KG	2017	Migration-selection balance drives genetic differentiation in genes associated with high-altitude function in the speckled teal (Anas flavirostris) in the Andes	https://www.ncbi.nlm.nih.gov/nuccore/	https://www.ncbi.nlm.nih.gov/nuccore/ MG520167	NCBI GenBank	MG520167
Graham AM, Lavretsky P, Munoz-Fuentes V, Green AJ, Wilson RE, McCracken KG	2017	Migration-selection balance drives genetic differentiation in genes associated with high-altitude function in the speckled teal (Anas flavirostris) in the Andes	https://www.ncbi.nlm.nih.gov/nuccore/	https://www.ncbi.nlm.nih.gov/nuccore/ MG520168	NCBI GenBank	MG520168
Graham AM, Lavretsky P, Munoz-Fuentes V, Green AJ, Wilson RE, McCracken KG	2017	Migration-selection balance drives genetic differentiation in genes associated with high-altitude function in the speckled teal (Anas flavirostris) in the Andes	https://www.ncbi.nlm.nih.gov/nuccore/	https://www.ncbi.nlm.nih.gov/nuccore/ MG520169	NCBI GenBank	MG520169
Graham AM, Lavretsky P, Munoz-Fuentes V, Green AJ, Wilson RE, McCracken KG	2017	Migration-selection balance drives genetic differentiation in genes associated with high-altitude function in the speckled teal (Anas flavirostris) in the Andes	https://www.ncbi.nlm.nih.gov/nuccore/	https://www.ncbi.nlm.nih.gov/nuccore/ MG520170	NCBI GenBank	MG520170
Graham AM, Lavretsky P, Munoz-Fuentes V, Green AJ, Wilson RE, McCracken KG	2017	Migration-selection balance drives genetic differentiation in genes associated with high-altitude function in the speckled teal (Anas flavirostris) in the Andes	https://www.ncbi.nlm.nih.gov/nuccore/	https://www.ncbi.nlm.nih.gov/nuccore/ MG520171	NCBI GenBank	MG520171
Graham AM, Lavretsky P, Munoz-Fuentes V, Green AJ, Wilson RE, McCracken KG	2017	Migration-selection balance drives genetic differentiation in genes associated with high-altitude function in the speckled teal (Anas flavirostris) in the Andes	https://www.ncbi.nlm.nih.gov/nuccore/	https://www.ncbi.nlm.nih.gov/nuccore/ MG520172	NCBI GenBank	MG520172
Graham AM, Lavretsky P, Munoz-Fuentes V, Green AJ, Wilson RE, McCracken KG	2017	Migration-selection balance drives genetic differentiation in genes associated with high-altitude function in the speckled teal (Anas flavirostris) in the Andes	https://www.ncbi.nlm.nih.gov/nuccore/	https://www.ncbi.nlm.nih.gov/nuccore/ MG520173	NCBI GenBank	MG520173
Graham AM, Lavretsky P, Munoz-Fuentes V, Green AJ, Wilson RE, McCracken KG	2017	Migration-selection balance drives genetic differentiation in genes associated with high-altitude function in the speckled teal (Anas flavirostris) in the Andes	https://www.ncbi.nlm.nih.gov/nuccore/	https://www.ncbi.nlm.nih.gov/nuccore/ MG520174	NCBI GenBank	MG520174
Graham AM, Lavretsky P, Munoz-Fuentes V, Green AJ, Wilson RE, McCracken KG	2017	Migration-selection balance drives genetic differentiation in genes associated with high-altitude function in the speckled teal (Anas flavirostris) in the Andes	https://www.ncbi.nlm.nih.gov/nuccore/	https://www.ncbi.nlm.nih.gov/nuccore/ MG520175	NCBI GenBank	MG520175
Bulgarella M, Kopuchian C, Giacom AS, Matus R, Wilson RE, McCracken KG	2014	Molecular phylogeny of the South American sheldgeese with implications for conservation of Falkland Islands (Malvinas) and continental populations of the Ruddy-headed Goose Chloephaga rubidiceps and Upland Goose C. picta	https://www.ncbi.nlm.nih.gov/nuccore/	https://www.ncbi.nlm.nih.gov/nuccore/ KC109071	NCBI GenBank	KC109071
Graham AM, Lavretsky P, Munoz-Fuentes V, Green AJ, Wilson RE, McCracken KG	2014	Molecular phylogeny of the South American sheldgeese with implications for conservation of Falkland Islands (Malvinas) and continental populations of the Ruddy-headed Goose Chloephaga rubidiceps and Upland Goose C. picta	https://www.ncbi.nlm.nih.gov/nuccore/	https://www.ncbi.nlm.nih.gov/nuccore/ KC109072	NCBI GenBank	KC109072
Graham AM, Lavretsky P, Munoz-Fuentes V, Green AJ, Wilson RE, McCracken KG	2014	Molecular phylogeny of the South American sheldgeese with implications for conservation of Falkland Islands (Malvinas) and continental populations of the Ruddy-headed Goose Chloephaga rubidiceps and Upland Goose C. picta	https://www.ncbi.nlm.nih.gov/nuccore/	https://www.ncbi.nlm.nih.gov/nuccore/ KC109073	NCBI GenBank	KC109073
Graham AM, Lavretsky P, Munoz-Fuentes V, Green AJ, Wilson RE, McCracken KG	2014	Molecular phylogeny of the South American sheldgeese with implications for conservation of Falkland Islands (Malvinas) and continental populations of the Ruddy-headed Goose Chloephaga rubidiceps and Upland Goose C. picta	https://www.ncbi.nlm.nih.gov/nuccore/	https://www.ncbi.nlm.nih.gov/nuccore/ KC109074	NCBI GenBank	KC109074
Graham AM, Lavretsky P, Munoz-Fuentes V, Green AJ, Wilson RE, McCracken KG	2014	Molecular phylogeny of the South American sheldgeese with implications for conservation of Falkland Islands (Malvinas) and continental populations of the Ruddy-headed Goose Chloephaga rubidiceps and Upland Goose C. picta	https://www.ncbi.nlm.nih.gov/nuccore/	https://www.ncbi.nlm.nih.gov/nuccore/ KC109075	NCBI GenBank	KC109075
Graham AM, Lavretsky P, Munoz-Fuentes V, Green AJ, Wilson RE, McCracken KG	2014	Molecular phylogeny of the South American sheldgeese with implications for conservation of Falkland Islands (Malvinas) and continental populations of the Ruddy-headed Goose Chloephaga rubidiceps and Upland Goose C. picta	https://www.ncbi.nlm.nih.gov/nuccore/	https://www.ncbi.nlm.nih.gov/nuccore/ KC109076	NCBI GenBank	KC109076
Graham AM, Lavretsky P, Munoz-Fuentes V, Green AJ, Wilson RE, McCracken KG	2014	Molecular phylogeny of the South American sheldgeese with implications for conservation of Falkland Islands (Malvinas) and continental populations of the Ruddy-headed Goose Chloephaga rubidiceps and Upland Goose C. picta	https://www.ncbi.nlm.nih.gov/nuccore/	https://www.ncbi.nlm.nih.gov/nuccore/ KC109077	NCBI GenBank	KC109077
Graham AM, Lavretsky P, Munoz-Fuentes V, Green AJ, Wilson RE, McCracken KG	2014	Molecular phylogeny of the South American sheldgeese with implications for conservation of Falkland Islands (Malvinas) and continental populations of the Ruddy-headed Goose Chloephaga rubidiceps and Upland Goose C. picta	https://www.ncbi.nlm.nih.gov/nuccore/	https://www.ncbi.nlm.nih.gov/nuccore/ KC109078	NCBI GenBank	KC109078
Graham AM, Lavretsky P, Munoz-Fuentes V, Green AJ, Wilson RE, McCracken KG	2014	Molecular phylogeny of the South American sheldgeese with implications for conservation of Falkland Islands (Malvinas) and continental populations of the Ruddy-headed Goose Chloephaga rubidiceps and Upland Goose C. picta	https://www.ncbi.nlm.nih.gov/nuccore/	https://www.ncbi.nlm.nih.gov/nuccore/ KC109079	NCBI GenBank	KC109079
Graham AM, Lavretsky P, Munoz-Fuentes V, Green AJ, Wilson RE, McCracken KG	2014	Molecular phylogeny of the South American sheldgeese with implications for conservation of Falkland Islands (Malvinas) and continental populations of the Ruddy-headed Goose Chloephaga rubidiceps and Upland Goose C. picta	https://www.ncbi.nlm.nih.gov/nuccore/	https://www.ncbi.nlm.nih.gov/nuccore/ KC109080	NCBI GenBank	KC109080
Dawson NJ, Alza L, Nandal G, Scott GR, McCracken KG	2020	Convergent changes in muscle metabolism depend on duration of high-altitude ancestry across Andean waterfowl	https://www.ncbi.nlm.nih.gov/nuccore/	https://www.ncbi.nlm.nih.gov/nuccore/ MN734269	NCBI GenBank	MN734269
Dawson NJ, Alza L, Nandal G, Scott GR, McCracken KG	2020	Convergent changes in muscle metabolism depend on duration of high-altitude ancestry across Andean waterfowl	https://www.ncbi.nlm.nih.gov/nuccore/	https://www.ncbi.nlm.nih.gov/nuccore/ MN734270	NCBI GenBank	MN734270
Dawson NJ, Alza L, Nandal G, Scott GR, McCracken KG	2020	Convergent changes in muscle metabolism depend on duration of high-altitude ancestry across Andean waterfowl	https://www.ncbi.nlm.nih.gov/nuccore/	https://www.ncbi.nlm.nih.gov/nuccore/ MN734271	NCBI GenBank	MN734271
Dawson NJ, Alza L, Nandal G, Scott GR, McCracken KG	2020	Convergent changes in muscle metabolism depend on duration of high-altitude ancestry across Andean waterfowl	https://www.ncbi.nlm.nih.gov/nuccore/	https://www.ncbi.nlm.nih.gov/nuccore/ MN734272	NCBI GenBank	MN734272
Dawson NJ, Alza L, Nandal G, Scott GR, McCracken KG	2020	Convergent changes in muscle metabolism depend on duration of high-altitude ancestry across Andean waterfowl	https://www.ncbi.nlm.nih.gov/nuccore/	https://www.ncbi.nlm.nih.gov/nuccore/ MN734273	NCBI GenBank	MN734273
Dawson NJ, Alza L, Nandal G, Scott GR, McCracken KG	2020	Convergent changes in muscle metabolism depend on duration of high-altitude ancestry across Andean waterfowl	https://www.ncbi.nlm.nih.gov/nuccore/	https://www.ncbi.nlm.nih.gov/nuccore/ MN734274	NCBI GenBank	MN734274
Dawson NJ, Alza L, Nandal G, Scott GR, McCracken KG	2020	Convergent changes in muscle metabolism depend on duration of high-altitude ancestry across Andean waterfowl	https://www.ncbi.nlm.nih.gov/nuccore/	https://www.ncbi.nlm.nih.gov/nuccore/ MN734275	NCBI GenBank	MN734275
Dawson NJ, Alza L, Nandal G, Scott GR, McCracken KG	2020	Convergent changes in muscle metabolism depend on duration of high-altitude ancestry across Andean waterfowl	https://www.ncbi.nlm.nih.gov/nuccore/	https://www.ncbi.nlm.nih.gov/nuccore/ MN734276	NCBI GenBank	MN734276
Dawson NJ, Alza L, Nandal G, Scott GR, McCracken KG	2020	Convergent changes in muscle metabolism depend on duration of high-altitude ancestry across Andean waterfowl	https://www.ncbi.nlm.nih.gov/nuccore/	https://www.ncbi.nlm.nih.gov/nuccore/ MN734277	NCBI GenBank	MN734277
Dawson NJ, Alza L, Nandal G, Scott GR, McCracken KG	2020	Convergent changes in muscle metabolism depend on duration of high-altitude ancestry across Andean waterfowl	https://www.ncbi.nlm.nih.gov/nuccore/	https://www.ncbi.nlm.nih.gov/nuccore/ MN734278	NCBI GenBank	MN734278
Dawson NJ, Alza L, Nandal G, Scott GR, McCracken KG	2020	Convergent changes in muscle metabolism depend on duration of high-altitude ancestry across Andean waterfowl	https://www.ncbi.nlm.nih.gov/nuccore/	https://www.ncbi.nlm.nih.gov/nuccore/ MN734279	NCBI GenBank	MN734279
Dawson NJ, Alza L, Nandal G, Scott GR, McCracken KG	2020	Convergent changes in muscle metabolism depend on duration of high-altitude ancestry across Andean waterfowl	https://www.ncbi.nlm.nih.gov/nuccore/	https://www.ncbi.nlm.nih.gov/nuccore/ MN734280	NCBI GenBank	MN734280
Dawson NJ, Alza L, Nandal G, Scott GR, McCracken KG	2020	Convergent changes in muscle metabolism depend on duration of high-altitude ancestry across Andean waterfowl	https://www.ncbi.nlm.nih.gov/nuccore/	https://www.ncbi.nlm.nih.gov/nuccore/ MN734281	NCBI GenBank	MN734281
Dawson NJ, Alza L, Nandal G, Scott GR, McCracken KG	2020	Convergent changes in muscle metabolism depend on duration of high-altitude ancestry across Andean waterfowl	https://www.ncbi.nlm.nih.gov/nuccore/	https://www.ncbi.nlm.nih.gov/nuccore/ MN734282	NCBI GenBank	MN734282
Dawson NJ, Alza L, Nandal G, Scott GR, McCracken KG	2020	Convergent changes in muscle metabolism depend on duration of high-altitude ancestry across Andean waterfowl	https://www.ncbi.nlm.nih.gov/nuccore/	https://www.ncbi.nlm.nih.gov/nuccore/ MN734283	NCBI GenBank	MN734283
Dawson NJ, Alza L, Nandal G, Scott GR, McCracken KG	2020	Convergent changes in muscle metabolism depend on duration of high-altitude ancestry across Andean waterfowl	https://www.ncbi.nlm.nih.gov/nuccore/	https://www.ncbi.nlm.nih.gov/nuccore/ MN734284	NCBI GenBank	MN734284
Dawson NJ, Alza L, Nandal G, Scott GR, McCracken KG	2020	Convergent changes in muscle metabolism depend on duration of high-altitude ancestry across Andean waterfowl	https://www.ncbi.nlm.nih.gov/nuccore/	https://www.ncbi.nlm.nih.gov/nuccore/ MN734285	NCBI GenBank	MN734285
Dawson NJ, Alza L, Nandal G, Scott GR, McCracken KG	2020	Convergent changes in muscle metabolism depend on duration of high-altitude ancestry across Andean waterfowl	https://www.ncbi.nlm.nih.gov/nuccore/	https://www.ncbi.nlm.nih.gov/nuccore/ MN734286	NCBI GenBank	MN734286
Dawson NJ, Alza L, Nandal G, Scott GR, McCracken KG	2020	Convergent changes in muscle metabolism depend on duration of high-altitude ancestry across Andean waterfowl	https://www.ncbi.nlm.nih.gov/nuccore/	https://www.ncbi.nlm.nih.gov/nuccore/ MN734287	NCBI GenBank	MN734287
Dawson NJ, Alza L, Nandal G, Scott GR, McCracken KG	2020	Convergent changes in muscle metabolism depend on duration of high-altitude ancestry across Andean waterfowl	https://www.ncbi.nlm.nih.gov/nuccore/	https://www.ncbi.nlm.nih.gov/nuccore/ MN734288	NCBI GenBank	MN734288
Dawson NJ, Alza L, Nandal G, Scott GR, McCracken KG	2020	Convergent changes in muscle metabolism depend on duration of high-altitude ancestry across Andean waterfowl	https://www.ncbi.nlm.nih.gov/nuccore/	https://www.ncbi.nlm.nih.gov/nuccore/ MN734289	NCBI GenBank	MN734289
Dawson NJ, Alza L, Nandal G, Scott GR, McCracken KG	2020	Convergent changes in muscle metabolism depend on duration of high-altitude ancestry across Andean waterfowl	https://www.ncbi.nlm.nih.gov/nuccore/	https://www.ncbi.nlm.nih.gov/nuccore/ MN734290	NCBI GenBank	MN734290
Dawson NJ, Alza L, Nandal G, Scott GR, McCracken KG	2020	Convergent changes in muscle metabolism depend on duration of high-altitude ancestry across Andean waterfowl	https://www.ncbi.nlm.nih.gov/nuccore/	https://www.ncbi.nlm.nih.gov/nuccore/ MN734291	NCBI GenBank	MN734291
Dawson NJ, Alza L, Nandal G, Scott GR, McCracken KG	2020	Convergent changes in muscle metabolism depend on duration of high-altitude ancestry across Andean waterfowl	https://www.ncbi.nlm.nih.gov/nuccore/	https://www.ncbi.nlm.nih.gov/nuccore/ MN734292	NCBI GenBank	MN734292
Dawson NJ, Alza L, Nandal G, Scott GR, McCracken KG	2020	Convergent changes in muscle metabolism depend on duration of high-altitude ancestry across Andean waterfowl	https://www.ncbi.nlm.nih.gov/nuccore/	https://www.ncbi.nlm.nih.gov/nuccore/ MN734293	NCBI GenBank	MN734293
Dawson NJ, Alza L, Nandal G, Scott GR, McCracken KG	2020	Convergent changes in muscle metabolism depend on duration of high-altitude ancestry across Andean waterfowl	https://www.ncbi.nlm.nih.gov/nuccore/	https://www.ncbi.nlm.nih.gov/nuccore/ MN734294	NCBI GenBank	MN734294
Dawson NJ, Alza L, Nandal G, Scott GR, McCracken KG	2020	Convergent changes in muscle metabolism depend on duration of high-altitude ancestry across Andean waterfowl	https://www.ncbi.nlm.nih.gov/nuccore/	https://www.ncbi.nlm.nih.gov/nuccore/ MN734295	NCBI GenBank	MN734295
Dawson NJ, Alza L, Nandal G, Scott GR, McCracken KG	2020	Convergent changes in muscle metabolism depend on duration of high-altitude ancestry across Andean waterfowl	https://www.ncbi.nlm.nih.gov/nuccore/	https://www.ncbi.nlm.nih.gov/nuccore/ MN734296	NCBI GenBank	MN734296
Dawson NJ, Alza L, Nandal G, Scott GR, McCracken KG	2020	Convergent changes in muscle metabolism depend on duration of high-altitude ancestry across Andean waterfowl	https://www.ncbi.nlm.nih.gov/nuccore/	https://www.ncbi.nlm.nih.gov/nuccore/ MN734297	NCBI GenBank	MN734297
Dawson NJ, Alza L, Nandal G, Scott GR, McCracken KG	2020	Convergent changes in muscle metabolism depend on duration of high-altitude ancestry across Andean waterfowl	https://www.ncbi.nlm.nih.gov/nuccore/	https://www.ncbi.nlm.nih.gov/nuccore/ MN734298	NCBI GenBank	MN734298
Dawson NJ, Alza L, Nandal G, Scott GR, McCracken KG	2020	Convergent changes in muscle metabolism depend on duration of high-altitude ancestry across Andean waterfowl	https://www.ncbi.nlm.nih.gov/nuccore/	https://www.ncbi.nlm.nih.gov/nuccore/ MN734299	NCBI GenBank	MN734299
Dawson NJ, Alza L, Nandal G, Scott GR, McCracken KG	2020	Convergent changes in muscle metabolism depend on duration of high-altitude ancestry across Andean waterfowl	https://www.ncbi.nlm.nih.gov/nuccore/	https://www.ncbi.nlm.nih.gov/nuccore/ MN734300	NCBI GenBank	MN734300
Dawson NJ, Alza L, Nandal G, Scott GR, McCracken KG	2020	Convergent changes in muscle metabolism depend on duration of high-altitude ancestry across Andean waterfowl	https://www.ncbi.nlm.nih.gov/nuccore/	https://www.ncbi.nlm.nih.gov/nuccore/ MN734301	NCBI GenBank	MN734301
Dawson NJ, Alza L, Nandal G, Scott GR, McCracken KG	2020	Convergent changes in muscle metabolism depend on duration of high-altitude ancestry across Andean waterfowl	https://www.ncbi.nlm.nih.gov/nuccore/	https://www.ncbi.nlm.nih.gov/nuccore/ MN734302	NCBI GenBank	MN734302
Dawson NJ, Alza L, Nandal G, Scott GR, McCracken KG	2020	Convergent changes in muscle metabolism depend on duration of high-altitude ancestry across Andean waterfowl	https://www.ncbi.nlm.nih.gov/nuccore/	https://www.ncbi.nlm.nih.gov/nuccore/ MN734303	NCBI GenBank	MN734303
Dawson NJ, Alza L, Nandal G, Scott GR, McCracken KG	2020	Convergent changes in muscle metabolism depend on duration of high-altitude ancestry across Andean waterfowl	https://www.ncbi.nlm.nih.gov/nuccore/	https://www.ncbi.nlm.nih.gov/nuccore/ MN734304	NCBI GenBank	MN734304
Dawson NJ, Alza L, Nandal G, Scott GR, McCracken KG	2020	Convergent changes in muscle metabolism depend on duration of high-altitude ancestry across Andean waterfowl	https://www.ncbi.nlm.nih.gov/nuccore/	https://www.ncbi.nlm.nih.gov/nuccore/ MN734305	NCBI GenBank	MN734305
Dawson NJ, Alza L, Nandal G, Scott GR, McCracken KG	2020	Convergent changes in muscle metabolism depend on duration of high-altitude ancestry across Andean waterfowl	https://www.ncbi.nlm.nih.gov/nuccore/	https://www.ncbi.nlm.nih.gov/nuccore/ MN734306	NCBI GenBank	MN734306
Dawson NJ, Alza L, Nandal G, Scott GR, McCracken KG	2020	Convergent changes in muscle metabolism depend on duration of high-altitude ancestry across Andean waterfowl	https://www.ncbi.nlm.nih.gov/nuccore/	https://www.ncbi.nlm.nih.gov/nuccore/ MN734307	NCBI GenBank	MN734307
Dawson NJ, Alza L, Nandal G, Scott GR, McCracken KG	2020	Convergent changes in muscle metabolism depend on duration of high-altitude ancestry across Andean waterfowl	https://www.ncbi.nlm.nih.gov/nuccore/	https://www.ncbi.nlm.nih.gov/nuccore/ MN734308	NCBI GenBank	MN734308
Dawson NJ, Alza L, Nandal G, Scott GR, McCracken KG	2020	Convergent changes in muscle metabolism depend on duration of high-altitude ancestry across Andean waterfowl	https://www.ncbi.nlm.nih.gov/nuccore/	https://www.ncbi.nlm.nih.gov/nuccore/ MN734309	NCBI GenBank	MN734309
Dawson NJ, Alza L, Nandal G, Scott GR, McCracken KG	2020	Convergent changes in muscle metabolism depend on duration of high-altitude ancestry across Andean waterfowl	https://www.ncbi.nlm.nih.gov/nuccore/	https://www.ncbi.nlm.nih.gov/nuccore/ MN734310	NCBI GenBank	MN734310
Dawson NJ, Alza L, Nandal G, Scott GR, McCracken KG	2020	Convergent changes in muscle metabolism depend on duration of high-altitude ancestry across Andean waterfowl	https://www.ncbi.nlm.nih.gov/nuccore/	https://www.ncbi.nlm.nih.gov/nuccore/ MN734311	NCBI GenBank	MN734311
Dawson NJ, Alza L, Nandal G, Scott GR, McCracken KG	2020	Convergent changes in muscle metabolism depend on duration of high-altitude ancestry across Andean waterfowl	https://www.ncbi.nlm.nih.gov/nuccore/	https://www.ncbi.nlm.nih.gov/nuccore/ MN734312	NCBI GenBank	MN734312
Dawson NJ, Alza L, Nandal G, Scott GR, McCracken KG	2020	Convergent changes in muscle metabolism depend on duration of high-altitude ancestry across Andean waterfowl	https://www.ncbi.nlm.nih.gov/nuccore/	https://www.ncbi.nlm.nih.gov/nuccore/ MN734313	NCBI GenBank	MN734313
Dawson NJ, Alza L, Nandal G, Scott GR, McCracken KG	2020	Convergent changes in muscle metabolism depend on duration of high-altitude ancestry across Andean waterfowl	https://www.ncbi.nlm.nih.gov/nuccore/	https://www.ncbi.nlm.nih.gov/nuccore/ MN734314	NCBI GenBank	MN734314
Dawson NJ, Alza L, Nandal G, Scott GR, McCracken KG	2020	Convergent changes in muscle metabolism depend on duration of high-altitude ancestry across Andean waterfowl	https://www.ncbi.nlm.nih.gov/nuccore/	https://www.ncbi.nlm.nih.gov/nuccore/ MN734315	NCBI GenBank	MN734315
Dawson NJ, Alza L, Nandal G, Scott GR, McCracken KG	2020	Convergent changes in muscle metabolism depend on duration of high-altitude ancestry across Andean waterfowl	https://www.ncbi.nlm.nih.gov/nuccore/	https://www.ncbi.nlm.nih.gov/nuccore/ MN734316	NCBI GenBank	MN734316
Dawson NJ, Alza L, Nandal G, Scott GR, McCracken KG	2020	Convergent changes in muscle metabolism depend on duration of high-altitude ancestry across Andean waterfowl	https://www.ncbi.nlm.nih.gov/nuccore/	https://www.ncbi.nlm.nih.gov/nuccore/ MN734317	NCBI GenBank	MN734317
Dawson NJ, Alza L, Nandal G, Scott GR, McCracken KG	2020	Convergent changes in muscle metabolism depend on duration of high-altitude ancestry across Andean waterfowl	https://www.ncbi.nlm.nih.gov/nuccore/	https://www.ncbi.nlm.nih.gov/nuccore/ MN734318	NCBI GenBank	MN734318
Dawson NJ, Alza L, Nandal G, Scott GR, McCracken KG	2020	Convergent changes in muscle metabolism depend on duration of high-altitude ancestry across Andean waterfowl	https://www.ncbi.nlm.nih.gov/nuccore/	https://www.ncbi.nlm.nih.gov/nuccore/ MN734319	NCBI GenBank	MN734319
Dawson NJ, Alza L, Nandal G, Scott GR, McCracken KG	2020	Convergent changes in muscle metabolism depend on duration of high-altitude ancestry across Andean waterfowl	https://www.ncbi.nlm.nih.gov/nuccore/	https://www.ncbi.nlm.nih.gov/nuccore/ MN734320	NCBI GenBank	MN734320
Dawson NJ, Alza L, Nandal G, Scott GR, McCracken KG	2020	Convergent changes in muscle metabolism depend on duration of high-altitude ancestry across Andean waterfowl	https://www.ncbi.nlm.nih.gov/nuccore/	https://www.ncbi.nlm.nih.gov/nuccore/ MN734321	NCBI GenBank	MN734321
Dawson NJ, Alza L, Nandal G, Scott GR, McCracken KG	2020	Convergent changes in muscle metabolism depend on duration of high-altitude ancestry across Andean waterfowl	https://www.ncbi.nlm.nih.gov/nuccore/	https://www.ncbi.nlm.nih.gov/nuccore/ MN734322	NCBI GenBank	MN734322
Dawson NJ, Alza L, Nandal G, Scott GR, McCracken KG	2020	Convergent changes in muscle metabolism depend on duration of high-altitude ancestry across Andean waterfowl	https://www.ncbi.nlm.nih.gov/nuccore/	https://www.ncbi.nlm.nih.gov/nuccore/ MN734323	NCBI GenBank	MN734323
Dawson NJ, Alza L, Nandal G, Scott GR, McCracken KG	2020	Convergent changes in muscle metabolism depend on duration of high-altitude ancestry across Andean waterfowl	https://www.ncbi.nlm.nih.gov/nuccore/	https://www.ncbi.nlm.nih.gov/nuccore/ MN734324	NCBI GenBank	MN734324
Dawson NJ, Alza L, Nandal G, Scott GR, McCracken KG	2020	Convergent changes in muscle metabolism depend on duration of high-altitude ancestry across Andean waterfowl	https://www.ncbi.nlm.nih.gov/nuccore/	https://www.ncbi.nlm.nih.gov/nuccore/ MN734325	NCBI GenBank	MN734325
Dawson NJ, Alza L, Nandal G, Scott GR, McCracken KG	2020	Convergent changes in muscle metabolism depend on duration of high-altitude ancestry across Andean waterfowl	https://www.ncbi.nlm.nih.gov/nuccore/	https://www.ncbi.nlm.nih.gov/nuccore/ MN734326	NCBI GenBank	MN734326
Dawson NJ, Alza L, Nandal G, Scott GR, McCracken KG	2020	Convergent changes in muscle metabolism depend on duration of high-altitude ancestry across Andean waterfowl	https://www.ncbi.nlm.nih.gov/nuccore/	https://www.ncbi.nlm.nih.gov/nuccore/ MN734327	NCBI GenBank	MN734327
Dawson NJ, Alza L, Nandal G, Scott GR, McCracken KG	2020	Convergent changes in muscle metabolism depend on duration of high-altitude ancestry across Andean waterfowl	https://www.ncbi.nlm.nih.gov/nuccore/	https://www.ncbi.nlm.nih.gov/nuccore/ MN734328	NCBI GenBank	MN734328
Dawson NJ, Alza L, Nandal G, Scott GR, McCracken KG	2020	Convergent changes in muscle metabolism depend on duration of high-altitude ancestry across Andean waterfowl	https://www.ncbi.nlm.nih.gov/nuccore/	https://www.ncbi.nlm.nih.gov/nuccore/ MN734329	NCBI GenBank	MN734329
Dawson NJ, Alza L, Nandal G, Scott GR, McCracken KG	2020	Convergent changes in muscle metabolism depend on duration of high-altitude ancestry across Andean waterfowl	https://www.ncbi.nlm.nih.gov/nuccore/	https://www.ncbi.nlm.nih.gov/nuccore/ MN734330	NCBI GenBank	MN734330
Dawson NJ, Alza L, Nandal G, Scott GR, McCracken KG	2020	Convergent changes in muscle metabolism depend on duration of high-altitude ancestry across Andean waterfowl	https://www.ncbi.nlm.nih.gov/nuccore/	https://www.ncbi.nlm.nih.gov/nuccore/ MN734331	NCBI GenBank	MN734331
Dawson NJ, Alza L, Nandal G, Scott GR, McCracken KG	2020	Convergent changes in muscle metabolism depend on duration of high-altitude ancestry across Andean waterfowl	https://www.ncbi.nlm.nih.gov/nuccore/	https://www.ncbi.nlm.nih.gov/nuccore/ MN734332	NCBI GenBank	MN734332
Dawson NJ, Alza L, Nandal G, Scott GR, McCracken KG	2020	Convergent changes in muscle metabolism depend on duration of high-altitude ancestry across Andean waterfowl	https://www.ncbi.nlm.nih.gov/nuccore/	https://www.ncbi.nlm.nih.gov/nuccore/ MN734333	NCBI GenBank	MN734333
Dawson NJ, Alza L, Nandal G, Scott GR, McCracken KG	2020	Convergent changes in muscle metabolism depend on duration of high-altitude ancestry across Andean waterfowl	https://www.ncbi.nlm.nih.gov/nuccore/	https://www.ncbi.nlm.nih.gov/nuccore/ MN734334	NCBI GenBank	MN734334
Dawson NJ, Alza L, Nandal G, Scott GR, McCracken KG	2020	Convergent changes in muscle metabolism depend on duration of high-altitude ancestry across Andean waterfowl	https://www.ncbi.nlm.nih.gov/nuccore/	https://www.ncbi.nlm.nih.gov/nuccore/ MN734335	NCBI GenBank	MN734335
Dawson NJ, Alza L, Nandal G, Scott GR, McCracken KG	2020	Convergent changes in muscle metabolism depend on duration of high-altitude ancestry across Andean waterfowl	https://www.ncbi.nlm.nih.gov/nuccore/	https://www.ncbi.nlm.nih.gov/nuccore/ MN734336	NCBI GenBank	MN734336
Dawson NJ, Alza L, Nandal G, Scott GR, McCracken KG	2020	Convergent changes in muscle metabolism depend on duration of high-altitude ancestry across Andean waterfowl	https://www.ncbi.nlm.nih.gov/nuccore/	https://www.ncbi.nlm.nih.gov/nuccore/ MN734337	NCBI GenBank	MN734337
Dawson NJ, Alza L, Nandal G, Scott GR, McCracken KG	2020	Convergent changes in muscle metabolism depend on duration of high-altitude ancestry across Andean waterfowl	https://www.ncbi.nlm.nih.gov/nuccore/	https://www.ncbi.nlm.nih.gov/nuccore/ MN734338	NCBI GenBank	MN734338
Dawson NJ, Alza L, Nandal G, Scott GR, McCracken KG	2020	Convergent changes in muscle metabolism depend on duration of high-altitude ancestry across Andean waterfowl	https://www.ncbi.nlm.nih.gov/nuccore/	https://www.ncbi.nlm.nih.gov/nuccore/ MN734339	NCBI GenBank	MN734339
Dawson NJ, Alza L, Nandal G, Scott GR, McCracken KG	2020	Convergent changes in muscle metabolism depend on duration of high-altitude ancestry across Andean waterfowl	https://www.ncbi.nlm.nih.gov/nuccore/	https://www.ncbi.nlm.nih.gov/nuccore/ MN734340	NCBI GenBank	MN734340
Dawson NJ, Alza L, Nandal G, Scott GR, McCracken KG	2020	Convergent changes in muscle metabolism depend on duration of high-altitude ancestry across Andean waterfowl	https://www.ncbi.nlm.nih.gov/nuccore/	https://www.ncbi.nlm.nih.gov/nuccore/ MN734341	NCBI GenBank	MN734341
Dawson NJ, Alza L, Nandal G, Scott GR, McCracken KG	2020	Convergent changes in muscle metabolism depend on duration of high-altitude ancestry across Andean waterfowl	https://www.ncbi.nlm.nih.gov/nuccore/	https://www.ncbi.nlm.nih.gov/nuccore/ MN734342	NCBI GenBank	MN734342
Dawson NJ, Alza L, Nandal G, Scott GR, McCracken KG	2020	Convergent changes in muscle metabolism depend on duration of high-altitude ancestry across Andean waterfowl	https://www.ncbi.nlm.nih.gov/nuccore/	https://www.ncbi.nlm.nih.gov/nuccore/ MN734343	NCBI GenBank	MN734343
Dawson NJ, Alza L, Nandal G, Scott GR, McCracken KG	2020	Convergent changes in muscle metabolism depend on duration of high-altitude ancestry across Andean waterfowl	https://www.ncbi.nlm.nih.gov/nuccore/	https://www.ncbi.nlm.nih.gov/nuccore/ MN734344	NCBI GenBank	MN734344
Dawson NJ, Alza L, Nandal G, Scott GR, McCracken KG	2020	Convergent changes in muscle metabolism depend on duration of high-altitude ancestry across Andean waterfowl	https://www.ncbi.nlm.nih.gov/nuccore/	https://www.ncbi.nlm.nih.gov/nuccore/ MN734345	NCBI GenBank	MN734345
